# Supplementary material
Source: publisher figshare collection journal article supplement (https://gsajournals.figshare.com/ndownloader/files/18726512)
Supplement: Supplementary file 1 [file 18726512]

## Sheet: mega.table
Supplemental Table S4. Genes predicted under each QTL (column A), their Arabidopsis homologs and function (as per Saski et al. 2017; columns B-D), and detected differences between wild (Tx2094) and domesticated (Acala Maxxa) G. hirsutum (columns E-G). Predicted transcription factors (H) and regions previously identified as part of selective sweeps (I) are listed. QTL are listed by their trait cat…
G. hirsutum gene name	Arabidopsis thaliana gene name	A. thalianagene symbol	A. thaliana function	Predicted amino acid change	SNP with possible effect (including amino acid change)	Differential expression between TX2094 and Acala Maxxa at 10 or 20 dpa fiber	Predicted transcription factor	Gene with known phenotype effects	Gene within selective sweep region	Fiber_color category	Fiber_color_Ca	Fiber_color_Cb	Fiber_color_CL	Fiber_length.category	Fiber_length_L25n	Fiber_length_L5n	Fiber_length_Ln	Fiber_length_LnCV	Fiber_length_Lw	Fiber_length_UQLw	Fiber_quality.category	Fiber_quality_Fine	Fiber_quality_MR	Fiber_quality_NS	Fiber_quality_SFCn	Fiber_quality_TrS	Flower.category	Flower_CS	Flower_PC	Flower_PS	Flower_SD	Fruiting_habit.category	Fruiting_habit_NF	Fruiting_habit_PHTN	Fruiting_habit_TN	Fruiting_habit_TNFB	Phenology.category	Phenology_FBFF	Phenology_GB	Phenology_TNFF	Plant_architecture.category	Plant_architecture_BA	Plant_architecture_FB1	Plant_architecture_FB2	Plant_architecture_PH	Plant_architecture_PHFB1	Plant_architecture_PHFB2	Plant_architecture_SP	Seed.category
Gohir.A01G049300																																TRUE				TRUE													TRUE
Gohir.A01G049400	AT1G29290			TRUE	TRUE																											TRUE				TRUE													TRUE
Gohir.A01G049500																																TRUE				TRUE													TRUE
Gohir.A01G049600																																TRUE				TRUE													TRUE
Gohir.A01G049700																																TRUE				TRUE													TRUE
Gohir.A01G049800																																TRUE				TRUE													TRUE
Gohir.A01G049900	AT3G10050	OMR1	L-O-methylthreonine resistant 1																													TRUE				TRUE													TRUE
Gohir.A01G050000																																TRUE				TRUE													TRUE
Gohir.A01G050100	AT1G63070		pentatricopeptide (PPR) repeat-containing protein		TRUE	TRUE																										TRUE				TRUE													TRUE
Gohir.A01G050200	AT1G26880		Ribosomal protein L34e superfamily protein																													TRUE				TRUE													TRUE
Gohir.A01G050300	AT1G53380		Plant protein of unknown function (DUF641)																													TRUE				TRUE													TRUE
Gohir.A01G050400	AT4G29510	ATPRMT11,ATPRMT1B,PRMT11,PRMT1B	arginine methyltransferase 11																													TRUE				TRUE													TRUE
Gohir.A01G050500	AT1G29310		SecY protein transport family protein																													TRUE				TRUE													TRUE
Gohir.A01G050600					TRUE																											TRUE				TRUE													TRUE
Gohir.A01G050700	AT4G38700		Disease resistance-responsive (dirigent-like protein) family protein	TRUE	TRUE																											TRUE				TRUE													TRUE
Gohir.A01G050800	AT2G21110		Disease resistance-responsive (dirigent-like protein) family protein		TRUE																											TRUE				TRUE													TRUE
Gohir.A01G050900	AT1G53400		Ubiquitin domain-containing protein		TRUE																											TRUE				TRUE													TRUE
Gohir.A01G051000	AT1G78650	POLD3	DNA-directed DNA polymerases	TRUE	TRUE																											TRUE				TRUE													TRUE
Gohir.A01G051100	AT1G78650	POLD3	DNA-directed DNA polymerases																													TRUE				TRUE													TRUE
Gohir.A01G051200	AT1G78660	ATGGH1,GGH1	gamma-glutamyl hydrolase 1																													TRUE				TRUE													TRUE
Gohir.A01G051300	AT3G47570		Leucine-rich repeat protein kinase family protein	TRUE	TRUE																											TRUE				TRUE													TRUE
Gohir.A01G051400	AT1G78660	ATGGH1,GGH1	gamma-glutamyl hydrolase 1																													TRUE				TRUE													TRUE
Gohir.A01G051500																																TRUE				TRUE													TRUE
Gohir.A01G051600																																TRUE				TRUE													TRUE
Gohir.A01G051700	AT3G47570		Leucine-rich repeat protein kinase family protein	TRUE	TRUE																											TRUE				TRUE													TRUE
Gohir.A01G051800	AT3G23110	AtRLP37,RLP37	receptor like protein 37																													TRUE				TRUE													TRUE
Gohir.A01G051900	AT3G47090		Leucine-rich repeat protein kinase family protein																													TRUE				TRUE													TRUE
Gohir.A01G052000																																TRUE				TRUE													TRUE
Gohir.A01G052100	AT1G16970	ATKU70,KU70	KU70 homolog	TRUE	TRUE																											TRUE				TRUE													TRUE
Gohir.A01G052200	AT5G38260		Protein kinase superfamily protein	TRUE	TRUE																											TRUE				TRUE													TRUE
Gohir.A01G052300	AT5G38260		Protein kinase superfamily protein	TRUE	TRUE																											TRUE				TRUE													TRUE
Gohir.A01G052400	AT1G78700	BEH4	BES1/BZR1 homolog 4	TRUE	TRUE		TRUE																									TRUE				TRUE													TRUE
Gohir.A01G052500	AT1G29800		RING/FYVE/PHD-type zinc finger family protein	TRUE	TRUE	TRUE																										TRUE				TRUE													TRUE
Gohir.A01G052600	AT5G07010	ATST2A,ST2A	sulfotransferase 2A																													TRUE				TRUE													TRUE
Gohir.A01G052700	AT1G13420	ATST4B,ST4B	sulfotransferase 4B																													TRUE				TRUE													TRUE
Gohir.A01G052800	AT3G30841		Cofactor-independent phosphoglycerate mutase																													TRUE				TRUE													TRUE
Gohir.A01G052900	AT3G14830																															TRUE				TRUE													TRUE
Gohir.A01G053000	AT1G64810	APO1	Arabidopsis thaliana protein of unknown function (DUF794)																													TRUE				TRUE													TRUE
Gohir.A01G053100																																TRUE				TRUE													TRUE
Gohir.A01G053200				TRUE	TRUE																											TRUE				TRUE													TRUE
Gohir.A01G053300	AT3G24730		mRNA splicing factor thioredoxin-like U5 snRNP																													TRUE				TRUE													TRUE
Gohir.A01G053400	AT1G78770	APC6	anaphase promoting complex 6																													TRUE				TRUE													TRUE
Gohir.A01G053500	AT1G78780		pathogenesis-related family protein																													TRUE				TRUE													TRUE
Gohir.A01G053600	AT1G78780		pathogenesis-related family protein																													TRUE				TRUE													TRUE
Gohir.A01G053700	AT1G78800		UDP-Glycosyltransferase superfamily protein		TRUE	TRUE																										TRUE				TRUE													TRUE
Gohir.A01G053800	AT1G16916																															TRUE				TRUE													TRUE
Gohir.A01G053900	AT2G26580	YAB5	plant-specific transcription factor YABBY family protein		TRUE																											TRUE				TRUE													TRUE
Gohir.A01G054000	AT1G53320	AtTLP7,TLP7	tubby like protein 7																													TRUE				TRUE													TRUE
Gohir.A01G054100	AT2G42680	ATMBF1A,MBF1A	multiprotein bridging factor 1A			TRUE																										TRUE				TRUE													TRUE
Gohir.A01G054200	AT1G78810			TRUE	TRUE																											TRUE				TRUE													TRUE
Gohir.A01G054300	AT3G14890		phosphoesterase	TRUE	TRUE																											TRUE				TRUE													TRUE
Gohir.A01G054400	AT3G14910				TRUE																											TRUE				TRUE													TRUE
Gohir.A01G054500	AT3G05660	AtRLP33,RLP33	receptor like protein 33	TRUE	TRUE																											TRUE				TRUE													TRUE
Gohir.A01G054600	AT5G25910	AtRLP52,RLP52	receptor like protein 52																													TRUE				TRUE													TRUE
Gohir.A01G054700	AT1G45616	AtRLP6,RLP6	receptor like protein 6	TRUE	TRUE																											TRUE				TRUE													TRUE
Gohir.A01G054800	AT1G45616	AtRLP6,RLP6	receptor like protein 6	TRUE	TRUE																											TRUE				TRUE													TRUE
Gohir.A01G054900	AT5G44700	EDA23,GSO2	Leucine-rich repeat transmembrane protein kinase																													TRUE				TRUE													TRUE
Gohir.A01G055000	AT3G14920		Peptide-N4-(N-acetyl-beta-glucosaminyl)asparagine amidase A protein		TRUE																											TRUE				TRUE													TRUE
Gohir.A01G055100	AT3G14930	HEME1	Uroporphyrinogen decarboxylase	TRUE	TRUE																											TRUE				TRUE													TRUE
Gohir.A01G055200	AT2G42610	LSH10	Protein of unknown function (DUF640)																													TRUE				TRUE													TRUE
Gohir.A01G055300	AT1G78830		Curculin-like (mannose-binding) lectin family protein																													TRUE				TRUE													TRUE
Gohir.A01G055400	AT1G78860		D-mannose binding lectin protein with Apple-like carbohydrate-binding domain	TRUE	TRUE																											TRUE				TRUE													TRUE
Gohir.A01G055500	AT1G78860		D-mannose binding lectin protein with Apple-like carbohydrate-binding domain																													TRUE				TRUE													TRUE
Gohir.A01G055600					TRUE																											TRUE				TRUE													TRUE
Gohir.A01G055700					TRUE																											TRUE				TRUE													TRUE
Gohir.A01G055800	AT3G14940	ATPPC3,PPC3	phosphoenolpyruvate carboxylase 3																													TRUE				TRUE													TRUE
Gohir.A01G055900	AT5G45880		Pollen Ole e 1 allergen and extensin family protein	TRUE	TRUE																											TRUE				TRUE													TRUE
Gohir.A01G056000				TRUE	TRUE																											TRUE				TRUE													TRUE
Gohir.A01G056100	AT1G78870	UBC13A,UBC35	ubiquitin-conjugating enzyme 35																													TRUE				TRUE													TRUE
Gohir.A01G056200	AT1G53300	TTL1	tetratricopetide-repeat thioredoxin-like 1	TRUE	TRUE																											TRUE				TRUE													TRUE
Gohir.A01G056300	AT3G25730	EDF3	ethylene response DNA binding factor 3																													TRUE				TRUE													TRUE
Gohir.A01G056400	AT3G25730	EDF3	ethylene response DNA binding factor 3	TRUE	TRUE																											TRUE				TRUE													TRUE
Gohir.A01G056500	AT1G53290		Galactosyltransferase family protein		TRUE	TRUE																										TRUE				TRUE													TRUE
Gohir.A01G056600	AT4G24290		MAC/Perforin domain-containing protein																													TRUE				TRUE													TRUE
Gohir.A01G056700	AT1G53280		Class I glutamine amidotransferase-like superfamily protein	TRUE	TRUE	TRUE																										TRUE				TRUE													TRUE
Gohir.A01G056800	AT1G12740	CYP87A2	cytochrome P450 family 87 subfamily A polypeptide 2	TRUE	TRUE																											TRUE				TRUE													TRUE
Gohir.A01G056900	AT1G12740	CYP87A2	cytochrome P450 family 87 subfamily A polypeptide 2	TRUE	TRUE																											TRUE				TRUE													TRUE
Gohir.A01G057000	AT1G53270		ABC-2 type transporter family protein																													TRUE				TRUE													TRUE
Gohir.A01G057100	AT3G15000		cobalt ion binding		TRUE																											TRUE				TRUE													TRUE
Gohir.A01G057200																																TRUE				TRUE													TRUE
Gohir.A01G057300	AT2G20950		Arabidopsis phospholipase-like protein (PEARLI 4) family																													TRUE				TRUE													TRUE
Gohir.A01G057400					TRUE																											TRUE				TRUE													TRUE
Gohir.A01G057500				TRUE	TRUE																											TRUE				TRUE													TRUE
Gohir.A01G057600				TRUE	TRUE																											TRUE				TRUE													TRUE
Gohir.A01G057700	AT3G15020	mMDH2	Lactate/malate dehydrogenase family protein																													TRUE				TRUE													TRUE
Gohir.A01G057800	AT3G15010		RNA-binding (RRM/RBD/RNP motifs) family protein																													TRUE				TRUE													TRUE
Gohir.A01G057900	AT1G06230	GTE4	global transcription factor group E4																													TRUE				TRUE													TRUE
Gohir.A01G058000	AT2G31085	CLE6	CLAVATA3/ESR-RELATED 6		TRUE																											TRUE				TRUE													TRUE
Gohir.A01G058100																																TRUE				TRUE													TRUE
Gohir.A01G058200																																TRUE				TRUE													TRUE
Gohir.A01G058300	AT5G15110		Pectate lyase family protein	TRUE	TRUE																											TRUE				TRUE													TRUE
Gohir.A01G058400	AT3G47570		Leucine-rich repeat protein kinase family protein																													TRUE				TRUE													TRUE
Gohir.A01G058500					TRUE																											TRUE				TRUE													TRUE
Gohir.A01G058600	AT1G73170		P-loop containing nucleoside triphosphate hydrolases superfamily protein																													TRUE				TRUE													TRUE
Gohir.A01G058700																																TRUE				TRUE													TRUE
Gohir.A01G058800	AT1G53230	TCP3	TEOSINTE BRANCHED 1 cycloidea and PCF transcription factor 3	TRUE	TRUE	TRUE																										TRUE				TRUE													TRUE
Gohir.A01G058900	AT3G15050	IQD10	IQ-domain 10	TRUE	TRUE																											TRUE				TRUE													TRUE
Gohir.A01G059000	AT2G34010																															TRUE				TRUE													TRUE
Gohir.A01G059100	AT1G53210		sodium/calcium exchanger family protein / calcium-binding EF hand family protein	TRUE	TRUE																											TRUE				TRUE													TRUE
Gohir.A01G059200	AT3G56320		PAP/OAS1 substrate-binding domain superfamily																													TRUE				TRUE													TRUE
Gohir.A01G059300	AT3G58120	ATBZIP61,BZIP61	Basic-leucine zipper (bZIP) transcription factor family protein		TRUE	TRUE																										TRUE				TRUE													TRUE
Gohir.A01G059400	AT5G54080	HGO	homogentisate 12-dioxygenase																													TRUE				TRUE													TRUE
Gohir.A01G059500	AT5G60860	AtRABA1f,RABA1f	RAB GTPase homolog A1F																													TRUE				TRUE													TRUE
Gohir.A01G059600	AT4G27560		UDP-Glycosyltransferase superfamily protein	TRUE	TRUE																											TRUE				TRUE													TRUE
Gohir.A01G059700	AT4G27560		UDP-Glycosyltransferase superfamily protein																													TRUE				TRUE													TRUE
Gohir.A01G059800	AT1G53190		RING/U-box superfamily protein	TRUE	TRUE																											TRUE				TRUE													TRUE
Gohir.A01G059900	AT5G46020																															TRUE				TRUE													TRUE
Gohir.A01G060000	AT3G18380		sequence-specific DNA binding transcription factors;sequence-specific DNA binding																													TRUE				TRUE													TRUE
Gohir.A01G060100	AT3G15090		GroES-like zinc-binding alcohol dehydrogenase family protein																													TRUE				TRUE													TRUE
Gohir.A01G060200	AT3G15095																															TRUE				TRUE													TRUE
Gohir.A01G060300	AT1G29900	CARB	carbamoyl phosphate synthetase B		TRUE																											TRUE				TRUE													TRUE
Gohir.A01G060400	AT3G15110																															TRUE				TRUE													TRUE
Gohir.A01G060500	AT3G15115																															TRUE				TRUE													TRUE
Gohir.A01G060600	AT5G54010		UDP-Glycosyltransferase superfamily protein	TRUE	TRUE																											TRUE				TRUE													TRUE
Gohir.A01G060700	AT4G16330		2-oxoglutarate (2OG) and Fe(II)-dependent oxygenase superfamily protein																													TRUE				TRUE													TRUE
Gohir.A01G060800	AT3G15120		P-loop containing nucleoside triphosphate hydrolases superfamily protein	TRUE	TRUE																											TRUE				TRUE													TRUE
Gohir.A01G060900	AT3G15140		Polynucleotidyl transferase ribonuclease H-like superfamily protein	TRUE	TRUE																											TRUE				TRUE													TRUE
Gohir.A01G061000	AT3G15150	ATMMS21,HPY2,MMS21	RING/U-box superfamily protein																													TRUE				TRUE													TRUE
Gohir.A01G061100	AT5G53980	ATHB52,HB52	homeobox protein 52	TRUE	TRUE																											TRUE				TRUE													TRUE
Gohir.A01G061200	AT5G53950	ANAC098,ATCUC2,CUC2	NAC (No Apical Meristem) domain transcriptional regulator superfamily protein	TRUE	TRUE																											TRUE				TRUE													TRUE
Gohir.A01G061300	AT5G53940		Yippee family putative zinc-binding protein																													TRUE				TRUE													TRUE
Gohir.A01G061400	AT5G53930				TRUE																											TRUE				TRUE													TRUE
Gohir.A01G061500	AT3G15220		Protein kinase superfamily protein	TRUE	TRUE	TRUE																										TRUE				TRUE													TRUE
Gohir.A01G061600	AT5G53900		Serine/threonine-protein kinase WNK (With No Lysine)-related	TRUE	TRUE																											TRUE				TRUE													TRUE
Gohir.A01G061700	AT1G53163																															TRUE				TRUE													TRUE
Gohir.A01G061800	AT3G15260		Protein phosphatase 2C family protein	TRUE	TRUE																											TRUE				TRUE													TRUE
Gohir.A01G061900	AT3G15270	SPL5	squamosa promoter binding protein-like 5																													TRUE				TRUE													TRUE
Gohir.A01G062000	AT3G15280				TRUE																											TRUE				TRUE													TRUE
Gohir.A01G062100	AT5G53890	AtPSKR2,PSKR2	phytosylfokine-alpha receptor 2	TRUE	TRUE																											TRUE				TRUE													TRUE
Gohir.A01G062200	AT4G38760		Protein of unknown function (DUF3414)																													TRUE				TRUE													TRUE
Gohir.A01G062300	AT2G46290		Transducin/WD40 repeat-like superfamily protein			TRUE																										TRUE				TRUE													TRUE
Gohir.A01G062400	AT5G53880				TRUE																											TRUE				TRUE													TRUE
Gohir.A01G062500	AT3G23560	ALF5	MATE efflux family protein	TRUE	TRUE																											TRUE				TRUE													TRUE
Gohir.A01G062600	AT1G43780	scpl44	serine carboxypeptidase-like 44	TRUE	TRUE																											TRUE				TRUE													TRUE
Gohir.A01G062700	AT5G48620		Disease resistance protein (CC-NBS-LRR class) family	TRUE	TRUE																											TRUE				TRUE													TRUE
Gohir.A01G062800	AT5G43470	HRT,RCY1,RPP8	Disease resistance protein (CC-NBS-LRR class) family	TRUE	TRUE																											TRUE				TRUE													TRUE
Gohir.A01G062900	AT1G50180		NB-ARC domain-containing disease resistance protein																													TRUE				TRUE													TRUE
Gohir.A01G063000	AT5G53850		haloacid dehalogenase-like hydrolase family protein		TRUE																											TRUE				TRUE													TRUE
Gohir.A01G063100	AT3G15300		VQ motif-containing protein			TRUE																										TRUE				TRUE													TRUE
Gohir.A01G063200	AT1G53140	DRP5A	Dynamin related protein 5A	TRUE	TRUE																											TRUE				TRUE													TRUE
Gohir.A01G063300	AT2G19130		S-locus lectin protein kinase family protein	TRUE	TRUE																											TRUE				TRUE													TRUE
Gohir.A01G063400	AT4G27500	PPI1	proton pump interactor 1	TRUE	TRUE																											TRUE				TRUE													TRUE
Gohir.A01G063500	AT3G15350		Core-2/I-branching beta-16-N-acetylglucosaminyltransferase family protein	TRUE	TRUE																											TRUE				TRUE													TRUE
Gohir.A01G063600	AT1G53040		Protein of unknown function (DUF616)	TRUE	TRUE																											TRUE				TRUE													TRUE
Gohir.A01G063700	AT1G53035																															TRUE				TRUE													TRUE
Gohir.A01G063800	AT3G15353	ATMT3,MT3	metallothionein 3	TRUE	TRUE																											TRUE				TRUE													TRUE
Gohir.A01G063900	AT3G15355	PFU1,UBC25	ubiquitin-conjugating enzyme 25		TRUE																											TRUE				TRUE													TRUE
Gohir.A01G064000	AT4G21700		Protein of unknown function (DUF2921)	TRUE	TRUE																											TRUE				TRUE													TRUE
Gohir.A01G064100	AT5G34885		Protein of unknown function (DUF784)																													TRUE				TRUE													TRUE
Gohir.A01G064200	AT1G69550		disease resistance protein (TIR-NBS-LRR class)																													TRUE				TRUE													TRUE
Gohir.A01G064300																																TRUE				TRUE													TRUE
Gohir.A01G064400	AT4G12010		Disease resistance protein (TIR-NBS-LRR class) family		TRUE																											TRUE				TRUE													TRUE
Gohir.A01G064500	AT4G27470	ATRMA3,RMA3	RING membrane-anchor 3																													TRUE				TRUE													TRUE
Gohir.A01G064600	AT3G15370	ATEXP12,ATEXPA12,ATHEXP ALPHA 1.24,EXP12,EXPA12	expansin 12																													TRUE				TRUE													TRUE
Gohir.A01G064700	AT4G21705		Tetratricopeptide repeat (TPR)-like superfamily protein																													TRUE				TRUE													TRUE
Gohir.A01G064800	AT1G31840		Tetratricopeptide repeat (TPR)-like superfamily protein	TRUE	TRUE																											TRUE				TRUE													TRUE
Gohir.A01G064900	AT5G07990	CYP75B1,D501,TT7	Cytochrome P450 superfamily protein																													TRUE				TRUE													TRUE
Gohir.A01G065000	AT3G15380		Plasma-membrane choline transporter family protein																													TRUE				TRUE													TRUE
Gohir.A01G065100	AT3G15390	SDE5	silencing defective 5	TRUE	TRUE																											TRUE				TRUE													TRUE
Gohir.A01G065200	AT3G15395																															TRUE				TRUE													TRUE
Gohir.A01G065300	AT1G26700	ATMLO14,MLO14	Seven transmembrane MLO family protein		TRUE																											TRUE				TRUE													TRUE
Gohir.A01G065400	AT5G53750		CBS domain-containing protein		TRUE																											TRUE				TRUE													TRUE
Gohir.A01G065500	AT4G27450		Aluminium induced protein with YGL and LRDR motifs		TRUE																											TRUE				TRUE													TRUE
Gohir.A01G065600	AT5G05520		Outer membrane OMP85 family protein	TRUE	TRUE																											TRUE				TRUE													TRUE
Gohir.A01G065700					TRUE																											TRUE				TRUE													TRUE
Gohir.A01G065800																																TRUE				TRUE													TRUE
Gohir.A01G065900																																TRUE				TRUE													TRUE
Gohir.A01G066000	AT1G52920	GCR2,GPCR	G protein coupled receptor		TRUE																											TRUE				TRUE													TRUE
Gohir.A01G066100	AT3G15470		Transducin/WD40 repeat-like superfamily protein			TRUE																										TRUE				TRUE													TRUE
Gohir.A01G066200	AT4G27435		Protein of unknown function (DUF1218)		TRUE																											TRUE				TRUE													TRUE
Gohir.A01G066300	AT4G27430	CIP7	COP1-interacting protein 7	TRUE	TRUE	TRUE																										TRUE				TRUE													TRUE
Gohir.A01G066400	AT1G52900		Toll-Interleukin-Resistance (TIR) domain family protein																													TRUE				TRUE													TRUE
Gohir.A01G066500	AT4G27420		ABC-2 type transporter family protein																													TRUE				TRUE													TRUE
Gohir.A01G066600																																TRUE				TRUE													TRUE
Gohir.A01G066700	AT4G27410	ANAC072,RD26	NAC (No Apical Meristem) domain transcriptional regulator superfamily protein	TRUE	TRUE																											TRUE				TRUE													TRUE
Gohir.A01G066800	AT3G15510	ANAC056,ATNAC2,NAC2,NARS1	NAC domain containing protein 2	TRUE	TRUE																											TRUE				TRUE													TRUE
Gohir.A01G066900	AT3G15518																															TRUE				TRUE													TRUE
Gohir.A01G067000	AT5G54440	AtTRS130,CLUB	CLUB	TRUE	TRUE																											TRUE				TRUE													TRUE
Gohir.A01G067100	AT3G16260	TRZ4	tRNAse Z4																													TRUE				TRUE													TRUE
Gohir.A01G067200	AT5G54400		S-adenosyl-L-methionine-dependent methyltransferases superfamily protein	TRUE	TRUE																											TRUE				TRUE													TRUE
Gohir.A01G067300	AT5G54390	AHL,ATAHL,HL	HAL2-like																													TRUE				TRUE													TRUE
Gohir.A01G067400	AT1G52855																															TRUE				TRUE													TRUE
Gohir.A01G067500	AT5G54380	THE1	protein kinase family protein		TRUE																											TRUE				TRUE													TRUE
Gohir.A01G067600	AT5G54370		Late embryogenesis abundant (LEA) protein-related																													TRUE				TRUE													TRUE
Gohir.A01G067700	AT2G37790		NAD(P)-linked oxidoreductase superfamily protein	TRUE	TRUE																											TRUE				TRUE													TRUE
Gohir.A01G067800	AT5G54370		Late embryogenesis abundant (LEA) protein-related	TRUE	TRUE																											TRUE				TRUE													TRUE
Gohir.A01G067900	AT5G54370		Late embryogenesis abundant (LEA) protein-related	TRUE	TRUE																											TRUE				TRUE													TRUE
Gohir.A01G068000					TRUE																											TRUE				TRUE													TRUE
Gohir.A01G068100																																TRUE				TRUE													TRUE
Gohir.A01G068200				TRUE	TRUE																											TRUE				TRUE													TRUE
Gohir.A01G068300	AT4G27390			TRUE	TRUE																											TRUE				TRUE													TRUE
Gohir.A01G068400	AT1G61260		Protein of unknown function (DUF761)	TRUE	TRUE																											TRUE				TRUE													TRUE
Gohir.A01G068500	AT2G30470	HSI2,VAL1	high-level expression of sugar-inducible gene 2		TRUE																											TRUE				TRUE													TRUE
Gohir.A01G068600	AT4G27380																															TRUE				TRUE													TRUE
Gohir.A01G068700																																TRUE				TRUE													TRUE
Gohir.A01G068800	AT5G54280	ATM2,ATM4,ATMYOS1	myosin 2		TRUE	TRUE																										TRUE				TRUE													TRUE
Gohir.A01G068900	AT5G54270	LHCB3,LHCB3*1	light-harvesting chlorophyll B-binding protein 3																													TRUE				TRUE													TRUE
Gohir.A01G069000	AT5G54250	ATCNGC4,CNGC4,DND2,HLM1	cyclic nucleotide-gated cation channel 4																													TRUE				TRUE													TRUE
Gohir.A01G069100	AT4G27360		Dynein light chain type 1 family protein	TRUE	TRUE																											TRUE				TRUE													TRUE
Gohir.A01G069200	AT5G54110	ATMAMI,MAMI	membrane-associated mannitol-induced		TRUE																											TRUE				TRUE													TRUE
Gohir.A01G069300	AT4G10265		Wound-responsive family protein																													TRUE				TRUE													TRUE
Gohir.A01G069400	AT4G10270		Wound-responsive family protein	TRUE	TRUE																											TRUE				TRUE													TRUE
Gohir.A01G069500	AT2G20900	ATDGK5,DGK5	diacylglycerol kinase 5		TRUE																											TRUE				TRUE													TRUE
Gohir.A01G069600	AT4G21440	ATM4,ATMYB102,MYB102	MYB-like 102																													TRUE				TRUE													TRUE
Gohir.A01G069700	AT5G08240			TRUE	TRUE																											TRUE				TRUE													TRUE
Gohir.A01G069800	AT4G27340		Met-10+ like family protein																													TRUE				TRUE													TRUE
Gohir.A01G069900	AT4G27330	NZZ,SPL	sporocyteless (SPL)				TRUE																									TRUE				TRUE													TRUE
Gohir.A01G070000	AT1G11360		Adenine nucleotide alpha hydrolases-like superfamily protein	TRUE	TRUE																											TRUE				TRUE													TRUE
Gohir.A01G070100	AT4G27310		B-box type zinc finger family protein																													TRUE				TRUE													TRUE
Gohir.A01G070200	AT4G27280		Calcium-binding EF-hand family protein																													TRUE				TRUE													TRUE
Gohir.A01G070300	AT4G03230		S-locus lectin protein kinase family protein																													TRUE				TRUE													TRUE
Gohir.A01G070400	AT4G27300		S-locus lectin protein kinase family protein		TRUE																											TRUE				TRUE													TRUE
Gohir.A01G070500	AT4G27290		S-locus lectin protein kinase family protein																													TRUE				TRUE													TRUE
Gohir.A01G070600	AT4G27290		S-locus lectin protein kinase family protein	TRUE	TRUE	TRUE																										TRUE				TRUE													TRUE
Gohir.A01G070700	AT4G21380	ARK3,RK3	receptor kinase 3																													TRUE				TRUE													TRUE
Gohir.A01G070800	AT4G27290		S-locus lectin protein kinase family protein	TRUE	TRUE																											TRUE				TRUE													TRUE
Gohir.A01G070900	AT4G27280		Calcium-binding EF-hand family protein																													TRUE				TRUE													TRUE
Gohir.A01G071000	AT4G27290		S-locus lectin protein kinase family protein	TRUE	TRUE																											TRUE				TRUE													TRUE
Gohir.A01G071100	AT4G27290		S-locus lectin protein kinase family protein	TRUE	TRUE																											TRUE				TRUE													TRUE
Gohir.A01G071200	AT4G27290		S-locus lectin protein kinase family protein	TRUE	TRUE																											TRUE				TRUE													TRUE
Gohir.A01G071300	AT4G27220		NB-ARC domain-containing disease resistance protein	TRUE	TRUE																											TRUE				TRUE													TRUE
Gohir.A01G071400	AT4G27270		Quinone reductase family protein		TRUE	TRUE																										TRUE				TRUE													TRUE
Gohir.A01G071500	AT3G20640		basic helix-loop-helix (bHLH) DNA-binding superfamily protein	TRUE	TRUE																											TRUE				TRUE													TRUE
Gohir.A01G071600	AT5G54520		Transducin/WD40 repeat-like superfamily protein		TRUE																											TRUE				TRUE													TRUE
Gohir.A01G071700	AT5G54510	DFL1,GH3.6	Auxin-responsive GH3 family protein	TRUE	TRUE																											TRUE				TRUE													TRUE
Gohir.A01G071800	AT5G54510	DFL1,GH3.6	Auxin-responsive GH3 family protein	TRUE	TRUE																											TRUE				TRUE													TRUE
Gohir.A01G071900					TRUE																											TRUE				TRUE													TRUE
Gohir.A01G072000	AT3G50950	ZAR1	HOPZ-ACTIVATED RESISTANCE 1	TRUE	TRUE																											TRUE				TRUE													TRUE
Gohir.A01G072100	AT5G54530		Protein of unknown function, DUF538																													TRUE				TRUE													TRUE
Gohir.A01G072200	AT3G20650		mRNA capping enzyme family protein	TRUE	TRUE																											TRUE				TRUE													TRUE
Gohir.A01G072300	AT5G54585				TRUE																											TRUE				TRUE													TRUE
Gohir.A01G072400	AT3G20660	4-Oct,AtOCT4	organic cation/carnitine transporter4	TRUE	TRUE																											TRUE				TRUE													TRUE
Gohir.A01G072500	AT3G47810	ATVPS29,MAG1,VPS29	Calcineurin-like metallo-phosphoesterase superfamily protein																													TRUE				TRUE													TRUE
Gohir.A01G072600					TRUE																											TRUE				TRUE													TRUE
Gohir.A01G072700	AT5G23960	ATTPS21,TPS21	terpene synthase 21	TRUE	TRUE																											TRUE				TRUE													TRUE
Gohir.A01G072800	AT5G48150	PAT1	GRAS family transcription factor	TRUE	TRUE																											TRUE				TRUE													TRUE
Gohir.A01G072900	AT5G54590	CRLK1	Protein kinase superfamily protein						TRUE																							TRUE				TRUE													TRUE
Gohir.A01G073000	AT5G54600		Translation protein SH3-like family protein						TRUE																							TRUE				TRUE													TRUE
Gohir.A01G073100	AT1G65290	mtACP2	mitochondrial acyl carrier protein 2						TRUE																							TRUE				TRUE													TRUE
Gohir.A01G073200	AT1G65290	mtACP2	mitochondrial acyl carrier protein 2																													TRUE				TRUE													TRUE
Gohir.A01G073300	AT4G27250		NAD(P)-binding Rossmann-fold superfamily protein			TRUE																										TRUE				TRUE													TRUE
Gohir.A01G073400	AT5G54630		zinc finger protein-related	TRUE	TRUE																											TRUE				TRUE													TRUE
Gohir.A01G073500	AT2G32280		Protein of unknown function (DUF1218)	TRUE	TRUE																											TRUE				TRUE													TRUE
Gohir.A01G073600	AT5G54660		HSP20-like chaperones superfamily protein																													TRUE				TRUE													TRUE
Gohir.A01G073700	AT5G54670	ATK3,KATC	kinesin 3																													TRUE				TRUE													TRUE
Gohir.A01G073800					TRUE																											TRUE				TRUE													TRUE
Gohir.A01G073900	AT1G11530	ATCXXS1,CXXS1	C-terminal cysteine residue is changed to a serine 1																													TRUE				TRUE													TRUE
Gohir.A01G074000	AT5G54680	bHLH105,ILR3	basic helix-loop-helix (bHLH) DNA-binding superfamily protein		TRUE																											TRUE				TRUE													TRUE
Gohir.A01G074100	AT3G20680		Domain of unknown function (DUF1995)																													TRUE				TRUE													TRUE
Gohir.A01G074200	AT5G54690	GAUT12,IRX8,LGT6	galacturonosyltransferase 12																													TRUE				TRUE													TRUE
Gohir.A01G074300	AT5G54730	ATATG18F,ATG18F,G18F	homolog of yeast autophagy 18 (ATG18) F	TRUE	TRUE																											TRUE				TRUE													TRUE
Gohir.A01G074400	AT3G20720																															TRUE				TRUE													TRUE
Gohir.A01G074500	AT4G03500		Ankyrin repeat family protein		TRUE																											TRUE				TRUE													TRUE
Gohir.A01G074600	AT4G04790		Tetratricopeptide repeat (TPR)-like superfamily protein	TRUE	TRUE																											TRUE				TRUE													TRUE
Gohir.A01G074700				TRUE	TRUE																											TRUE				TRUE													TRUE
Gohir.A01G074800	AT3G20600	NDR1	Late embryogenesis abundant (LEA) hydroxyproline-rich glycoprotein family	TRUE	TRUE																											TRUE				TRUE													TRUE
Gohir.A01G074900	AT4G21200	ATGA2OX8,GA2OX8	gibberellin 2-oxidase 8																													TRUE				TRUE													TRUE
Gohir.A01G075000	AT4G05320	UBQ10	polyubiquitin 10		TRUE																											TRUE				TRUE													TRUE
Gohir.A01G075100	AT4G05320	UBQ10	polyubiquitin 10																													TRUE				TRUE													TRUE
Gohir.A01G075200	AT4G27160	AT2S3,SESA3	seed storage albumin 3					TRUE																								TRUE				TRUE													TRUE
Gohir.A01G075300	AT1G54290		Translation initiation factor SUI1 family protein																													TRUE				TRUE													TRUE
Gohir.A01G075400	AT2G46410	CPC	Homeodomain-like superfamily protein		TRUE																											TRUE				TRUE													TRUE
Gohir.A01G075500	AT4G27120																															TRUE				TRUE													TRUE
Gohir.A01G075600	AT1G54290		Translation initiation factor SUI1 family protein																													TRUE				TRUE													TRUE
Gohir.A01G075700	AT5G54770	THI1,THI4,TZ	thiazole biosynthetic enzyme, chloroplast (ARA6) (THI1) (THI4)																													TRUE				TRUE													TRUE
Gohir.A01G075800	AT3G20580	COBL10	COBRA-like protein 10 precursor	TRUE	TRUE																											TRUE				TRUE													TRUE
Gohir.A01G075900	AT4G27100		Ypt/Rab-GAP domain of gyp1p superfamily protein																													TRUE				TRUE													TRUE
Gohir.A01G076000	AT1G09560	GLP5	germin-like protein 5																													TRUE				TRUE													TRUE
Gohir.A01G076100	AT1G09560	GLP5	germin-like protein 5																													TRUE				TRUE													TRUE
Gohir.A01G076200	AT1G50940	ETFALPHA	electron transfer flavoprotein alpha																													TRUE				TRUE													TRUE
Gohir.A01G076300	AT5G54790																															TRUE				TRUE													TRUE
Gohir.A01G076400	AT3G15160																															TRUE				TRUE													TRUE
Gohir.A01G076500	AT3G15160			TRUE	TRUE																											TRUE				TRUE													TRUE
Gohir.A01G076600	AT1G40087		Plant transposase (Ptta/En/Spm family)																													TRUE				TRUE													TRUE
Gohir.A01G076700	AT2G03200		Eukaryotic aspartyl protease family protein																													TRUE				TRUE													TRUE
Gohir.A01G076800	AT5G54800	ATGPT1,GPT1	glucose 6-phosphate/phosphate translocator 1																													TRUE				TRUE													TRUE
Gohir.A01G076900	AT5G54840	ATSGP1,SGP1	Ras-related small GTP-binding family protein			TRUE																										TRUE				TRUE													TRUE
Gohir.A01G077000	AT1G50910			TRUE	TRUE																											TRUE				TRUE													TRUE
Gohir.A01G077100	AT1G65700		Small nuclear ribonucleoprotein family protein																													TRUE				TRUE													TRUE
Gohir.A01G077200	AT3G47860	CHL	chloroplastic lipocalin																													TRUE				TRUE													TRUE
Gohir.A01G077300	AT1G50900		Ankyrin repeat family protein																													TRUE				TRUE													TRUE
Gohir.A01G077400	AT3G59240		RNI-like superfamily protein																													TRUE				TRUE													TRUE
Gohir.A01G077500	AT3G59200		F-box/RNI-like superfamily protein																													TRUE				TRUE													TRUE
Gohir.A01G077600																																TRUE				TRUE													TRUE
Gohir.A01G077700	AT3G59240		RNI-like superfamily protein																													TRUE				TRUE													TRUE
Gohir.A01G077800	AT4G21780				TRUE																											TRUE				TRUE													TRUE
Gohir.A01G077900	AT5G54850			TRUE	TRUE																											TRUE				TRUE													TRUE
Gohir.A01G078000	AT4G27060	CN,SPR2,TOR1	ARM repeat superfamily protein	TRUE	TRUE																											TRUE				TRUE													TRUE
Gohir.A01G078100	AT1G50840	POLGAMMA2	polymerase gamma 2																													TRUE				TRUE													TRUE
Gohir.A01G078200																																TRUE				TRUE													TRUE
Gohir.A01G078300	AT2G36800	DOGT1,UGT73C5	don-glucosyltransferase 1																													TRUE				TRUE													TRUE
Gohir.A01G078400	AT3G20530		Protein kinase superfamily protein		TRUE	TRUE																										TRUE				TRUE													TRUE
Gohir.A01G078500	AT5G54855		Pollen Ole e 1 allergen and extensin family protein																													TRUE				TRUE													TRUE
Gohir.A01G078600	AT4G27040	VPS22	EAP30/Vps36 family protein		TRUE																											TRUE				TRUE													TRUE
Gohir.A01G078700	AT4G27030	FAD4,FADA	fatty acid desaturase A																													TRUE				TRUE													TRUE
Gohir.A01G078800	AT4G27020			TRUE	TRUE																											TRUE				TRUE													TRUE
Gohir.A01G078900	AT5G36110	CYP716A1	cytochrome P450, family 716, subfamily A, polypeptide 1	TRUE	TRUE																											TRUE				TRUE													TRUE
Gohir.A01G079000	AT1G50740		Transmembrane proteins 14C																													TRUE				TRUE													TRUE
Gohir.A01G079100	AT4G27000	ATRBP45C	RNA-binding (RRM/RBD/RNP motifs) family protein	TRUE	TRUE																											TRUE				TRUE													TRUE
Gohir.A01G079200	AT4G30580	ATS2,EMB1995,LPAT1	Phospholipid/glycerol acyltransferase family protein	TRUE	TRUE	TRUE																										TRUE				TRUE													TRUE
Gohir.A01G079300	AT3G20340			TRUE	TRUE																											TRUE				TRUE													TRUE
Gohir.A01G079400	AT1G50660																															TRUE				TRUE													TRUE
Gohir.A01G079500	AT1G50670		OTU-like cysteine protease family protein	TRUE	TRUE																											TRUE				TRUE													TRUE
Gohir.A01G079600	AT3G20395		RING/U-box superfamily protein		TRUE																											TRUE				TRUE													TRUE
Gohir.A01G079700	AT3G20410	CPK9	calmodulin-domain protein kinase 9																													TRUE				TRUE													TRUE
Gohir.A01G079800	AT5G54940		Translation initiation factor SUI1 family protein		TRUE																											TRUE				TRUE													TRUE
Gohir.A01G079900	AT4G26980		RNI-like superfamily protein																													TRUE				TRUE													TRUE
Gohir.A01G080000	AT1G20970				TRUE																											TRUE				TRUE													TRUE
Gohir.A01G080100	AT4G26965		NADH:ubiquinone oxidoreductase, 17.2kDa subunit	TRUE	TRUE																											TRUE				TRUE													TRUE
Gohir.A01G080200	AT1G15700	ATPC2	ATPase, F1 complex, gamma subunit protein																													TRUE				TRUE													TRUE
Gohir.A01G080300	AT5G54970				TRUE																											TRUE				TRUE													TRUE
Gohir.A01G080400	AT4G04630		Protein of unknown function, DUF584																													TRUE				TRUE													TRUE
Gohir.A01G080500	AT4G38460	GGR	geranylgeranyl reductase	TRUE	TRUE	TRUE																										TRUE				TRUE													TRUE
Gohir.A01G080600	AT4G26940		Galactosyltransferase family protein																													TRUE				TRUE													TRUE
Gohir.A01G080700	AT4G26930	AtMYB97,MYB97	myb domain protein 97	TRUE	TRUE																											TRUE				TRUE													TRUE
Gohir.A01G080800																																TRUE				TRUE													TRUE
Gohir.A01G080900	AT3G20480		tetraacyldisaccharide 4\'-kinase family protein		TRUE																											TRUE				TRUE													TRUE
Gohir.A01G081000																																TRUE				TRUE													TRUE
Gohir.A01G081100	AT5G55050		GDSL-like Lipase/Acylhydrolase superfamily protein			TRUE																										TRUE		TRUE	TRUE	TRUE													TRUE
Gohir.A01G081200	AT5G55060																															TRUE		TRUE	TRUE	TRUE													TRUE
Gohir.A01G081300	AT1G50732			TRUE	TRUE																											TRUE		TRUE	TRUE	TRUE													TRUE
Gohir.A01G081400				TRUE	TRUE																											TRUE		TRUE	TRUE	TRUE													TRUE
Gohir.A01G081500	AT1G11905		B-cell receptor-associated protein 31-like																													TRUE		TRUE	TRUE	TRUE													TRUE
Gohir.A01G081600	AT1G11905		B-cell receptor-associated protein 31-like																													TRUE		TRUE	TRUE	TRUE													TRUE
Gohir.A01G081700	AT1G11905		B-cell receptor-associated protein 31-like																													TRUE		TRUE	TRUE	TRUE													TRUE
Gohir.A01G081800	AT1G11905		B-cell receptor-associated protein 31-like																													TRUE		TRUE	TRUE	TRUE													TRUE
Gohir.A01G081900	AT1G11905		B-cell receptor-associated protein 31-like																													TRUE		TRUE	TRUE	TRUE													TRUE
Gohir.A01G082000				TRUE	TRUE																											TRUE		TRUE	TRUE	TRUE													TRUE
Gohir.A01G082100	AT5G42570		B-cell receptor-associated 31-like																													TRUE		TRUE	TRUE	TRUE													TRUE
Gohir.A01G082200	AT5G55090	MAPKKK15	mitogen-activated protein kinase kinase kinase 15	TRUE	TRUE																											TRUE		TRUE	TRUE	TRUE													TRUE
Gohir.A01G082300	AT1G62290		Saposin-like aspartyl protease family protein	TRUE	TRUE																											TRUE		TRUE	TRUE	TRUE													TRUE
Gohir.A01G082400	AT1G62300	ATWRKY6,WRKY6	WRKY family transcription factor		TRUE																											TRUE		TRUE	TRUE	TRUE													TRUE
Gohir.A01G082500	AT1G50730			TRUE	TRUE																											TRUE		TRUE	TRUE	TRUE													TRUE
Gohir.A01G082600	AT1G50720		Stigma-specific Stig1 family protein																													TRUE		TRUE	TRUE	TRUE													TRUE
Gohir.A01G082700	AT1G11925		Stigma-specific Stig1 family protein																													TRUE		TRUE	TRUE	TRUE													TRUE
Gohir.A01G082800	AT1G11925		Stigma-specific Stig1 family protein																													TRUE		TRUE	TRUE	TRUE													TRUE
Gohir.A01G082900																																TRUE		TRUE	TRUE	TRUE													TRUE
Gohir.A01G083000																																TRUE		TRUE	TRUE	TRUE													TRUE
Gohir.A01G083100	AT2G41640		Glycosyltransferase family 61 protein	TRUE	TRUE	TRUE																										TRUE		TRUE	TRUE	TRUE													TRUE
Gohir.A01G083200																																TRUE		TRUE	TRUE	TRUE													TRUE
Gohir.A01G083300	AT4G26850	VTC2	mannose-1-phosphate guanylyltransferase (GDP)s;GDP-galactose:mannose-1-phosphate guanylyltransferases;GDP-galactose:glucose-1-phosphate guanylyltransferases;GDP-galactose:myoinositol-1-phosphate guanylyltransferases;glucose-1-phosphate guanylyltransferase		TRUE																											TRUE		TRUE	TRUE	TRUE													TRUE
Gohir.A01G083400	AT2G32990	AtGH9B8,GH9B8	glycosyl hydrolase 9B8	TRUE	TRUE																											TRUE		TRUE	TRUE	TRUE													TRUE
Gohir.A01G083500	AT1G50650		Stigma-specific Stig1 family protein	TRUE	TRUE																											TRUE		TRUE	TRUE	TRUE													TRUE
Gohir.A01G083600	AT5G55180		O-Glycosyl hydrolases family 17 protein		TRUE																											TRUE		TRUE	TRUE	TRUE													TRUE
Gohir.A01G083700	AT5G55180		O-Glycosyl hydrolases family 17 protein	TRUE	TRUE																											TRUE		TRUE	TRUE	TRUE													TRUE
Gohir.A01G083800	AT3G20310	ATERF-7,ATERF7,ERF7	ethylene response factor 7		TRUE																											TRUE		TRUE	TRUE	TRUE													TRUE
Gohir.A01G083900	AT3G20300		Protein of unknown function (DUF3537)	TRUE	TRUE																											TRUE		TRUE	TRUE	TRUE													TRUE
Gohir.A01G084000	AT3G20290	ATEHD1,EHD1	EPS15 homology domain 1																													TRUE		TRUE	TRUE	TRUE													TRUE
Gohir.A01G084100																																TRUE		TRUE	TRUE	TRUE													TRUE
Gohir.A01G084200	AT4G26790		GDSL-like Lipase/Acylhydrolase superfamily protein																													TRUE		TRUE	TRUE	TRUE													TRUE
Gohir.A01G084300	AT5G55200		Co-chaperone GrpE family protein	TRUE	TRUE																											TRUE		TRUE	TRUE	TRUE													TRUE
Gohir.A01G084400	AT5G55210				TRUE																											TRUE		TRUE	TRUE	TRUE													TRUE
Gohir.A01G084500	AT5G55220		trigger factor type chaperone family protein		TRUE																											TRUE		TRUE	TRUE	TRUE													TRUE
Gohir.A01G084600	AT4G22340	CDS2	cytidinediphosphate diacylglycerol synthase 2																													TRUE		TRUE	TRUE	TRUE													TRUE
Gohir.A01G084700	AT4G26760	MAP65-2	microtubule-associated protein 65-2	TRUE	TRUE																											TRUE		TRUE	TRUE	TRUE													TRUE
Gohir.A01G084800	AT4G26750		hydroxyproline-rich glycoprotein family protein	TRUE	TRUE																											TRUE		TRUE	TRUE	TRUE													TRUE
Gohir.A01G084900	AT5G55250	IAMT1	IAA carboxylmethyltransferase 1		TRUE																											TRUE		TRUE	TRUE	TRUE													TRUE
Gohir.A01G085000				TRUE	TRUE																											TRUE		TRUE	TRUE	TRUE													TRUE
Gohir.A01G085100	AT5G55280	ATFTSZ1-1,CPFTSZ,FTSZ1-1	homolog of bacterial cytokinesis Z-ring protein FTSZ 1-1	TRUE	TRUE																											TRUE		TRUE	TRUE	TRUE													TRUE
Gohir.A01G085200	AT1G16240	ATSYP51,SYP51	syntaxin of plants 51		TRUE																											TRUE		TRUE	TRUE	TRUE													TRUE
Gohir.A01G085300	AT5G55390	EDM2	ENHANCED DOWNY MILDEW 2	TRUE	TRUE																											TRUE		TRUE	TRUE	TRUE													TRUE
Gohir.A01G085400	AT4G26700	ATFIM1,FIM1	fimbrin 1		TRUE																											TRUE		TRUE	TRUE	TRUE													TRUE
Gohir.A01G085500	AT5G55410		Bifunctional inhibitor/lipid-transfer protein/seed storage 2S albumin superfamily protein		TRUE																											TRUE		TRUE	TRUE	TRUE													TRUE
Gohir.A01G085600	AT5G55470	ATNHX3,NHX3	Na+/H+ (sodium hydrogen) exchanger 3	TRUE	TRUE																											TRUE		TRUE	TRUE	TRUE													TRUE
Gohir.A01G085700	AT5G55480	SVL1	SHV3-like 1																													TRUE		TRUE	TRUE	TRUE													TRUE
Gohir.A01G085800	AT1G50590		RmlC-like cupins superfamily protein	TRUE	TRUE																											TRUE		TRUE	TRUE	TRUE													TRUE
Gohir.A01G085900	AT5G55500	ATXYLT,XYLT	beta-12-xylosyltransferase																													TRUE		TRUE	TRUE	TRUE													TRUE
Gohir.A01G086000	AT5G59240		Ribosomal protein S8e family protein		TRUE	TRUE																										TRUE		TRUE	TRUE	TRUE													TRUE
Gohir.A01G086100																																TRUE		TRUE	TRUE	TRUE													TRUE
Gohir.A01G086200	AT1G50575		Putative lysine decarboxylase family protein	TRUE	TRUE																											TRUE		TRUE	TRUE	TRUE													TRUE
Gohir.A01G086300	AT3G06130		Heavy metal transport/detoxification superfamily protein		TRUE																											TRUE		TRUE	TRUE	TRUE													TRUE
Gohir.A01G086400	AT4G26670		Mitochondrial import inner membrane translocase subunit Tim17/Tim22/Tim23 family protein																													TRUE		TRUE	TRUE	TRUE													TRUE
Gohir.A01G086500	AT5G55530		Calcium-dependent lipid-binding (CaLB domain) family protein	TRUE	TRUE	TRUE																										TRUE		TRUE	TRUE	TRUE													TRUE
Gohir.A01G086600	AT5G55540	LOP1,TRN1	tornado 1	TRUE	TRUE																											TRUE		TRUE	TRUE	TRUE													TRUE
Gohir.A01G086700	AT3G07810		RNA-binding (RRM/RBD/RNP motifs) family protein	TRUE	TRUE																											TRUE		TRUE	TRUE	TRUE													TRUE
Gohir.A01G086800	AT2G26730		Leucine-rich repeat protein kinase family protein	TRUE	TRUE																											TRUE		TRUE	TRUE	TRUE													TRUE
Gohir.A01G086900	AT5G55560		Protein kinase superfamily protein	TRUE	TRUE																											TRUE		TRUE	TRUE	TRUE													TRUE
Gohir.A01G087000	AT4G26640	AtWRKY20,WRKY20	WRKY family transcription factor family protein																													TRUE		TRUE	TRUE	TRUE													TRUE
Gohir.A01G087100	AT1G50600	SCL5	scarecrow-like 5																													TRUE		TRUE	TRUE	TRUE													TRUE
Gohir.A01G087200	AT2G17030		F-box family protein with a domain of unknown function (DUF295)		TRUE																											TRUE		TRUE	TRUE	TRUE													TRUE
Gohir.A01G087300	AT5G55570			TRUE	TRUE																											TRUE		TRUE	TRUE	TRUE													TRUE
Gohir.A01G087400	AT2G05160		CCCH-type zinc fingerfamily protein with RNA-binding domain		TRUE																											TRUE		TRUE	TRUE	TRUE													TRUE
Gohir.A01G087500	AT3G07100	ERMO2,SEC24A	Sec23/Sec24 protein transport family protein	TRUE	TRUE																											TRUE		TRUE	TRUE	TRUE													TRUE
Gohir.A01G087600	AT3G05660	AtRLP33,RLP33	receptor like protein 33	TRUE	TRUE																											TRUE		TRUE	TRUE	TRUE													TRUE
Gohir.A01G087700	AT4G16447																															TRUE		TRUE	TRUE	TRUE													TRUE
Gohir.A01G087800	AT1G55930		CBS domain-containing protein / transporter associated domain-containing protein																													TRUE		TRUE	TRUE	TRUE													TRUE
Gohir.A01G087900	AT1G13110	CYP71B7	cytochrome P450 family 71 subfamily B polypeptide 7	TRUE	TRUE	TRUE																										TRUE		TRUE	TRUE	TRUE													TRUE
Gohir.A01G088000					TRUE																											TRUE		TRUE	TRUE	TRUE													TRUE
Gohir.A01G088100	AT3G26330	CYP71B37	cytochrome P450 family 71 subfamily B polypeptide 37																													TRUE		TRUE	TRUE	TRUE													TRUE
Gohir.A01G088200	AT4G29890		choline monooxygenase putative (CMO-like)		TRUE																											TRUE		TRUE	TRUE	TRUE													TRUE
Gohir.A01G088300	AT5G25180	CYP71B14	cytochrome P450 family 71 subfamily B polypeptide 14	TRUE	TRUE																											TRUE		TRUE	TRUE	TRUE													TRUE
Gohir.A01G088400	AT5G17240	SDG40	SET domain group 40		TRUE																											TRUE		TRUE	TRUE	TRUE													TRUE
Gohir.A01G088500	AT3G26300	CYP71B34	cytochrome P450 family 71 subfamily B polypeptide 34	TRUE	TRUE																											TRUE		TRUE	TRUE	TRUE													TRUE
Gohir.A01G088600	AT5G25120	CYP71B11	ytochrome p450 family 71 subfamily B polypeptide 11	TRUE	TRUE																											TRUE		TRUE	TRUE	TRUE													TRUE
Gohir.A01G088700	AT3G26300	CYP71B34	cytochrome P450 family 71 subfamily B polypeptide 34																													TRUE		TRUE	TRUE	TRUE													TRUE
Gohir.A01G088800	AT5G25180	CYP71B14	cytochrome P450 family 71 subfamily B polypeptide 14	TRUE	TRUE																											TRUE		TRUE	TRUE	TRUE													TRUE
Gohir.A01G088900	AT5G09840		Putative endonuclease or glycosyl hydrolase	TRUE	TRUE																											TRUE		TRUE	TRUE	TRUE													TRUE
Gohir.A01G089000	AT2G18465	none	Chaperone DnaJ-domain superfamily protein		TRUE																											TRUE		TRUE	TRUE	TRUE													TRUE
Gohir.A01G089100	ATCG01250		NADH-Ubiquinone/plastoquinone (complex I) protein																													TRUE		TRUE	TRUE	TRUE													TRUE
Gohir.A01G089200	ATCG01250		NADH-Ubiquinone/plastoquinone (complex I) protein																													TRUE		TRUE	TRUE	TRUE													TRUE
Gohir.A01G089300	ATCG00900		Ribosomal protein S7p/S5e family protein																													TRUE		TRUE	TRUE	TRUE													TRUE
Gohir.A01G089400	ATCG01230		ribosomal protein S12B																													TRUE		TRUE	TRUE	TRUE													TRUE
Gohir.A01G089500																																TRUE		TRUE	TRUE	TRUE													TRUE
Gohir.A01G089600																																TRUE		TRUE	TRUE	TRUE													TRUE
Gohir.A01G089700																																TRUE		TRUE	TRUE	TRUE													TRUE
Gohir.A01G089800	AT4G20235	CYP71A28	cytochrome P450 family 71 subfamily A polypeptide 28																													TRUE		TRUE	TRUE	TRUE													TRUE
Gohir.A01G089900	AT3G13110	ATSERAT2;2,SAT-1,SAT-A,SAT-M,SAT3,SERAT2;2	serine acetyltransferase 2;2	TRUE	TRUE																											TRUE		TRUE	TRUE	TRUE													TRUE
Gohir.A01G090000	AT3G13120		Ribosomal protein S10p/S20e family protein																													TRUE		TRUE	TRUE	TRUE													TRUE
Gohir.A01G090100	AT5G55590	QRT1	Pectin lyase-like superfamily protein																													TRUE		TRUE	TRUE	TRUE													TRUE
Gohir.A01G090200	AT5G55600		agenet domain-containing protein / bromo-adjacent homology (BAH) domain-containing protein																													TRUE		TRUE	TRUE	TRUE													TRUE
Gohir.A01G090300	AT5G55610																															TRUE		TRUE	TRUE	TRUE													TRUE
Gohir.A01G090400	AT1G55910	ZIP11	zinc transporter 11 precursor	TRUE	TRUE																											TRUE		TRUE	TRUE	TRUE													TRUE
Gohir.A01G090500	AT1G55900	emb1860,TIM50	Haloacid dehalogenase-like hydrolase (HAD) superfamily protein	TRUE	TRUE																											TRUE		TRUE	TRUE	TRUE													TRUE
Gohir.A01G090600	AT3G13170	ATSPO11-1	Spo11/DNA topoisomerase VI subunit A protein																													TRUE		TRUE	TRUE	TRUE													TRUE
Gohir.A01G090700	AT5G55630	ATKCO1,ATTPK1,KCO1,TPK1	Outward rectifying potassium channel protein	TRUE	TRUE																											TRUE		TRUE	TRUE	TRUE													TRUE
Gohir.A01G090800	AT5G55630	ATKCO1,ATTPK1,KCO1,TPK1	Outward rectifying potassium channel protein																													TRUE		TRUE	TRUE	TRUE													TRUE
Gohir.A01G090900	AT5G55630	ATKCO1,ATTPK1,KCO1,TPK1	Outward rectifying potassium channel protein	TRUE	TRUE																											TRUE		TRUE	TRUE	TRUE													TRUE
Gohir.A01G091000	AT3G13175																															TRUE		TRUE	TRUE	TRUE													TRUE
Gohir.A01G091100	AT2G04480																															TRUE		TRUE	TRUE	TRUE													TRUE
Gohir.A01G091200	AT4G14540	NF-YB3	nuclear factor Y subunit B3		TRUE																											TRUE		TRUE	TRUE	TRUE													TRUE
Gohir.A01G091300				TRUE	TRUE																											TRUE		TRUE	TRUE	TRUE													TRUE
Gohir.A01G091400	AT5G55730	FLA1	FASCICLIN-like arabinogalactan 1			TRUE																										TRUE		TRUE	TRUE	TRUE													TRUE
Gohir.A01G091500	AT5G58860	CYP86,CYP86A1	cytochrome P450 family 86 subfamily A polypeptide 1	TRUE	TRUE																											TRUE		TRUE	TRUE	TRUE													TRUE
Gohir.A01G091600	AT4G25434	ATNUDT10,NUDT10	nudix hydrolase homolog 10	TRUE	TRUE																											TRUE		TRUE	TRUE	TRUE													TRUE
Gohir.A01G091700	AT5G55820			TRUE	TRUE																											TRUE		TRUE	TRUE	TRUE													TRUE
Gohir.A01G091800	AT5G55830		Concanavalin A-like lectin protein kinase family protein	TRUE	TRUE																											TRUE		TRUE	TRUE	TRUE													TRUE
Gohir.A01G091900	AT1G55870	AHG2,ATPARN	Polynucleotidyl transferase ribonuclease H-like superfamily protein	TRUE	TRUE																											TRUE		TRUE	TRUE	TRUE													TRUE
Gohir.A01G092000	AT3G13180		NOL1/NOP2/sun family protein / antitermination NusB domain-containing protein		TRUE																											TRUE		TRUE	TRUE	TRUE													TRUE
Gohir.A01G092100	AT1G55860	UPL1	ubiquitin-protein ligase 1																													TRUE		TRUE	TRUE	TRUE													TRUE
Gohir.A01G092200	AT5G55840		Pentatricopeptide repeat (PPR) superfamily protein																													TRUE		TRUE	TRUE	TRUE													TRUE
Gohir.A01G092300	AT5G55850	NOI	RPM1-interacting protein 4 (RIN4) family protein																													TRUE		TRUE	TRUE	TRUE													TRUE
Gohir.A01G092400	AT3G07680		emp24/gp25L/p24 family/GOLD family protein																													TRUE		TRUE	TRUE	TRUE													TRUE
Gohir.A01G092500	AT1G55850	ATCSLE1,CSLE1	cellulose synthase like E1																													TRUE		TRUE	TRUE	TRUE													TRUE
Gohir.A01G092600	AT1G55850	ATCSLE1,CSLE1	cellulose synthase like E1																													TRUE		TRUE	TRUE	TRUE													TRUE
Gohir.A01G092700	AT5G55860		Plant protein of unknown function (DUF827)	TRUE	TRUE																											TRUE		TRUE	TRUE	TRUE													TRUE
Gohir.A01G092800	AT4G26620		Sucrase/ferredoxin-like family protein		TRUE																											TRUE		TRUE	TRUE	TRUE													TRUE
Gohir.A01G092900	AT1G55840		Sec14p-like phosphatidylinositol transfer family protein																													TRUE		TRUE	TRUE	TRUE													TRUE
Gohir.A01G093000	AT5G47750	D6PKL2,PK5	D6 protein kinase like 2		TRUE																											TRUE		TRUE	TRUE	TRUE													TRUE
Gohir.A01G093100	AT1G60620	ATRPAC43,RPAC43	RNA polymerase I subunit 43																													TRUE		TRUE	TRUE	TRUE													TRUE
Gohir.A01G093200	AT4G26600		S-adenosyl-L-methionine-dependent methyltransferases superfamily protein	TRUE	TRUE																											TRUE		TRUE	TRUE	TRUE													TRUE
Gohir.A01G093300	AT1G55820		Kinase-related protein of unknown function (DUF1296)	TRUE	TRUE	TRUE																										TRUE		TRUE	TRUE	TRUE													TRUE
Gohir.A01G093400	AT5G55960					TRUE																										TRUE		TRUE	TRUE	TRUE													TRUE
Gohir.A01G093500	AT5G55970		RING/U-box superfamily protein		TRUE																											TRUE		TRUE	TRUE	TRUE													TRUE
Gohir.A01G093600	AT5G47770	FPS1	farnesyl diphosphate synthase 1																													TRUE		TRUE	TRUE	TRUE													TRUE
Gohir.A01G093700	AT5G55980		serine-rich protein-related																													TRUE		TRUE	TRUE	TRUE													TRUE
Gohir.A01G093800	AT4G26570	ATCBL3,CBL3	calcineurin B-like 3		TRUE																											TRUE		TRUE	TRUE	TRUE													TRUE
Gohir.A01G093900	AT5G56000	AtHsp90.4,Hsp81.4	HEAT SHOCK PROTEIN 81.4	TRUE	TRUE																											TRUE		TRUE	TRUE	TRUE													TRUE
Gohir.A01G094000	AT4G26555		FKBP-like peptidyl-prolyl cis-trans isomerase family protein	TRUE	TRUE																											TRUE		TRUE	TRUE	TRUE													TRUE
Gohir.A01G094100	AT4G26550		Got1/Sft2-like vescicle transport protein family	TRUE	TRUE																											TRUE		TRUE	TRUE	TRUE													TRUE
Gohir.A01G094200	AT5G56040		Leucine-rich receptor-like protein kinase family protein	TRUE	TRUE																											TRUE		TRUE	TRUE	TRUE													TRUE
Gohir.A01G094300	AT3G44730	ATKP1,KP1	kinesin-like protein 1	TRUE	TRUE																											TRUE		TRUE	TRUE	TRUE													TRUE
Gohir.A01G094400	AT3G44730	ATKP1,KP1	kinesin-like protein 1	TRUE	TRUE																											TRUE		TRUE	TRUE	TRUE													TRUE
Gohir.A01G094500	AT1G55810	UKL3	uridine kinase-like 3																													TRUE		TRUE	TRUE	TRUE													TRUE
Gohir.A01G094600	AT1G55760		BTB/POZ domain-containing protein		TRUE																											TRUE		TRUE	TRUE	TRUE													TRUE
Gohir.A01G094700	AT1G62390		Octicosapeptide/Phox/Bem1p (PB1) domain-containing protein / tetratricopeptide repeat (TPR)-containing protein	TRUE	TRUE																											TRUE		TRUE	TRUE	TRUE													TRUE
Gohir.A01G094800	AT4G23940		FtsH extracellular protease family		TRUE																											TRUE		TRUE	TRUE	TRUE													TRUE
Gohir.A01G094900	AT1G55730	ATCAX5,CAX5	cation exchanger 5																													TRUE		TRUE	TRUE	TRUE													TRUE
Gohir.A01G095000	AT4G26470		Calcium-binding EF-hand family protein	TRUE	TRUE																											TRUE		TRUE	TRUE	TRUE													TRUE
Gohir.A01G095100	AT3G05660	AtRLP33,RLP33	receptor like protein 33						TRUE																							TRUE		TRUE	TRUE	TRUE													TRUE
Gohir.A01G095200	AT2G04030	AtHsp90.5,CR88,EMB1956,Hsp88.1,HSP90.5	Chaperone protein htpG family protein						TRUE																							TRUE		TRUE	TRUE	TRUE													TRUE
Gohir.A01G095300	AT1G17220	FUG1	Translation initiation factor 2 small GTP-binding protein	TRUE	TRUE				TRUE																							TRUE		TRUE	TRUE	TRUE													TRUE
Gohir.A01G095400	AT5G60900	RLK1	receptor-like protein kinase 1																													TRUE		TRUE	TRUE	TRUE													TRUE
Gohir.A01G095500	AT1G31320	LBD4	LOB domain-containing protein 4						TRUE																							TRUE		TRUE	TRUE	TRUE													TRUE
Gohir.A01G095600	AT3G12890	ASML2	activator of spomin::LUC2						TRUE																							TRUE		TRUE	TRUE	TRUE													TRUE
Gohir.A01G095700	AT1G16520								TRUE																							TRUE		TRUE	TRUE	TRUE													TRUE
Gohir.A01G095800	AT1G56090		Tetratricopeptide repeat (TPR)-like superfamily protein		TRUE				TRUE																							TRUE		TRUE	TRUE	TRUE													TRUE
Gohir.A01G095900	AT2G04240	XERICO	RING/U-box superfamily protein						TRUE																							TRUE		TRUE	TRUE	TRUE													TRUE
Gohir.A01G096000	AT2G04240	XERICO	RING/U-box superfamily protein						TRUE																							TRUE		TRUE	TRUE	TRUE													TRUE
Gohir.A01G096100	AT2G04240	XERICO	RING/U-box superfamily protein						TRUE																							TRUE		TRUE	TRUE	TRUE													TRUE
Gohir.A01G096200	AT2G30070	ATKT1,ATKT1P,ATKUP1,KT1,KUP1	potassium transporter 1	TRUE	TRUE	TRUE			TRUE																							TRUE		TRUE	TRUE	TRUE													TRUE
Gohir.A01G096300	AT3G12870				TRUE																											TRUE		TRUE	TRUE	TRUE													TRUE
Gohir.A01G096400	AT2G04240	XERICO	RING/U-box superfamily protein	TRUE	TRUE																											TRUE		TRUE	TRUE	TRUE													TRUE
Gohir.A01G096500	AT5G45790		Ubiquitin carboxyl-terminal hydrolase family protein	TRUE	TRUE																											TRUE		TRUE	TRUE	TRUE													TRUE
Gohir.A01G096600	AT1G56130		Leucine-rich repeat transmembrane protein kinase	TRUE	TRUE																											TRUE		TRUE	TRUE	TRUE													TRUE
Gohir.A01G096700	AT5G17250		Alkaline-phosphatase-like family protein	TRUE	TRUE																											TRUE		TRUE	TRUE	TRUE													TRUE
Gohir.A01G096800	AT3G12830		SAUR-like auxin-responsive protein family																													TRUE		TRUE	TRUE	TRUE													TRUE
Gohir.A01G096900	AT1G79160																															TRUE		TRUE	TRUE	TRUE	TRUE	TRUE		TRUE	TRUE			TRUE					TRUE
Gohir.A01G097000	AT1G79180	ATMYB63,MYB63	myb domain protein 63																													TRUE		TRUE	TRUE	TRUE	TRUE	TRUE		TRUE	TRUE			TRUE					TRUE
Gohir.A01G097100	AT2G03240		EXS (ERD1/XPR1/SYG1) family protein	TRUE	TRUE	TRUE																										TRUE		TRUE	TRUE	TRUE	TRUE	TRUE		TRUE	TRUE			TRUE					TRUE
Gohir.A01G097200	AT5G08450																															TRUE		TRUE	TRUE	TRUE	TRUE	TRUE		TRUE	TRUE			TRUE					TRUE
Gohir.A01G097300	AT2G34820		basic helix-loop-helix (bHLH) DNA-binding superfamily protein																													TRUE		TRUE	TRUE	TRUE	TRUE	TRUE		TRUE	TRUE			TRUE					TRUE
Gohir.A01G097400	AT1G79550	PGK	phosphoglycerate kinase		TRUE																											TRUE		TRUE	TRUE	TRUE	TRUE	TRUE		TRUE	TRUE			TRUE					TRUE
Gohir.A01G097500	AT3G12780	PGK1	phosphoglycerate kinase 1																													TRUE		TRUE	TRUE	TRUE	TRUE	TRUE		TRUE	TRUE			TRUE					TRUE
Gohir.A01G097600	AT1G28130	GH3.17	Auxin-responsive GH3 family protein	TRUE	TRUE																											TRUE		TRUE	TRUE	TRUE	TRUE	TRUE		TRUE	TRUE			TRUE					TRUE
Gohir.A01G097700																																TRUE		TRUE	TRUE	TRUE	TRUE	TRUE		TRUE	TRUE			TRUE					TRUE
Gohir.A01G097800					TRUE																											TRUE		TRUE	TRUE	TRUE	TRUE	TRUE		TRUE	TRUE			TRUE					TRUE
Gohir.A01G097900																																TRUE		TRUE	TRUE	TRUE	TRUE	TRUE		TRUE	TRUE			TRUE					TRUE
Gohir.A01G098000					TRUE																											TRUE		TRUE	TRUE	TRUE	TRUE	TRUE		TRUE	TRUE			TRUE					TRUE
Gohir.A01G098100	AT1G16310		Cation efflux family protein		TRUE	TRUE																										TRUE		TRUE	TRUE	TRUE	TRUE	TRUE		TRUE	TRUE			TRUE					TRUE
Gohir.A01G098200				TRUE	TRUE																											TRUE		TRUE	TRUE	TRUE	TRUE	TRUE		TRUE	TRUE			TRUE					TRUE
Gohir.A01G098300	AT5G64330	JK218,NPH3,RPT3	Phototropic-responsive NPH3 family protein	TRUE	TRUE																											TRUE		TRUE	TRUE	TRUE	TRUE	TRUE		TRUE	TRUE			TRUE					TRUE
Gohir.A01G098400	AT5G61170		Ribosomal protein S19e family protein																													TRUE		TRUE	TRUE	TRUE	TRUE	TRUE		TRUE	TRUE			TRUE					TRUE
Gohir.A01G098500	AT3G50120		Plant protein of unknown function (DUF247)																													TRUE		TRUE	TRUE	TRUE	TRUE	TRUE		TRUE	TRUE			TRUE					TRUE
Gohir.A01G098600	AT1G16300	GAPCP-2	glyceraldehyde-3-phosphate dehydrogenase of plastid 2		TRUE																											TRUE		TRUE	TRUE	TRUE	TRUE	TRUE		TRUE	TRUE			TRUE					TRUE
Gohir.A01G098700	AT1G06150	EMB1444	basic helix-loop-helix (bHLH) DNA-binding superfamily protein																													TRUE		TRUE	TRUE	TRUE	TRUE	TRUE		TRUE	TRUE			TRUE					TRUE
Gohir.A01G098800	AT1G55790		Domain of unknown function (DUF2431)	TRUE	TRUE	TRUE			TRUE																							TRUE		TRUE	TRUE	TRUE	TRUE	TRUE		TRUE	TRUE			TRUE					TRUE
Gohir.A01G098900	AT1G55790		Domain of unknown function (DUF2431)	TRUE	TRUE	TRUE			TRUE																							TRUE		TRUE	TRUE	TRUE	TRUE	TRUE		TRUE	TRUE			TRUE					TRUE
Gohir.A01G099000	AT5G51510				TRUE				TRUE																							TRUE		TRUE	TRUE	TRUE	TRUE	TRUE		TRUE	TRUE			TRUE					TRUE
Gohir.A01G099100	AT4G00231	MEE50	ARM repeat superfamily protein	TRUE	TRUE				TRUE																							TRUE		TRUE	TRUE	TRUE	TRUE	TRUE		TRUE	TRUE			TRUE					TRUE
Gohir.A01G099200	AT5G17270		Protein prenylyltransferase superfamily protein	TRUE	TRUE	TRUE			TRUE																							TRUE		TRUE	TRUE	TRUE	TRUE	TRUE		TRUE	TRUE			TRUE					TRUE
Gohir.A01G099300	AT3G12340		FKBP-like peptidyl-prolyl cis-trans isomerase family protein			TRUE			TRUE																							TRUE		TRUE	TRUE	TRUE	TRUE	TRUE		TRUE	TRUE			TRUE					TRUE
Gohir.A01G099400									TRUE																							TRUE		TRUE	TRUE	TRUE	TRUE	TRUE		TRUE	TRUE			TRUE					TRUE
Gohir.A01G099500					TRUE				TRUE																							TRUE		TRUE	TRUE	TRUE	TRUE	TRUE		TRUE	TRUE			TRUE					TRUE
Gohir.A01G099600	AT1G16290			TRUE	TRUE				TRUE																							TRUE		TRUE	TRUE	TRUE	TRUE	TRUE		TRUE	TRUE			TRUE					TRUE
Gohir.A01G099700	AT4G00231	MEE50	ARM repeat superfamily protein	TRUE	TRUE																											TRUE		TRUE	TRUE	TRUE	TRUE	TRUE		TRUE	TRUE			TRUE					TRUE
Gohir.A01G099800	AT1G16270		Protein kinase superfamily protein with octicosapeptide/Phox/Bem1p domain						TRUE																							TRUE		TRUE	TRUE	TRUE	TRUE	TRUE		TRUE	TRUE			TRUE					TRUE
Gohir.A01G099900	AT1G50420	SCL-3,SCL3	scarecrow-like 3						TRUE																							TRUE		TRUE	TRUE	TRUE	TRUE	TRUE		TRUE	TRUE			TRUE					TRUE
Gohir.A01G100000	AT1G56170	ATHAP5B,HAP5B,NF-YC2	nuclear factor Y subunit C2		TRUE				TRUE																							TRUE		TRUE	TRUE	TRUE	TRUE	TRUE		TRUE	TRUE			TRUE					TRUE
Gohir.A01G100100	AT1G75950	ASK1,ATSKP1,SKP1,SKP1A,UIP1	S phase kinase-associated protein 1						TRUE																							TRUE		TRUE	TRUE	TRUE	TRUE	TRUE		TRUE	TRUE			TRUE					TRUE
Gohir.A01G100200	AT1G79440	ALDH5F1,SSADH,SSADH1	aldehyde dehydrogenase 5F1	TRUE	TRUE				TRUE																							TRUE		TRUE	TRUE	TRUE	TRUE	TRUE		TRUE	TRUE			TRUE					TRUE
Gohir.A01G100300	AT1G79460	ATKS,ATKS1,GA2,KS,KS1	Terpenoid cyclases/Protein prenyltransferases superfamily protein	TRUE	TRUE				TRUE																							TRUE		TRUE	TRUE	TRUE	TRUE	TRUE		TRUE	TRUE			TRUE					TRUE
Gohir.A01G100400	AT4G24290		MAC/Perforin domain-containing protein						TRUE																							TRUE		TRUE	TRUE	TRUE	TRUE	TRUE		TRUE	TRUE			TRUE					TRUE
Gohir.A01G100500									TRUE																							TRUE		TRUE	TRUE	TRUE	TRUE	TRUE		TRUE	TRUE			TRUE					TRUE
Gohir.A01G100600	AT3G12750	ZIP1	zinc transporter 1 precursor						TRUE																							TRUE		TRUE	TRUE	TRUE	TRUE	TRUE		TRUE	TRUE			TRUE					TRUE
Gohir.A01G100700	AT3G12670	emb2742	CTP synthase family protein		TRUE	TRUE			TRUE																							TRUE		TRUE	TRUE	TRUE	TRUE	TRUE		TRUE	TRUE			TRUE					TRUE
Gohir.A01G100800	AT1G79280	AtTPR,NUA	nuclear pore anchor	TRUE	TRUE				TRUE																							TRUE		TRUE	TRUE	TRUE	TRUE	TRUE		TRUE	TRUE			TRUE					TRUE
Gohir.A01G100900	AT3G03210								TRUE																							TRUE		TRUE	TRUE	TRUE	TRUE	TRUE		TRUE	TRUE			TRUE					TRUE
Gohir.A01G101000	AT3G12710		DNA glycosylase superfamily protein		TRUE				TRUE																							TRUE		TRUE	TRUE	TRUE	TRUE	TRUE		TRUE	TRUE			TRUE					TRUE
Gohir.A01G101100	AT1G66260		RNA-binding (RRM/RBD/RNP motifs) family protein	TRUE	TRUE				TRUE																							TRUE		TRUE	TRUE	TRUE	TRUE	TRUE		TRUE	TRUE			TRUE					TRUE
Gohir.A01G101200	AT1G76660																															TRUE		TRUE	TRUE	TRUE	TRUE	TRUE		TRUE	TRUE			TRUE					TRUE
Gohir.A01G101300	AT5G42390		Insulinase (Peptidase family M16) family protein	TRUE	TRUE																											TRUE		TRUE	TRUE	TRUE	TRUE	TRUE		TRUE	TRUE			TRUE					TRUE
Gohir.A01G101400	AT1G21010																															TRUE		TRUE	TRUE	TRUE	TRUE	TRUE		TRUE	TRUE			TRUE					TRUE
Gohir.A01G101500	AT1G20980	ATSPL14,FBR6,SPL14,SPL1R2	squamosa promoter binding protein-like 14	TRUE	TRUE																											TRUE		TRUE	TRUE	TRUE	TRUE	TRUE		TRUE	TRUE			TRUE					TRUE
Gohir.A01G101600	AT1G20930	CDKB2;2	cyclin-dependent kinase B2;2																													TRUE		TRUE	TRUE	TRUE	TRUE	TRUE		TRUE	TRUE			TRUE					TRUE
Gohir.A01G101700	AT1G76510		ARID/BRIGHT DNA-binding domain-containing protein		TRUE																											TRUE		TRUE	TRUE	TRUE	TRUE	TRUE		TRUE	TRUE			TRUE					TRUE
Gohir.A01G101800	AT1G76460		RNA-binding (RRM/RBD/RNP motifs) family protein																													TRUE		TRUE	TRUE	TRUE	TRUE	TRUE		TRUE	TRUE			TRUE					TRUE
Gohir.A01G101900	AT2G33620		AT hook motif DNA-binding family protein	TRUE	TRUE	TRUE																										TRUE		TRUE	TRUE	TRUE	TRUE	TRUE		TRUE	TRUE			TRUE					TRUE
Gohir.A01G102000	AT2G33630		NAD(P)-binding Rossmann-fold superfamily protein	TRUE	TRUE																											TRUE		TRUE	TRUE	TRUE	TRUE	TRUE		TRUE	TRUE			TRUE					TRUE
Gohir.A01G102100	AT1G20870		HSP20-like chaperones superfamily protein																													TRUE		TRUE	TRUE	TRUE	TRUE	TRUE		TRUE	TRUE			TRUE					TRUE
Gohir.A01G102200	AT1G76420	ANAC031,CUC3,NAC368	NAC (No Apical Meristem) domain transcriptional regulator superfamily protein		TRUE																											TRUE		TRUE	TRUE	TRUE	TRUE	TRUE		TRUE	TRUE			TRUE					TRUE
Gohir.A01G102300					TRUE																											TRUE		TRUE	TRUE	TRUE	TRUE	TRUE		TRUE	TRUE			TRUE					TRUE
Gohir.A01G102400	AT4G35300	TMT2	tonoplast monosaccharide transporter2			TRUE																										TRUE		TRUE	TRUE	TRUE	TRUE	TRUE		TRUE	TRUE			TRUE					TRUE
Gohir.A01G102500	AT1G20823		RING/U-box superfamily protein		TRUE																											TRUE		TRUE	TRUE	TRUE	TRUE	TRUE		TRUE	TRUE			TRUE					TRUE
Gohir.A01G102600	AT1G76400		Ribophorin I																													TRUE		TRUE	TRUE	TRUE	TRUE	TRUE		TRUE	TRUE			TRUE					TRUE
Gohir.A01G102700	AT1G20810		FKBP-like peptidyl-prolyl cis-trans isomerase family protein																													TRUE		TRUE	TRUE	TRUE	TRUE	TRUE		TRUE	TRUE			TRUE					TRUE
Gohir.A01G102800	AT1G11310	ATMLO2,MLO2,PMR2	Seven transmembrane MLO family protein																													TRUE		TRUE	TRUE	TRUE	TRUE	TRUE		TRUE	TRUE			TRUE					TRUE
Gohir.A01G102900	AT1G42960																															TRUE		TRUE	TRUE	TRUE	TRUE	TRUE		TRUE	TRUE			TRUE					TRUE
Gohir.A01G103000	AT1G42970	GAPB	glyceraldehyde-3-phosphate dehydrogenase B subunit																													TRUE		TRUE	TRUE	TRUE	TRUE	TRUE		TRUE	TRUE			TRUE					TRUE
Gohir.A01G103100	AT5G24360	ATIRE1-1,IRE1-1	inositol requiring 1-1	TRUE	TRUE																											TRUE		TRUE	TRUE	TRUE	TRUE	TRUE		TRUE	TRUE			TRUE					TRUE
Gohir.A01G103200	AT5G55180		O-Glycosyl hydrolases family 17 protein																													TRUE		TRUE	TRUE	TRUE	TRUE	TRUE		TRUE	TRUE			TRUE					TRUE
Gohir.A01G103300	AT2G33700		Protein phosphatase 2C family protein		TRUE																											TRUE		TRUE	TRUE	TRUE	TRUE	TRUE		TRUE	TRUE			TRUE					TRUE
Gohir.A01G103400	AT1G42480				TRUE																											TRUE		TRUE	TRUE	TRUE	TRUE	TRUE		TRUE	TRUE			TRUE					TRUE
Gohir.A01G103500	AT5G42350		Galactose oxidase/kelch repeat superfamily protein		TRUE																											TRUE		TRUE	TRUE	TRUE	TRUE	TRUE		TRUE	TRUE			TRUE					TRUE
Gohir.A01G103600	AT1G76390		ARM repeat superfamily protein																													TRUE		TRUE	TRUE	TRUE	TRUE	TRUE		TRUE	TRUE			TRUE					TRUE
Gohir.A01G103700	AT1G20770			TRUE	TRUE																											TRUE		TRUE	TRUE	TRUE	TRUE	TRUE		TRUE	TRUE			TRUE					TRUE
Gohir.A01G103800	AT1G20760		Calcium-binding EF hand family protein	TRUE	TRUE	TRUE																										TRUE		TRUE	TRUE	TRUE	TRUE	TRUE		TRUE	TRUE			TRUE					TRUE
Gohir.A01G103900				TRUE	TRUE																											TRUE		TRUE	TRUE	TRUE	TRUE	TRUE		TRUE	TRUE			TRUE					TRUE
Gohir.A01G104000	AT1G76690	ATOPR2,OPR2	12-oxophytodienoate reductase 2	TRUE	TRUE																											TRUE		TRUE	TRUE	TRUE	TRUE	TRUE		TRUE	TRUE			TRUE					TRUE
Gohir.A01G104100	AT1G20693	HMG BETA 1,HMGB2,NFD02,NFD2	high mobility group B2		TRUE	TRUE																										TRUE		TRUE	TRUE	TRUE	TRUE	TRUE		TRUE	TRUE			TRUE					TRUE
Gohir.A01G104200																																TRUE		TRUE	TRUE	TRUE	TRUE	TRUE		TRUE	TRUE			TRUE					TRUE
Gohir.A01G104300	ATCG00720		photosynthetic electron transfer B																													TRUE		TRUE	TRUE	TRUE	TRUE	TRUE		TRUE	TRUE			TRUE					TRUE
Gohir.A01G104400	AT4G38260		Protein of unknown function (DUF833)		TRUE																											TRUE		TRUE	TRUE	TRUE	TRUE	TRUE		TRUE	TRUE			TRUE					TRUE
Gohir.A01G104500	AT4G38260		Protein of unknown function (DUF833)	TRUE	TRUE																											TRUE		TRUE	TRUE	TRUE	TRUE	TRUE		TRUE	TRUE			TRUE					TRUE
Gohir.A01G104600	AT4G37420		Domain of unknown function (DUF23)																													TRUE		TRUE	TRUE	TRUE	TRUE	TRUE		TRUE	TRUE			TRUE					TRUE
Gohir.A01G104700	AT1G20650		Protein kinase superfamily protein	TRUE	TRUE																											TRUE		TRUE	TRUE	TRUE	TRUE	TRUE		TRUE	TRUE			TRUE					TRUE
Gohir.A01G104800	AT4G38350		Patched family protein	TRUE	TRUE																											TRUE		TRUE	TRUE	TRUE	TRUE	TRUE		TRUE	TRUE			TRUE					TRUE
Gohir.A01G104900	AT1G76350		Plant regulator RWP-RK family protein		TRUE																											TRUE		TRUE	TRUE	TRUE	TRUE	TRUE		TRUE	TRUE			TRUE					TRUE
Gohir.A01G105000	AT4G35090	CAT2	catalase 2																													TRUE		TRUE	TRUE	TRUE	TRUE	TRUE		TRUE	TRUE			TRUE					TRUE
Gohir.A01G105100	AT3G50160		Plant protein of unknown function (DUF247)	TRUE	TRUE	TRUE																										TRUE		TRUE	TRUE	TRUE	TRUE	TRUE		TRUE	TRUE			TRUE					TRUE
Gohir.A01G105200	AT5G42340	PUB15	Plant U-Box 15																													TRUE		TRUE	TRUE	TRUE	TRUE	TRUE		TRUE	TRUE			TRUE					TRUE
Gohir.A01G105300	AT1G76310	CYCB2;4	CYCLIN B2;4	TRUE	TRUE																											TRUE		TRUE	TRUE	TRUE	TRUE	TRUE		TRUE	TRUE			TRUE					TRUE
Gohir.A01G105400	AT1G20580		Small nuclear ribonucleoprotein family protein		TRUE																											TRUE		TRUE	TRUE	TRUE	TRUE	TRUE		TRUE	TRUE			TRUE					TRUE
Gohir.A01G105500	AT1G20575		Nucleotide-diphospho-sugar transferases superfamily protein		TRUE																											TRUE		TRUE	TRUE	TRUE	TRUE	TRUE		TRUE	TRUE			TRUE					TRUE
Gohir.A01G105600	AT5G42320		Zn-dependent exopeptidases superfamily protein																													TRUE		TRUE	TRUE	TRUE	TRUE	TRUE		TRUE	TRUE			TRUE					TRUE
Gohir.A01G105700	AT5G42310		Pentatricopeptide repeat (PPR-like) superfamily protein		TRUE																											TRUE		TRUE	TRUE	TRUE	TRUE	TRUE		TRUE	TRUE			TRUE					TRUE
Gohir.A01G105800	AT1G42440			TRUE	TRUE																											TRUE		TRUE	TRUE	TRUE	TRUE	TRUE		TRUE	TRUE			TRUE					TRUE
Gohir.A01G105900	AT1G42440			TRUE	TRUE																											TRUE		TRUE	TRUE	TRUE	TRUE	TRUE		TRUE	TRUE			TRUE					TRUE
Gohir.A01G106000	AT3G26040		HXXXD-type acyl-transferase family protein	TRUE	TRUE																											TRUE		TRUE	TRUE	TRUE	TRUE	TRUE		TRUE	TRUE			TRUE					TRUE
Gohir.A01G106100	AT3G26040		HXXXD-type acyl-transferase family protein																													TRUE		TRUE	TRUE	TRUE	TRUE	TRUE		TRUE	TRUE			TRUE					TRUE
Gohir.A01G106200	AT1G76280		Tetratricopeptide repeat (TPR)-like superfamily protein																													TRUE		TRUE	TRUE	TRUE	TRUE	TRUE		TRUE	TRUE			TRUE					TRUE
Gohir.A01G106300	AT1G63610			TRUE	TRUE																											TRUE		TRUE	TRUE	TRUE	TRUE	TRUE		TRUE	TRUE			TRUE					TRUE
Gohir.A01G106400	AT1G76270		O-fucosyltransferase family protein																													TRUE		TRUE	TRUE	TRUE	TRUE	TRUE		TRUE	TRUE			TRUE					TRUE
Gohir.A01G106500	AT1G42430				TRUE																											TRUE		TRUE	TRUE	TRUE	TRUE	TRUE		TRUE	TRUE			TRUE					TRUE
Gohir.A01G106600	AT1G76250																															TRUE		TRUE	TRUE	TRUE	TRUE	TRUE		TRUE	TRUE			TRUE					TRUE
Gohir.A01G106700	AT5G42290		transcription activator-related																													TRUE		TRUE	TRUE	TRUE	TRUE	TRUE		TRUE	TRUE			TRUE					TRUE
Gohir.A01G106800				TRUE	TRUE																											TRUE		TRUE	TRUE	TRUE	TRUE	TRUE		TRUE	TRUE			TRUE					TRUE
Gohir.A01G106900	AT1G76240		Arabidopsis protein of unknown function (DUF241)																													TRUE		TRUE	TRUE	TRUE	TRUE	TRUE		TRUE	TRUE			TRUE					TRUE
Gohir.A01G107000	AT4G35240		Protein of unknown function (DUF630 and DUF632)	TRUE	TRUE	TRUE																										TRUE		TRUE	TRUE	TRUE	TRUE	TRUE		TRUE	TRUE			TRUE					TRUE
Gohir.A01G107100	AT5G42270	FTSH5,VAR1	FtsH extracellular protease family																													TRUE		TRUE	TRUE	TRUE	TRUE	TRUE		TRUE	TRUE			TRUE					TRUE
Gohir.A01G107200	AT2G17080		Arabidopsis protein of unknown function (DUF241)																													TRUE		TRUE	TRUE	TRUE	TRUE	TRUE		TRUE	TRUE			TRUE					TRUE
Gohir.A01G107300	AT2G17080		Arabidopsis protein of unknown function (DUF241)	TRUE	TRUE																											TRUE		TRUE	TRUE	TRUE	TRUE	TRUE		TRUE	TRUE			TRUE					TRUE
Gohir.A01G107400	AT4G35190		Putative lysine decarboxylase family protein	TRUE	TRUE																											TRUE		TRUE	TRUE	TRUE	TRUE	TRUE		TRUE	TRUE			TRUE					TRUE
Gohir.A01G107500	AT1G76210		Arabidopsis protein of unknown function (DUF241)																													TRUE		TRUE	TRUE	TRUE	TRUE	TRUE		TRUE	TRUE			TRUE					TRUE
Gohir.A01G107600	AT1G76200				TRUE																											TRUE		TRUE	TRUE	TRUE	TRUE	TRUE		TRUE	TRUE			TRUE					TRUE
Gohir.A01G107700	AT1G20510	OPCL1	OPC-8:0 CoA ligase1	TRUE	TRUE																											TRUE		TRUE	TRUE	TRUE	TRUE	TRUE		TRUE	TRUE			TRUE					TRUE
Gohir.A01G107800	AT1G20450	ERD10,LTI29,LTI45	Dehydrin family protein	TRUE	TRUE	TRUE																										TRUE		TRUE	TRUE	TRUE	TRUE	TRUE		TRUE	TRUE			TRUE					TRUE
Gohir.A01G107900					TRUE																											TRUE		TRUE	TRUE	TRUE	TRUE	TRUE		TRUE	TRUE			TRUE					TRUE
Gohir.A01G108000	AT5G42250		Zinc-binding alcohol dehydrogenase family protein		TRUE																											TRUE		TRUE	TRUE	TRUE	TRUE	TRUE		TRUE	TRUE			TRUE					TRUE
Gohir.A01G108100	AT5G17410		Spc97 / Spc98 family of spindle pole body (SBP) component	TRUE	TRUE																											TRUE		TRUE	TRUE	TRUE	TRUE	TRUE		TRUE	TRUE			TRUE					TRUE
Gohir.A01G108200	AT1G76160	sks5	SKU5 similar 5																													TRUE		TRUE	TRUE	TRUE	TRUE	TRUE		TRUE	TRUE			TRUE					TRUE
Gohir.A01G108300	AT1G76140		Prolyl oligopeptidase family protein																													TRUE		TRUE	TRUE	TRUE	TRUE	TRUE		TRUE	TRUE			TRUE					TRUE
Gohir.A01G108400	AT1G76140		Prolyl oligopeptidase family protein																													TRUE		TRUE	TRUE	TRUE	TRUE	TRUE		TRUE	TRUE			TRUE					TRUE
Gohir.A01G108500	AT2G33680		Tetratricopeptide repeat (TPR)-like superfamily protein																													TRUE		TRUE	TRUE	TRUE	TRUE	TRUE		TRUE	TRUE			TRUE					TRUE
Gohir.A01G108600	AT4G35750		SEC14 cytosolic factor family protein / phosphoglyceride transfer family protein																													TRUE		TRUE	TRUE	TRUE	TRUE	TRUE		TRUE	TRUE			TRUE					TRUE
Gohir.A01G108700	AT5G27280		Zim17-type zinc finger protein																													TRUE		TRUE	TRUE	TRUE	TRUE	TRUE		TRUE	TRUE			TRUE					TRUE
Gohir.A01G108800	AT4G35790	ATPLDDELTA,PLDDELTA	phospholipase D delta	TRUE	TRUE																											TRUE		TRUE	TRUE	TRUE	TRUE	TRUE		TRUE	TRUE			TRUE					TRUE
Gohir.A01G108900	AT2G16990		Major facilitator superfamily protein																													TRUE		TRUE	TRUE	TRUE	TRUE	TRUE		TRUE	TRUE			TRUE					TRUE
Gohir.A01G109000	AT4G38510		ATPase, V1 complex, subunit B protein																													TRUE		TRUE	TRUE	TRUE	TRUE	TRUE		TRUE	TRUE			TRUE					TRUE
Gohir.A01G109100	AT1G60420		DC1 domain-containing protein																													TRUE		TRUE	TRUE	TRUE	TRUE	TRUE		TRUE	TRUE			TRUE					TRUE
Gohir.A01G109200	AT1G07930		GTP binding Elongation factor Tu family protein																													TRUE		TRUE	TRUE	TRUE	TRUE	TRUE		TRUE	TRUE			TRUE					TRUE
Gohir.A01G109300	AT1G76010		Alba DNA/RNA-binding protein																													TRUE		TRUE	TRUE	TRUE	TRUE	TRUE		TRUE	TRUE			TRUE					TRUE
Gohir.A01G109400	AT1G75980		Single hybrid motif superfamily protein	TRUE	TRUE																											TRUE		TRUE	TRUE	TRUE	TRUE	TRUE		TRUE	TRUE			TRUE					TRUE
Gohir.A01G109500	AT1G20180		Protein of unknown function (DUF677)																													TRUE		TRUE	TRUE	TRUE	TRUE	TRUE		TRUE	TRUE			TRUE					TRUE
Gohir.A01G109600	AT4G35890		winged-helix DNA-binding transcription factor family protein		TRUE																											TRUE		TRUE	TRUE	TRUE	TRUE	TRUE		TRUE	TRUE			TRUE					TRUE
Gohir.A01G109700	AT4G35900	atbzip14,FD,FD-1	Basic-leucine zipper (bZIP) transcription factor family protein																													TRUE		TRUE	TRUE	TRUE	TRUE	TRUE		TRUE	TRUE			TRUE					TRUE
Gohir.A01G109800				TRUE	TRUE	TRUE																										TRUE		TRUE	TRUE	TRUE	TRUE	TRUE		TRUE	TRUE			TRUE					TRUE
Gohir.A01G109900				TRUE	TRUE	TRUE																										TRUE		TRUE	TRUE	TRUE	TRUE	TRUE		TRUE	TRUE			TRUE					TRUE
Gohir.A01G110000	AT4G35070		SBP (S-ribonuclease binding protein) family protein	TRUE	TRUE																											TRUE		TRUE	TRUE	TRUE	TRUE	TRUE		TRUE	TRUE			TRUE					TRUE
Gohir.A01G110100	AT1G20100			TRUE	TRUE																											TRUE		TRUE	TRUE	TRUE	TRUE	TRUE		TRUE	TRUE			TRUE					TRUE
Gohir.A01G110200	AT4G35030		Protein kinase superfamily protein	TRUE	TRUE																											TRUE		TRUE	TRUE	TRUE	TRUE	TRUE		TRUE	TRUE			TRUE					TRUE
Gohir.A01G110300	AT1G75850	VPS35B	VPS35 homolog B		TRUE	TRUE																										TRUE		TRUE	TRUE	TRUE	TRUE	TRUE		TRUE	TRUE			TRUE					TRUE
Gohir.A01G110400	AT3G21570			TRUE	TRUE																											TRUE		TRUE	TRUE	TRUE	TRUE	TRUE		TRUE	TRUE			TRUE					TRUE
Gohir.A01G110500	AT4G24190	AtHsp90-7,AtHsp90.7,HSP90.7,SHD	Chaperone protein htpG family protein																													TRUE		TRUE	TRUE	TRUE	TRUE	TRUE		TRUE	TRUE			TRUE					TRUE
Gohir.A01G110600	AT4G38660		Pathogenesis-related thaumatin superfamily protein																													TRUE		TRUE	TRUE	TRUE	TRUE	TRUE		TRUE	TRUE			TRUE					TRUE
Gohir.A01G110700	AT1G20030		Pathogenesis-related thaumatin superfamily protein	TRUE	TRUE	TRUE																										TRUE		TRUE	TRUE	TRUE	TRUE	TRUE		TRUE	TRUE			TRUE					TRUE
Gohir.A01G110800	AT4G24175				TRUE																											TRUE		TRUE	TRUE	TRUE	TRUE	TRUE		TRUE	TRUE			TRUE					TRUE
Gohir.A01G110900	AT2G17880		Chaperone DnaJ-domain superfamily protein		TRUE																											TRUE		TRUE	TRUE	TRUE	TRUE	TRUE		TRUE	TRUE			TRUE					TRUE
Gohir.A01G111000	AT5G42470				TRUE																											TRUE		TRUE	TRUE	TRUE	TRUE	TRUE		TRUE	TRUE			TRUE					TRUE
Gohir.A01G111100	AT1G75780	TUB1	tubulin beta-1 chain	TRUE	TRUE																											TRUE		TRUE	TRUE	TRUE	TRUE	TRUE		TRUE	TRUE			TRUE					TRUE
Gohir.A01G111200	AT4G34860		Plant neutral invertase family protein																													TRUE		TRUE	TRUE	TRUE	TRUE	TRUE		TRUE	TRUE			TRUE					TRUE
Gohir.A01G111300	AT2G47760	ALG3,AtALG3	asparagine-linked glycosylation 3																													TRUE		TRUE	TRUE	TRUE	TRUE	TRUE		TRUE	TRUE			TRUE					TRUE
Gohir.A01G111400	AT1G75710		C2H2-like zinc finger protein																													TRUE		TRUE	TRUE	TRUE	TRUE	TRUE		TRUE	TRUE			TRUE					TRUE
Gohir.A01G111500	AT1G75680	AtGH9B7,GH9B7	glycosyl hydrolase 9B7	TRUE	TRUE																											TRUE		TRUE	TRUE	TRUE	TRUE	TRUE		TRUE	TRUE			TRUE					TRUE
Gohir.A01G111600	AT5G06300		Putative lysine decarboxylase family protein																													TRUE		TRUE	TRUE	TRUE	TRUE	TRUE		TRUE	TRUE			TRUE					TRUE
Gohir.A01G111700	AT1G75580		SAUR-like auxin-responsive protein family																													TRUE		TRUE	TRUE	TRUE	TRUE	TRUE		TRUE	TRUE			TRUE					TRUE
Gohir.A01G111800	AT3G63530	BB,BB2	RING/U-box superfamily protein																													TRUE		TRUE	TRUE	TRUE	TRUE	TRUE		TRUE	TRUE			TRUE					TRUE
Gohir.A01G111900	AT1G19835		Plant protein of unknown function (DUF869)		TRUE																											TRUE		TRUE	TRUE	TRUE	TRUE	TRUE		TRUE	TRUE			TRUE					TRUE
Gohir.A01G112000				TRUE	TRUE																											TRUE		TRUE	TRUE	TRUE	TRUE	TRUE		TRUE	TRUE			TRUE					TRUE
Gohir.A01G112100					TRUE																											TRUE		TRUE	TRUE	TRUE	TRUE	TRUE		TRUE	TRUE			TRUE					TRUE
Gohir.A01G112200	ATCG01070		NADH-ubiquinone/plastoquinone oxidoreductase chain 4L																													TRUE		TRUE	TRUE	TRUE	TRUE	TRUE		TRUE	TRUE			TRUE					TRUE
Gohir.A01G112300	AT1G19850	ARF5,IAA24,MP	Transcriptional factor B3 family protein / auxin-responsive factor AUX/IAA-related	TRUE	TRUE																											TRUE		TRUE	TRUE	TRUE	TRUE	TRUE		TRUE	TRUE			TRUE					TRUE
Gohir.A01G112400	AT3G27230		S-adenosyl-L-methionine-dependent methyltransferases superfamily protein																													TRUE		TRUE	TRUE	TRUE	TRUE	TRUE		TRUE	TRUE			TRUE					TRUE
Gohir.A01G112500	AT5G39590		TLD-domain containing nucleolar protein	TRUE	TRUE																											TRUE		TRUE	TRUE	TRUE	TRUE	TRUE		TRUE	TRUE			TRUE					TRUE
Gohir.A01G112600	AT1G19860		Zinc finger C-x8-C-x5-C-x3-H type family protein	TRUE	TRUE																											TRUE		TRUE	TRUE	TRUE	TRUE	TRUE		TRUE	TRUE			TRUE					TRUE
Gohir.A01G112700	AT1G19870	iqd32	IQ-domain 32		TRUE	TRUE																										TRUE		TRUE	TRUE	TRUE	TRUE	TRUE		TRUE	TRUE			TRUE					TRUE
Gohir.A01G112800	AT5G42520	ATBPC6,BBR/BPC6,BPC6	basic pentacysteine 6																													TRUE		TRUE	TRUE	TRUE	TRUE	TRUE		TRUE	TRUE			TRUE					TRUE
Gohir.A01G112900	AT1G30845																															TRUE		TRUE	TRUE	TRUE	TRUE	TRUE		TRUE	TRUE			TRUE					TRUE
Gohir.A01G113000	AT1G19900		glyoxal oxidase-related protein	TRUE	TRUE																											TRUE		TRUE	TRUE	TRUE	TRUE	TRUE		TRUE	TRUE			TRUE					TRUE
Gohir.A01G113100	AT1G05150		Calcium-binding tetratricopeptide family protein		TRUE	TRUE																										TRUE		TRUE	TRUE	TRUE	TRUE	TRUE		TRUE	TRUE			TRUE					TRUE
Gohir.A01G113200	AT3G54350	emb1967	Forkhead-associated (FHA) domain-containing protein	TRUE	TRUE																											TRUE		TRUE	TRUE	TRUE	TRUE	TRUE		TRUE	TRUE			TRUE					TRUE
Gohir.A01G113300	AT1G62280	SLAH1	SLAC1 homologue 1	TRUE	TRUE																											TRUE		TRUE	TRUE	TRUE	TRUE	TRUE		TRUE	TRUE			TRUE					TRUE
Gohir.A01G113400	AT4G39080	VHA-A3	vacuolar proton ATPase A3	TRUE	TRUE																											TRUE		TRUE	TRUE	TRUE	TRUE	TRUE		TRUE	TRUE			TRUE					TRUE
Gohir.A01G113500	AT1G75510		Transcription initiation factor IIF, beta subunit		TRUE																											TRUE		TRUE	TRUE	TRUE	TRUE	TRUE		TRUE	TRUE			TRUE					TRUE
Gohir.A01G113600	AT1G75500	WAT1	Walls Are Thin 1			TRUE																										TRUE		TRUE	TRUE	TRUE	TRUE	TRUE		TRUE	TRUE			TRUE					TRUE
Gohir.A01G113700	AT1G06060		LisH and RanBPM domains containing protein																													TRUE		TRUE	TRUE	TRUE	TRUE	TRUE		TRUE	TRUE			TRUE					TRUE
Gohir.A01G113800	AT1G19740		ATP-dependent protease La (LON) domain protein																													TRUE		TRUE	TRUE	TRUE	TRUE	TRUE		TRUE	TRUE			TRUE					TRUE
Gohir.A01G113900	AT1G75450	ATCKX5,ATCKX6,CKX5	cytokinin oxidase 5																													TRUE		TRUE	TRUE	TRUE	TRUE	TRUE		TRUE	TRUE			TRUE					TRUE
Gohir.A01G114000	AT5G42990	UBC18	ubiquitin-conjugating enzyme 18			TRUE																										TRUE		TRUE	TRUE	TRUE	TRUE	TRUE		TRUE	TRUE			TRUE					TRUE
Gohir.A01G114100	AT1G75390	AtbZIP44,bZIP44	basic leucine-zipper 44			TRUE																										TRUE		TRUE	TRUE	TRUE	TRUE	TRUE		TRUE	TRUE			TRUE					TRUE
Gohir.A01G114200	AT1G75388	CPuORF5	conserved peptide upstream open reading frame 5																													TRUE		TRUE	TRUE	TRUE	TRUE	TRUE		TRUE	TRUE			TRUE					TRUE
Gohir.A01G114300	AT1G62290		Saposin-like aspartyl protease family protein																													TRUE		TRUE	TRUE	TRUE	TRUE	TRUE		TRUE	TRUE			TRUE					TRUE
Gohir.A01G114400	AT2G35360		ubiquitin family protein																													TRUE		TRUE	TRUE	TRUE	TRUE	TRUE		TRUE	TRUE			TRUE					TRUE
Gohir.A01G114500	AT5G66440				TRUE																											TRUE		TRUE	TRUE	TRUE	TRUE	TRUE		TRUE	TRUE			TRUE					TRUE
Gohir.A01G114600	AT1G47250	PAF2	20S proteasome alpha subunit F2		TRUE																											TRUE		TRUE	TRUE	TRUE	TRUE	TRUE		TRUE	TRUE			TRUE					TRUE
Gohir.A01G114700	AT1G19580	GAMMA CA1	gamma carbonic anhydrase 1																													TRUE		TRUE	TRUE	TRUE	TRUE	TRUE		TRUE	TRUE			TRUE					TRUE
Gohir.A01G114800	AT1G75280		NmrA-like negative transcriptional regulator family protein	TRUE	TRUE	TRUE																										TRUE		TRUE	TRUE	TRUE	TRUE	TRUE		TRUE	TRUE			TRUE					TRUE
Gohir.A01G114900	AT1G19530			TRUE	TRUE																											TRUE		TRUE	TRUE	TRUE	TRUE	TRUE		TRUE	TRUE			TRUE					TRUE
Gohir.A01G115000	AT4G36550		ARM repeat superfamily protein		TRUE																											TRUE		TRUE	TRUE	TRUE	TRUE	TRUE		TRUE	TRUE			TRUE					TRUE
Gohir.A01G115100	AT1G75250	ATRL6,RL6,RSM3	RAD-like 6	TRUE	TRUE																											TRUE		TRUE	TRUE	TRUE	TRUE	TRUE		TRUE	TRUE			TRUE					TRUE
Gohir.A01G115200					TRUE																											TRUE		TRUE	TRUE	TRUE	TRUE	TRUE		TRUE	TRUE			TRUE					TRUE
Gohir.A01G115300	AT1G75240	AtHB33,HB33	homeobox protein 33	TRUE	TRUE																											TRUE		TRUE	TRUE	TRUE	TRUE	TRUE		TRUE	TRUE			TRUE					TRUE
Gohir.A01G115400				TRUE	TRUE																											TRUE		TRUE	TRUE	TRUE	TRUE	TRUE		TRUE	TRUE			TRUE					TRUE
Gohir.A01G115500	AT2G16250		Leucine-rich repeat protein kinase family protein	TRUE	TRUE																											TRUE		TRUE	TRUE	TRUE	TRUE	TRUE		TRUE	TRUE			TRUE					TRUE
Gohir.A01G115600	AT5G15220		Ribosomal protein L27 family protein																													TRUE		TRUE	TRUE	TRUE	TRUE	TRUE		TRUE	TRUE			TRUE					TRUE
Gohir.A01G115700	AT5G42765			TRUE	TRUE																											TRUE		TRUE	TRUE	TRUE	TRUE	TRUE		TRUE	TRUE			TRUE					TRUE
Gohir.A01G115800	AT1G75200		flavodoxin family protein / radical SAM domain-containing protein																													TRUE		TRUE	TRUE	TRUE	TRUE	TRUE		TRUE	TRUE			TRUE					TRUE
Gohir.A01G115900	AT5G47910	ATRBOHD,RBOHD	respiratory burst oxidase homologue D	TRUE	TRUE																											TRUE		TRUE	TRUE	TRUE	TRUE	TRUE		TRUE	TRUE			TRUE					TRUE
Gohir.A01G116000	AT5G42740		Sugar isomerase (SIS) family protein		TRUE																											TRUE		TRUE	TRUE	TRUE	TRUE	TRUE		TRUE	TRUE			TRUE					TRUE
Gohir.A01G116100	AT5G42950		GYF domain-containing protein	TRUE	TRUE																											TRUE		TRUE	TRUE	TRUE	TRUE	TRUE		TRUE	TRUE			TRUE					TRUE
Gohir.A01G116200	AT5G42950		GYF domain-containing protein	TRUE	TRUE																											TRUE		TRUE	TRUE	TRUE	TRUE	TRUE		TRUE	TRUE			TRUE					TRUE
Gohir.A01G116300	AT1G75160		Protein of unknown function (DUF620)		TRUE																											TRUE		TRUE	TRUE	TRUE	TRUE	TRUE		TRUE	TRUE			TRUE					TRUE
Gohir.A01G116400	AT1G75150					TRUE																										TRUE		TRUE	TRUE	TRUE	TRUE	TRUE		TRUE	TRUE			TRUE					TRUE
Gohir.A01G116500	AT5G42970	ATS4,COP14,COP8,CSN4,EMB134,FUS4,FUS8	Proteasome component (PCI) domain protein	TRUE	TRUE																											TRUE		TRUE	TRUE	TRUE	TRUE	TRUE		TRUE	TRUE			TRUE					TRUE
Gohir.A01G116600	AT2G30942		Protein of unknown function (DUF3317)		TRUE																											TRUE		TRUE	TRUE	TRUE	TRUE	TRUE		TRUE	TRUE			TRUE					TRUE
Gohir.A01G116700	AT1G45150			TRUE	TRUE																											TRUE		TRUE	TRUE	TRUE	TRUE	TRUE		TRUE	TRUE			TRUE					TRUE
Gohir.A01G116800	AT1G75130	CYP721A1	cytochrome P450, family 721, subfamily A, polypeptide 1																													TRUE		TRUE	TRUE	TRUE	TRUE	TRUE		TRUE	TRUE			TRUE					TRUE
Gohir.A01G116900	AT4G16580		Protein phosphatase 2C family protein		TRUE																											TRUE		TRUE	TRUE	TRUE	TRUE	TRUE		TRUE	TRUE			TRUE					TRUE
Gohir.A01G117000	AT1G75100	JAC1	J-domain protein required for chloroplast accumulation response 1																													TRUE		TRUE	TRUE	TRUE	TRUE	TRUE		TRUE	TRUE			TRUE					TRUE
Gohir.A01G117100	AT1G47740		PPPDE putative thiol peptidase family protein																													TRUE		TRUE	TRUE	TRUE	TRUE	TRUE		TRUE	TRUE			TRUE					TRUE
Gohir.A01G117200	AT1G80950		Phospholipid/glycerol acyltransferase family protein																													TRUE		TRUE	TRUE	TRUE	TRUE	TRUE		TRUE	TRUE			TRUE					TRUE
Gohir.A01G117300				TRUE	TRUE																											TRUE		TRUE	TRUE	TRUE	TRUE	TRUE		TRUE	TRUE			TRUE					TRUE
Gohir.A01G117400	AT1G19310		RING/U-box superfamily protein		TRUE																											TRUE		TRUE	TRUE	TRUE	TRUE	TRUE		TRUE	TRUE			TRUE					TRUE
Gohir.A01G117500	AT3G50760	GATL2	galacturonosyltransferase-like 2	TRUE	TRUE																											TRUE		TRUE	TRUE	TRUE	TRUE	TRUE		TRUE	TRUE			TRUE					TRUE
Gohir.A01G117600	AT1G19270	DA1	DA1																													TRUE		TRUE	TRUE	TRUE	TRUE	TRUE		TRUE	TRUE			TRUE					TRUE
Gohir.A01G117700	AT1G47530		MATE efflux family protein			TRUE																										TRUE		TRUE	TRUE	TRUE	TRUE	TRUE		TRUE	TRUE			TRUE					TRUE
Gohir.A01G117800	AT4G31940	CYP82C4	cytochrome P450, family 82, subfamily C, polypeptide 4																													TRUE		TRUE	TRUE	TRUE	TRUE	TRUE		TRUE	TRUE			TRUE					TRUE
Gohir.A01G117900	AT4G33280		AP2/B3-like transcriptional factor family protein		TRUE																											TRUE		TRUE	TRUE	TRUE	TRUE	TRUE		TRUE	TRUE			TRUE					TRUE
Gohir.A01G118000	AT2G15880		Leucine-rich repeat (LRR) family protein	TRUE	TRUE																											TRUE		TRUE	TRUE	TRUE	TRUE	TRUE		TRUE	TRUE			TRUE					TRUE
Gohir.A01G118100	AT1G47310																															TRUE		TRUE	TRUE	TRUE	TRUE	TRUE		TRUE	TRUE			TRUE					TRUE
Gohir.A01G118200	AT4G33300	ADR1-L1	ADR1-like 1		TRUE																											TRUE		TRUE	TRUE	TRUE	TRUE	TRUE		TRUE	TRUE			TRUE					TRUE
Gohir.A01G118300	AT5G42680		Protein of unknown function, DUF617																													TRUE		TRUE	TRUE	TRUE	TRUE	TRUE		TRUE	TRUE			TRUE					TRUE
Gohir.A01G118400	AT2G15760		Protein of unknown function (DUF1645)	TRUE	TRUE																											TRUE		TRUE	TRUE	TRUE	TRUE	TRUE		TRUE	TRUE			TRUE					TRUE
Gohir.A01G118500	AT4G34310		alpha/beta-Hydrolases superfamily protein																													TRUE		TRUE	TRUE	TRUE	TRUE	TRUE		TRUE	TRUE			TRUE					TRUE
Gohir.A01G118600					TRUE																											TRUE		TRUE	TRUE	TRUE	TRUE	TRUE		TRUE	TRUE			TRUE					TRUE
Gohir.A01G118700	AT4G33380			TRUE	TRUE																											TRUE		TRUE	TRUE	TRUE	TRUE	TRUE		TRUE	TRUE			TRUE					TRUE
Gohir.A01G118800	AT1G29850		double-stranded DNA-binding family protein																													TRUE		TRUE	TRUE	TRUE	TRUE	TRUE		TRUE	TRUE			TRUE					TRUE
Gohir.A01G118900	AT5G44250		Protein of unknown function DUF829, transmembrane 53																													TRUE		TRUE	TRUE	TRUE	TRUE	TRUE		TRUE	TRUE			TRUE					TRUE
Gohir.A01G119000	AT5G42700		AP2/B3-like transcriptional factor family protein		TRUE																											TRUE		TRUE	TRUE	TRUE	TRUE	TRUE		TRUE	TRUE			TRUE					TRUE
Gohir.A01G119100	AT5G42750	BKI1	BRI1 kinase inhibitor 1																													TRUE		TRUE	TRUE	TRUE	TRUE	TRUE		TRUE	TRUE			TRUE					TRUE
Gohir.A01G119200	AT1G76640		Calcium-binding EF-hand family protein																													TRUE		TRUE	TRUE	TRUE	TRUE	TRUE		TRUE	TRUE			TRUE					TRUE
Gohir.A01G119300	AT4G33350		Tic22-like family protein																													TRUE		TRUE	TRUE	TRUE	TRUE	TRUE		TRUE	TRUE			TRUE					TRUE
Gohir.A01G119400	AT1G45474	LHCA5	photosystem I light harvesting complex gene 5	TRUE	TRUE																											TRUE		TRUE	TRUE	TRUE	TRUE	TRUE		TRUE	TRUE			TRUE					TRUE
Gohir.A01G119500	AT2G26570		Plant protein of unknown function (DUF827)	TRUE	TRUE																											TRUE		TRUE	TRUE	TRUE	TRUE	TRUE		TRUE	TRUE			TRUE					TRUE
Gohir.A01G119600	AT2G04860		Tetratricopeptide repeat (TPR)-like superfamily protein																													TRUE		TRUE	TRUE	TRUE	TRUE	TRUE		TRUE	TRUE			TRUE					TRUE
Gohir.A01G119700	AT4G25000	AMY1,ATAMY1	alpha-amylase-like																													TRUE		TRUE	TRUE	TRUE	TRUE	TRUE		TRUE	TRUE			TRUE					TRUE
Gohir.A01G119800																																TRUE		TRUE	TRUE	TRUE	TRUE	TRUE		TRUE	TRUE			TRUE					TRUE
Gohir.A01G119900	AT5G42890	ATSCP2,SCP2	sterol carrier protein 2			TRUE																										TRUE		TRUE	TRUE	TRUE	TRUE	TRUE		TRUE	TRUE			TRUE					TRUE
Gohir.A01G120000	AT5G42900	COR27	cold regulated gene 27	TRUE	TRUE																											TRUE		TRUE	TRUE	TRUE	TRUE	TRUE		TRUE	TRUE			TRUE					TRUE
Gohir.A01G120100	ATCG01010		NADH-Ubiquinone oxidoreductase (complex I), chain 5 protein																													TRUE		TRUE	TRUE	TRUE	TRUE	TRUE		TRUE	TRUE			TRUE					TRUE
Gohir.A01G120200																																TRUE		TRUE	TRUE	TRUE	TRUE	TRUE		TRUE	TRUE			TRUE					TRUE
Gohir.A01G120300																																TRUE		TRUE	TRUE	TRUE	TRUE	TRUE		TRUE	TRUE			TRUE					TRUE
Gohir.A01G120400																																TRUE		TRUE	TRUE	TRUE	TRUE	TRUE		TRUE	TRUE			TRUE					TRUE
Gohir.A01G120500																																TRUE		TRUE	TRUE	TRUE	TRUE	TRUE		TRUE	TRUE			TRUE					TRUE
Gohir.A01G120600	ATCG00065		ribosomal protein S12A																													TRUE		TRUE	TRUE	TRUE	TRUE	TRUE		TRUE	TRUE			TRUE					TRUE
Gohir.A01G120700																																TRUE		TRUE	TRUE	TRUE	TRUE	TRUE		TRUE	TRUE			TRUE					TRUE
Gohir.A01G120800	ATCG00900		Ribosomal protein S7p/S5e family protein																													TRUE		TRUE	TRUE	TRUE	TRUE	TRUE		TRUE	TRUE			TRUE					TRUE
Gohir.A01G120900	AT1G27730	STZ,ZAT10	salt tolerance zinc finger																													TRUE		TRUE	TRUE	TRUE	TRUE	TRUE		TRUE	TRUE			TRUE					TRUE
Gohir.A01G121000	AT5G43130	TAF4,TAF4B	TBP-associated factor 4	TRUE	TRUE																											TRUE		TRUE	TRUE	TRUE	TRUE	TRUE		TRUE	TRUE			TRUE					TRUE
Gohir.A01G121100	AT3G19540		Protein of unknown function (DUF620)																													TRUE		TRUE	TRUE	TRUE	TRUE	TRUE		TRUE	TRUE			TRUE					TRUE
Gohir.A01G121200	AT5G43100		Eukaryotic aspartyl protease family protein																													TRUE		TRUE	TRUE	TRUE	TRUE	TRUE		TRUE	TRUE			TRUE					TRUE
Gohir.A01G121300	AT3G47570		Leucine-rich repeat protein kinase family protein																													TRUE		TRUE	TRUE	TRUE	TRUE	TRUE		TRUE	TRUE			TRUE					TRUE
Gohir.A01G121400																																TRUE		TRUE	TRUE	TRUE	TRUE	TRUE		TRUE	TRUE			TRUE					TRUE
Gohir.A01G121500	AT1G47200	WPP2	WPP domain protein 2	TRUE	TRUE																											TRUE		TRUE	TRUE	TRUE	TRUE	TRUE		TRUE	TRUE			TRUE					TRUE
Gohir.A01G121600																																TRUE		TRUE	TRUE	TRUE	TRUE	TRUE		TRUE	TRUE			TRUE					TRUE
Gohir.A01G121700	AT5G67260	CYCD3;2	CYCLIN D3;2																													TRUE		TRUE	TRUE	TRUE	TRUE	TRUE		TRUE	TRUE			TRUE					TRUE
Gohir.A01G121800	AT1G47056	VFB1	VIER F-box proteine 1	TRUE	TRUE																											TRUE		TRUE	TRUE	TRUE	TRUE	TRUE		TRUE	TRUE			TRUE					TRUE
Gohir.A01G121900	AT1G47128	RD21,RD21A	Granulin repeat cysteine protease family protein			TRUE																										TRUE		TRUE	TRUE	TRUE	TRUE	TRUE		TRUE	TRUE			TRUE					TRUE
Gohir.A01G122000	AT3G19320		Leucine-rich repeat (LRR) family protein	TRUE	TRUE																											TRUE		TRUE	TRUE	TRUE	TRUE	TRUE		TRUE	TRUE			TRUE					TRUE
Gohir.A01G122100	AT4G06744		Leucine-rich repeat (LRR) family protein	TRUE	TRUE																											TRUE		TRUE	TRUE	TRUE	TRUE	TRUE		TRUE	TRUE			TRUE					TRUE
Gohir.A01G122200	AT5G43020		Leucine-rich repeat protein kinase family protein	TRUE	TRUE																											TRUE		TRUE	TRUE	TRUE	TRUE	TRUE		TRUE	TRUE			TRUE					TRUE
Gohir.A01G122300	AT5G47820	FRA1	P-loop containing nucleoside triphosphate hydrolases superfamily protein	TRUE	TRUE	TRUE																										TRUE		TRUE	TRUE	TRUE	TRUE	TRUE		TRUE	TRUE			TRUE					TRUE
Gohir.A01G122400	AT1G46768	RAP2.1	related to AP2 1				TRUE																									TRUE		TRUE	TRUE	TRUE	TRUE	TRUE		TRUE	TRUE			TRUE					TRUE
Gohir.A01G122500	AT1G46480	WOX4	WUSCHEL related homeobox 4																													TRUE		TRUE	TRUE	TRUE	TRUE	TRUE		TRUE	TRUE			TRUE					TRUE
Gohir.A01G122600	AT4G34110	ATPAB2,PAB2,PABP2	poly(A) binding protein 2		TRUE																											TRUE		TRUE	TRUE	TRUE	TRUE	TRUE		TRUE	TRUE			TRUE					TRUE
Gohir.A01G122700	AT1G46264	AT-HSFB4,HSFB4,SCZ	heat shock transcription factor B4				TRUE																									TRUE		TRUE	TRUE	TRUE	TRUE	TRUE		TRUE	TRUE			TRUE					TRUE
Gohir.A01G122800	AT1G34060		Pyridoxal phosphate (PLP)-dependent transferases superfamily protein		TRUE																											TRUE		TRUE	TRUE	TRUE	TRUE	TRUE		TRUE	TRUE			TRUE					TRUE
Gohir.A01G122900	AT1G27752		Ubiquitin system component Cue protein	TRUE	TRUE																											TRUE		TRUE	TRUE	TRUE	TRUE	TRUE		TRUE	TRUE			TRUE					TRUE
Gohir.A01G123000	AT3G58470		nucleic acid binding;methyltransferases																													TRUE		TRUE	TRUE	TRUE	TRUE	TRUE		TRUE	TRUE			TRUE					TRUE
Gohir.A01G123100	AT3G14470		NB-ARC domain-containing disease resistance protein		TRUE																											TRUE		TRUE	TRUE	TRUE	TRUE	TRUE		TRUE	TRUE			TRUE					TRUE
Gohir.A01G123200	AT5G63905																															TRUE		TRUE	TRUE	TRUE	TRUE	TRUE		TRUE	TRUE			TRUE					TRUE
Gohir.A01G123300	AT1G10140		Uncharacterised conserved protein UCP031279																													TRUE		TRUE	TRUE	TRUE	TRUE	TRUE		TRUE	TRUE			TRUE					TRUE
Gohir.A01G123400	AT1G10150		Carbohydrate-binding protein	TRUE	TRUE																											TRUE		TRUE	TRUE	TRUE	TRUE	TRUE		TRUE	TRUE			TRUE					TRUE
Gohir.A01G123500				TRUE	TRUE																											TRUE		TRUE	TRUE	TRUE	TRUE	TRUE		TRUE	TRUE			TRUE					TRUE
Gohir.A01G123600				TRUE	TRUE																											TRUE		TRUE	TRUE	TRUE	TRUE	TRUE		TRUE	TRUE			TRUE					TRUE
Gohir.A01G123700				TRUE	TRUE																											TRUE		TRUE	TRUE	TRUE	TRUE	TRUE		TRUE	TRUE			TRUE					TRUE
Gohir.A01G123800	AT5G20600																															TRUE		TRUE	TRUE	TRUE	TRUE	TRUE		TRUE	TRUE			TRUE					TRUE
Gohir.A01G123900	AT1G65590	ATHEX1,HEXO3	beta-hexosaminidase 3																													TRUE		TRUE	TRUE	TRUE	TRUE	TRUE		TRUE	TRUE			TRUE					TRUE
Gohir.A01G124000	AT2G35040		AICARFT/IMPCHase bienzyme family protein	TRUE	TRUE																											TRUE		TRUE	TRUE	TRUE	TRUE	TRUE		TRUE	TRUE			TRUE					TRUE
Gohir.A01G124100	AT1G58440	SQE1,XF1	FAD/NAD(P)-binding oxidoreductase family protein																													TRUE		TRUE	TRUE	TRUE	TRUE	TRUE		TRUE	TRUE			TRUE					TRUE
Gohir.A01G124200	AT4G38200		SEC7-like guanine nucleotide exchange family protein																													TRUE		TRUE	TRUE	TRUE	TRUE	TRUE		TRUE	TRUE			TRUE					TRUE
Gohir.A01G124300	AT4G37770	ACS8	1-amino-cyclopropane-1-carboxylate synthase 8	TRUE	TRUE																											TRUE		TRUE	TRUE	TRUE	TRUE	TRUE		TRUE	TRUE			TRUE					TRUE
Gohir.A01G124400	AT1G58520	RXW8	lipases;hydrolases, acting on ester bonds	TRUE	TRUE																											TRUE		TRUE	TRUE	TRUE	TRUE	TRUE		TRUE	TRUE			TRUE					TRUE
Gohir.A01G124500	AT1G49510	emb1273	embryo defective 1273		TRUE																											TRUE		TRUE	TRUE	TRUE	TRUE	TRUE		TRUE	TRUE			TRUE					TRUE
Gohir.A01G124600	AT1G28410				TRUE																											TRUE		TRUE	TRUE	TRUE	TRUE	TRUE		TRUE	TRUE			TRUE					TRUE
Gohir.A01G124700																																TRUE		TRUE	TRUE	TRUE	TRUE	TRUE		TRUE	TRUE			TRUE					TRUE
Gohir.A01G124800	AT1G05070		Protein of unknown function (DUF1068)																													TRUE		TRUE	TRUE	TRUE	TRUE	TRUE		TRUE	TRUE			TRUE					TRUE
Gohir.A01G124900	AT4G37790	HAT22	Homeobox-leucine zipper protein family	TRUE	TRUE																											TRUE		TRUE	TRUE	TRUE	TRUE	TRUE		TRUE	TRUE			TRUE					TRUE
Gohir.A01G125000	AT5G49630	AAP6	amino acid permease 6																													TRUE		TRUE	TRUE	TRUE	TRUE	TRUE		TRUE	TRUE			TRUE					TRUE
Gohir.A01G125100	AT1G09980		Putative serine esterase family protein																													TRUE		TRUE	TRUE	TRUE	TRUE	TRUE		TRUE	TRUE			TRUE					TRUE
Gohir.A01G125200	AT1G27600	I9H,IRX9-L	Nucleotide-diphospho-sugar transferases superfamily protein		TRUE																											TRUE		TRUE	TRUE	TRUE	TRUE	TRUE		TRUE	TRUE			TRUE					TRUE
Gohir.A01G125300	AT1G27595			TRUE	TRUE																											TRUE		TRUE	TRUE	TRUE	TRUE	TRUE		TRUE	TRUE			TRUE					TRUE
Gohir.A01G125400	AT1G58290	HEMA1	Glutamyl-tRNA reductase family protein																													TRUE		TRUE	TRUE	TRUE	TRUE	TRUE		TRUE	TRUE			TRUE					TRUE
Gohir.A01G125500	AT5G65640	bHLH093	beta HLH protein 93																													TRUE		TRUE	TRUE	TRUE	TRUE	TRUE		TRUE	TRUE			TRUE					TRUE
Gohir.A01G125600	AT4G29430	rps15ae	ribosomal protein S15A E																													TRUE		TRUE	TRUE	TRUE	TRUE	TRUE		TRUE	TRUE			TRUE					TRUE
Gohir.A01G125700	AT5G64460		Phosphoglycerate mutase family protein																													TRUE		TRUE	TRUE	TRUE	TRUE	TRUE		TRUE	TRUE			TRUE					TRUE
Gohir.A01G125800	AT1G09920		TRAF-type zinc finger-related																													TRUE		TRUE	TRUE	TRUE	TRUE	TRUE		TRUE	TRUE			TRUE					TRUE
Gohir.A01G125900	AT1G09890		Rhamnogalacturonate lyase family protein																													TRUE		TRUE	TRUE	TRUE	TRUE	TRUE		TRUE	TRUE			TRUE					TRUE
Gohir.A01G126000	AT3G21175	GATA24,TIFY2B,ZML1	ZIM-like 1		TRUE																											TRUE		TRUE	TRUE	TRUE	TRUE	TRUE		TRUE	TRUE			TRUE					TRUE
Gohir.A01G126100	AT3G23830	GR-RBP4,GRP4	glycine-rich RNA-binding protein 4																													TRUE		TRUE	TRUE	TRUE	TRUE	TRUE		TRUE	TRUE			TRUE					TRUE
Gohir.A01G126200	AT4G24510	CER2,VC-2,VC2	HXXXD-type acyl-transferase family protein	TRUE	TRUE	TRUE																										TRUE		TRUE	TRUE	TRUE	TRUE	TRUE		TRUE	TRUE			TRUE					TRUE
Gohir.A01G126300	AT4G24520	AR1,ATR1	P450 reductase 1																													TRUE		TRUE	TRUE	TRUE	TRUE	TRUE		TRUE	TRUE			TRUE					TRUE
Gohir.A01G126400	AT1G21270	WAK2	wall-associated kinase 2																													TRUE		TRUE	TRUE	TRUE	TRUE	TRUE		TRUE	TRUE			TRUE					TRUE
Gohir.A01G126500	AT1G09710		Homeodomain-like superfamily protein		TRUE																											TRUE		TRUE	TRUE	TRUE	TRUE	TRUE		TRUE	TRUE			TRUE					TRUE
Gohir.A01G126600	AT4G38060																															TRUE		TRUE	TRUE	TRUE	TRUE	TRUE		TRUE	TRUE			TRUE					TRUE
Gohir.A01G126700	AT2G07727		Di-haem cytochrome, transmembrane;Cytochrome b/b6, C-terminal																													TRUE		TRUE	TRUE	TRUE	TRUE	TRUE		TRUE	TRUE			TRUE					TRUE
Gohir.A01G126800	AT2G34520	RPS14	mitochondrial ribosomal protein S14																													TRUE		TRUE	TRUE	TRUE	TRUE	TRUE		TRUE	TRUE			TRUE					TRUE
Gohir.A01G126900	AT5G10920		L-Aspartase-like family protein																													TRUE		TRUE	TRUE	TRUE	TRUE	TRUE		TRUE	TRUE			TRUE					TRUE
Gohir.A01G127000	AT1G22310	ATMBD8,MBD8	methyl-CPG-binding domain 8																													TRUE		TRUE	TRUE	TRUE	TRUE	TRUE		TRUE	TRUE			TRUE					TRUE
Gohir.A01G127100	AT1G34780	APRL4,ATAPRL4	APR-like 4	TRUE	TRUE																											TRUE		TRUE	TRUE	TRUE	TRUE	TRUE		TRUE	TRUE			TRUE					TRUE
Gohir.A01G127200	AT1G34770																															TRUE		TRUE	TRUE	TRUE	TRUE	TRUE		TRUE	TRUE			TRUE					TRUE
Gohir.A01G127300	AT1G35780			TRUE	TRUE																											TRUE		TRUE	TRUE	TRUE	TRUE	TRUE		TRUE	TRUE			TRUE					TRUE
Gohir.A01G127400	AT2G01260		Protein of unknown function (DUF789)	TRUE	TRUE																											TRUE		TRUE	TRUE	TRUE	TRUE	TRUE		TRUE	TRUE			TRUE					TRUE
Gohir.A01G127500	AT2G01260		Protein of unknown function (DUF789)	TRUE	TRUE																											TRUE		TRUE	TRUE	TRUE	TRUE	TRUE		TRUE	TRUE			TRUE					TRUE
Gohir.A01G127600	AT5G20000		AAA-type ATPase family protein																													TRUE		TRUE	TRUE	TRUE	TRUE	TRUE		TRUE	TRUE			TRUE					TRUE
Gohir.A01G127700	AT1G30950	UFO	F-box family protein																													TRUE		TRUE	TRUE	TRUE	TRUE	TRUE		TRUE	TRUE			TRUE					TRUE
Gohir.A01G127800	AT5G27620	CYCH;1	cyclin H;1																													TRUE		TRUE	TRUE	TRUE	TRUE	TRUE		TRUE	TRUE			TRUE					TRUE
Gohir.A01G127900	AT1G35830		VQ motif-containing protein	TRUE	TRUE																											TRUE		TRUE	TRUE	TRUE	TRUE	TRUE		TRUE	TRUE			TRUE					TRUE
Gohir.A01G128000	AT4G09040		RNA-binding (RRM/RBD/RNP motifs) family protein			TRUE																										TRUE		TRUE	TRUE	TRUE	TRUE	TRUE		TRUE	TRUE			TRUE					TRUE
Gohir.A01G128100	AT2G01710		Chaperone DnaJ-domain superfamily protein																													TRUE		TRUE	TRUE	TRUE	TRUE	TRUE		TRUE	TRUE			TRUE					TRUE
Gohir.A01G128200	AT2G34670		Protein of unknown function (DUF630 and DUF632)		TRUE																											TRUE		TRUE	TRUE	TRUE	TRUE	TRUE		TRUE	TRUE			TRUE					TRUE
Gohir.A01G128300	AT4G21070	ATBRCA1,BRCA1	breast cancer susceptibility1	TRUE	TRUE																											TRUE		TRUE	TRUE	TRUE	TRUE	TRUE		TRUE	TRUE			TRUE					TRUE
Gohir.A01G128400					TRUE	TRUE																										TRUE		TRUE	TRUE	TRUE	TRUE	TRUE		TRUE	TRUE			TRUE					TRUE
Gohir.A01G128500	AT5G13150	ATEXO70C1,EXO70C1	exocyst subunit exo70 family protein C1	TRUE	TRUE																											TRUE		TRUE	TRUE	TRUE	TRUE	TRUE		TRUE	TRUE			TRUE					TRUE
Gohir.A01G128600	AT1G21270	WAK2	wall-associated kinase 2																													TRUE		TRUE	TRUE	TRUE	TRUE	TRUE		TRUE	TRUE			TRUE					TRUE
Gohir.A01G128700	AT4G24580	REN1	Rho GTPase activation protein (RhoGAP) with PH domain	TRUE	TRUE																											TRUE		TRUE	TRUE	TRUE	TRUE	TRUE		TRUE	TRUE			TRUE					TRUE
Gohir.A01G128800	AT5G02420																															TRUE		TRUE	TRUE	TRUE	TRUE	TRUE		TRUE	TRUE			TRUE					TRUE
Gohir.A01G128900	AT3G52170		DNA binding	TRUE	TRUE																											TRUE		TRUE	TRUE	TRUE	TRUE	TRUE		TRUE	TRUE			TRUE					TRUE
Gohir.A01G129000	AT3G52190	PHF1	phosphate transporter traffic facilitator1																													TRUE		TRUE	TRUE	TRUE	TRUE	TRUE		TRUE	TRUE			TRUE					TRUE
Gohir.A01G129100	AT5G04510	ATPDK1,PDK1	3\'-phosphoinositide-dependent protein kinase 1	TRUE	TRUE																											TRUE		TRUE	TRUE	TRUE	TRUE	TRUE		TRUE	TRUE			TRUE					TRUE
Gohir.A01G129200	AT3G10550		Myotubularin-like phosphatases II superfamily		TRUE																											TRUE		TRUE	TRUE	TRUE	TRUE	TRUE		TRUE	TRUE			TRUE					TRUE
Gohir.A01G129300	AT5G04550		Protein of unknown function (DUF668)		TRUE																											TRUE		TRUE	TRUE	TRUE	TRUE	TRUE		TRUE	TRUE			TRUE					TRUE
Gohir.A01G129400	AT5G04460		RING/U-box superfamily protein																													TRUE		TRUE	TRUE	TRUE	TRUE	TRUE		TRUE	TRUE			TRUE					TRUE
Gohir.A01G129500	AT3G10520	AHB2,ARATH GLB2,ATGLB2,GLB2,HB2,NSHB2	haemoglobin 2																													TRUE		TRUE	TRUE	TRUE	TRUE	TRUE		TRUE	TRUE			TRUE					TRUE
Gohir.A01G129600				TRUE	TRUE																											TRUE		TRUE	TRUE	TRUE	TRUE	TRUE		TRUE	TRUE			TRUE					TRUE
Gohir.A01G129700	AT5G04560	DME	HhH-GPD base excision DNA repair family protein	TRUE	TRUE	TRUE																										TRUE		TRUE	TRUE	TRUE	TRUE	TRUE		TRUE	TRUE			TRUE					TRUE
Gohir.A01G129800	AT1G66240	ATATX1,ATX1	homolog of anti-oxidant 1																													TRUE		TRUE	TRUE	TRUE	TRUE	TRUE		TRUE	TRUE			TRUE					TRUE
Gohir.A01G129900	AT5G22510	At-A/N-InvE,INV-E	alkaline/neutral invertase			TRUE																										TRUE		TRUE	TRUE	TRUE	TRUE	TRUE		TRUE	TRUE			TRUE					TRUE
Gohir.A01G130000	AT5G22510	At-A/N-InvE,INV-E	alkaline/neutral invertase			TRUE																										TRUE		TRUE	TRUE	TRUE	TRUE	TRUE		TRUE	TRUE			TRUE					TRUE
Gohir.A01G130100	AT5G22510	At-A/N-InvE,INV-E	alkaline/neutral invertase	TRUE	TRUE	TRUE																										TRUE		TRUE	TRUE	TRUE	TRUE	TRUE		TRUE	TRUE			TRUE					TRUE
Gohir.A01G130200	AT3G56240	CCH	copper chaperone																													TRUE		TRUE	TRUE	TRUE	TRUE	TRUE		TRUE	TRUE			TRUE					TRUE
Gohir.A01G130300	AT5G04670		Enhancer of polycomb-like transcription factor protein		TRUE																											TRUE		TRUE	TRUE	TRUE	TRUE	TRUE		TRUE	TRUE			TRUE					TRUE
Gohir.A01G130400	AT5G59850		Ribosomal protein S8 family protein		TRUE																											TRUE		TRUE	TRUE	TRUE	TRUE	TRUE		TRUE	TRUE			TRUE					TRUE
Gohir.A01G130500	AT5G65550		UDP-Glycosyltransferase superfamily protein																													TRUE		TRUE	TRUE	TRUE	TRUE	TRUE		TRUE	TRUE			TRUE					TRUE
Gohir.A01G130600																																TRUE		TRUE	TRUE	TRUE	TRUE	TRUE		TRUE	TRUE			TRUE					TRUE
Gohir.A01G130700	AT3G10290		Nucleotide-sugar transporter family protein		TRUE																											TRUE		TRUE	TRUE	TRUE	TRUE	TRUE		TRUE	TRUE			TRUE					TRUE
Gohir.A01G130800	AT3G10330		Cyclin-like family protein																													TRUE		TRUE	TRUE	TRUE	TRUE	TRUE		TRUE	TRUE			TRUE					TRUE
Gohir.A01G130900	AT4G02570	ATCUL1,AXR6,CUL1	cullin 1																													TRUE		TRUE	TRUE	TRUE	TRUE	TRUE		TRUE	TRUE			TRUE					TRUE
Gohir.A01G131000	AT3G57400																															TRUE		TRUE	TRUE	TRUE	TRUE	TRUE		TRUE	TRUE			TRUE					TRUE
Gohir.A01G131100	AT3G63530	BB,BB2	RING/U-box superfamily protein																													TRUE		TRUE	TRUE	TRUE	TRUE	TRUE		TRUE	TRUE			TRUE					TRUE
Gohir.A01G131200	AT2G41740	ATVLN2,VLN2	villin 2																													TRUE		TRUE	TRUE	TRUE	TRUE	TRUE		TRUE	TRUE			TRUE					TRUE
Gohir.A01G131300																																TRUE		TRUE	TRUE	TRUE	TRUE	TRUE		TRUE	TRUE			TRUE					TRUE
Gohir.A01G131400	AT2G41790		Insulinase (Peptidase family M16) family protein	TRUE	TRUE	TRUE																										TRUE		TRUE	TRUE	TRUE	TRUE	TRUE		TRUE	TRUE			TRUE					TRUE
Gohir.A01G131500	AT2G41790		Insulinase (Peptidase family M16) family protein	TRUE	TRUE																											TRUE		TRUE	TRUE	TRUE	TRUE	TRUE		TRUE	TRUE			TRUE					TRUE
Gohir.A01G131600	AT2G41790		Insulinase (Peptidase family M16) family protein																													TRUE		TRUE	TRUE	TRUE	TRUE	TRUE		TRUE	TRUE			TRUE					TRUE
Gohir.A01G131700					TRUE																											TRUE		TRUE	TRUE	TRUE	TRUE	TRUE		TRUE	TRUE			TRUE					TRUE
Gohir.A01G131800				TRUE	TRUE																											TRUE		TRUE	TRUE	TRUE	TRUE	TRUE		TRUE	TRUE			TRUE					TRUE
Gohir.A01G131900	AT4G05320	UBQ10	polyubiquitin 10																													TRUE		TRUE	TRUE	TRUE	TRUE	TRUE		TRUE	TRUE			TRUE					TRUE
Gohir.A01G132000	AT3G57520	AtSIP2,SIP2	seed imbibition 2	TRUE	TRUE																											TRUE		TRUE	TRUE	TRUE	TRUE	TRUE		TRUE	TRUE			TRUE					TRUE
Gohir.A01G132100	AT2G22540	AGL22,SVP	K-box region and MADS-box transcription factor family protein		TRUE																											TRUE		TRUE	TRUE	TRUE	TRUE	TRUE		TRUE	TRUE			TRUE					TRUE
Gohir.A01G132200	AT4G24540	AGL24	AGAMOUS-like 24		TRUE																											TRUE		TRUE	TRUE	TRUE	TRUE	TRUE		TRUE	TRUE			TRUE					TRUE
Gohir.A01G132300	AT1G78280		transferases, transferring glycosyl groups	TRUE	TRUE																											TRUE		TRUE	TRUE	TRUE	TRUE	TRUE		TRUE	TRUE			TRUE					TRUE
Gohir.A01G132400	AT1G09730		Cysteine proteinases superfamily protein																													TRUE		TRUE	TRUE	TRUE	TRUE	TRUE		TRUE	TRUE			TRUE					TRUE
Gohir.A01G132500	AT1G78300	14-3-3OMEGA,GF14 OMEGA,GRF2	general regulatory factor 2		TRUE																											TRUE		TRUE	TRUE	TRUE	TRUE	TRUE		TRUE	TRUE			TRUE					TRUE
Gohir.A01G132600	AT1G22470				TRUE																											TRUE		TRUE	TRUE	TRUE	TRUE	TRUE		TRUE	TRUE			TRUE					TRUE
Gohir.A01G132700				TRUE	TRUE																											TRUE		TRUE	TRUE	TRUE	TRUE	TRUE		TRUE	TRUE			TRUE					TRUE
Gohir.A01G132800	AT4G30770		Putative membrane lipoprotein																													TRUE		TRUE	TRUE	TRUE	TRUE	TRUE		TRUE	TRUE			TRUE					TRUE
Gohir.A01G132900	AT1G11572		Plant thionin family protein																													TRUE		TRUE	TRUE	TRUE	TRUE	TRUE		TRUE	TRUE			TRUE					TRUE
Gohir.A01G133000	AT5G12480	CPK7	calmodulin-domain protein kinase 7	TRUE	TRUE																											TRUE		TRUE	TRUE	TRUE	TRUE	TRUE		TRUE	TRUE			TRUE					TRUE
Gohir.A01G133100	AT1G65660	SMP1	Pre-mRNA splicing Prp18-interacting factor	TRUE	TRUE																											TRUE		TRUE	TRUE	TRUE	TRUE	TRUE		TRUE	TRUE			TRUE					TRUE
Gohir.A01G133200	AT5G51960																															TRUE		TRUE	TRUE	TRUE	TRUE	TRUE		TRUE	TRUE			TRUE					TRUE
Gohir.A01G133300	AT3G52300	ATPQ	ATP synthase D chain, mitochondrial		TRUE																											TRUE		TRUE	TRUE	TRUE	TRUE	TRUE		TRUE	TRUE			TRUE					TRUE
Gohir.A01G133400	AT2G35800		mitochondrial substrate carrier family protein																													TRUE		TRUE	TRUE	TRUE	TRUE	TRUE		TRUE	TRUE			TRUE					TRUE
Gohir.A01G133500	AT2G26430	ATRCY1,RCY1	arginine-rich cyclin 1	TRUE	TRUE																											TRUE		TRUE	TRUE	TRUE	TRUE	TRUE		TRUE	TRUE			TRUE					TRUE
Gohir.A01G133600	AT3G03300	ATDCL2,DCL2	dicer-like 2	TRUE	TRUE																											TRUE		TRUE	TRUE	TRUE	TRUE	TRUE		TRUE	TRUE			TRUE					TRUE
Gohir.A01G133700																																TRUE		TRUE	TRUE	TRUE	TRUE	TRUE		TRUE	TRUE			TRUE					TRUE
Gohir.A01G133800	AT1G10430	PP2A-2	protein phosphatase 2A-2		TRUE																											TRUE		TRUE	TRUE	TRUE	TRUE	TRUE		TRUE	TRUE			TRUE					TRUE
Gohir.A01G133900	AT2G33680		Tetratricopeptide repeat (TPR)-like superfamily protein	TRUE	TRUE																											TRUE		TRUE	TRUE	TRUE	TRUE	TRUE		TRUE	TRUE			TRUE					TRUE
Gohir.A01G134000	AT5G12840	ATHAP2A,EMB2220,HAP2A,NF-YA1	nuclear factor Y, subunit A1	TRUE	TRUE		TRUE																									TRUE		TRUE	TRUE	TRUE	TRUE	TRUE		TRUE	TRUE			TRUE					TRUE
Gohir.A01G134100	AT2G41900		CCCH-type zinc finger protein with ARM repeat domain																													TRUE		TRUE	TRUE	TRUE	TRUE	TRUE		TRUE	TRUE			TRUE					TRUE
Gohir.A01G134200	AT3G57650	LPAT2	lysophosphatidyl acyltransferase 2																													TRUE		TRUE	TRUE	TRUE	TRUE	TRUE		TRUE	TRUE			TRUE					TRUE
Gohir.A01G134300	AT3G57670	NTT,WIP2	C2H2-type zinc finger family protein	TRUE	TRUE																											TRUE		TRUE	TRUE	TRUE	TRUE	TRUE		TRUE	TRUE			TRUE					TRUE
Gohir.A01G134400																																TRUE		TRUE	TRUE	TRUE	TRUE	TRUE		TRUE	TRUE			TRUE					TRUE
Gohir.A01G134500					TRUE	TRUE																										TRUE		TRUE	TRUE	TRUE	TRUE	TRUE		TRUE	TRUE			TRUE					TRUE
Gohir.A01G134600																																TRUE		TRUE	TRUE	TRUE	TRUE	TRUE		TRUE	TRUE			TRUE					TRUE
Gohir.A01G134700				TRUE	TRUE																											TRUE		TRUE	TRUE	TRUE	TRUE	TRUE		TRUE	TRUE			TRUE					TRUE
Gohir.A01G134800																																TRUE		TRUE	TRUE	TRUE	TRUE	TRUE		TRUE	TRUE			TRUE					TRUE
Gohir.A01G134900					TRUE																											TRUE		TRUE	TRUE	TRUE	TRUE	TRUE		TRUE	TRUE			TRUE					TRUE
Gohir.A01G135000	AT2G41905																															TRUE		TRUE	TRUE	TRUE	TRUE	TRUE		TRUE	TRUE			TRUE					TRUE
Gohir.A01G135100	AT3G12170		Chaperone DnaJ-domain superfamily protein		TRUE																											TRUE		TRUE	TRUE	TRUE	TRUE	TRUE		TRUE	TRUE			TRUE					TRUE
Gohir.A01G135200	AT3G11820	AT-SYR1,ATSYP121,ATSYR1,PEN1,SYP121,SYR1	syntaxin of plants 121																													TRUE		TRUE	TRUE	TRUE	TRUE	TRUE		TRUE	TRUE			TRUE					TRUE
Gohir.A01G135300	AT3G11750	FOLB1	Dihydroneopterin aldolase	TRUE	TRUE																											TRUE		TRUE	TRUE	TRUE	TRUE	TRUE		TRUE	TRUE			TRUE					TRUE
Gohir.A01G135400	AT5G06440																															TRUE		TRUE	TRUE	TRUE	TRUE	TRUE		TRUE	TRUE			TRUE					TRUE
Gohir.A01G135500	AT3G10660	ATCPK2,CPK2	calmodulin-domain protein kinase cdpk isoform 2																													TRUE		TRUE	TRUE	TRUE	TRUE	TRUE		TRUE	TRUE			TRUE					TRUE
Gohir.A01G135600	AT3G11690																															TRUE		TRUE	TRUE	TRUE	TRUE	TRUE		TRUE	TRUE			TRUE					TRUE
Gohir.A01G135700	AT3G17611	ATRBL14,RBL14	RHOMBOID-like protein 14		TRUE																											TRUE		TRUE	TRUE	TRUE	TRUE	TRUE		TRUE	TRUE			TRUE					TRUE
Gohir.A01G135800	AT1G06820	CCR2,CRTISO	carotenoid isomerase	TRUE	TRUE																											TRUE		TRUE	TRUE	TRUE	TRUE	TRUE		TRUE	TRUE			TRUE					TRUE
Gohir.A01G135900	AT5G06530		ABC-2 type transporter family protein		TRUE																											TRUE		TRUE	TRUE	TRUE	TRUE	TRUE		TRUE	TRUE			TRUE					TRUE
Gohir.A01G136000				TRUE	TRUE																											TRUE		TRUE	TRUE	TRUE	TRUE	TRUE		TRUE	TRUE			TRUE					TRUE
Gohir.A01G136100	AT5G06560		Protein of unknown function, DUF593	TRUE	TRUE	TRUE																										TRUE		TRUE	TRUE	TRUE	TRUE	TRUE		TRUE	TRUE			TRUE					TRUE
Gohir.A01G136200	AT2G37270	ATRPS5B,RPS5B	ribosomal protein 5B																													TRUE		TRUE	TRUE	TRUE	TRUE	TRUE		TRUE	TRUE			TRUE					TRUE
Gohir.A01G136300	AT5G03850		Nucleic acid-binding, OB-fold-like protein																													TRUE		TRUE	TRUE	TRUE	TRUE	TRUE		TRUE	TRUE			TRUE					TRUE
Gohir.A01G136400	AT3G11950		TRAF-like superfamily protein			TRUE																										TRUE		TRUE	TRUE	TRUE	TRUE	TRUE		TRUE	TRUE			TRUE					TRUE
Gohir.A01G136500																																TRUE		TRUE	TRUE	TRUE	TRUE	TRUE		TRUE	TRUE			TRUE					TRUE
Gohir.A01G136600				TRUE	TRUE																											TRUE		TRUE	TRUE	TRUE	TRUE	TRUE		TRUE	TRUE			TRUE					TRUE
Gohir.A01G136700	AT5G06710	HAT14	homeobox from Arabidopsis thaliana		TRUE																											TRUE		TRUE	TRUE	TRUE	TRUE	TRUE		TRUE	TRUE			TRUE					TRUE
Gohir.A01G136800	AT5G06700	TBR	Plant protein of unknown function (DUF828)																													TRUE		TRUE	TRUE	TRUE	TRUE	TRUE		TRUE	TRUE			TRUE					TRUE
Gohir.A01G136900	AT2G41970		Protein kinase superfamily protein																													TRUE		TRUE	TRUE	TRUE	TRUE	TRUE		TRUE	TRUE			TRUE					TRUE
Gohir.A01G137000	AT3G58040	SINAT2	seven in absentia of Arabidopsis 2																													TRUE		TRUE	TRUE	TRUE	TRUE	TRUE		TRUE	TRUE			TRUE					TRUE
Gohir.A01G137100	AT3G58050			TRUE	TRUE																											TRUE		TRUE	TRUE	TRUE	TRUE	TRUE		TRUE	TRUE			TRUE					TRUE
Gohir.A01G137200	AT2G41950																															TRUE		TRUE	TRUE	TRUE	TRUE	TRUE		TRUE	TRUE			TRUE					TRUE
Gohir.A01G137300	AT3G12010				TRUE																											TRUE		TRUE	TRUE	TRUE	TRUE	TRUE		TRUE	TRUE			TRUE					TRUE
Gohir.A01G137400	AT3G12012	CPuORF20	conserved peptide upstream open reading frame 20																													TRUE		TRUE	TRUE	TRUE	TRUE	TRUE		TRUE	TRUE			TRUE					TRUE
Gohir.A01G137500	AT2G41940	ZFP8	zinc finger protein 8																													TRUE		TRUE	TRUE	TRUE	TRUE	TRUE		TRUE	TRUE			TRUE					TRUE
Gohir.A01G137600					TRUE																											TRUE		TRUE	TRUE	TRUE	TRUE	TRUE		TRUE	TRUE			TRUE					TRUE
Gohir.A01G137700	AT3G21420		2-oxoglutarate (2OG) and Fe(II)-dependent oxygenase superfamily protein																													TRUE		TRUE	TRUE	TRUE	TRUE	TRUE		TRUE	TRUE			TRUE					TRUE
Gohir.A01G137800	AT3G52580		Ribosomal protein S11 family protein																													TRUE		TRUE	TRUE	TRUE	TRUE	TRUE		TRUE	TRUE			TRUE					TRUE
Gohir.A01G137900	AT1G27700		Syntaxin/t-SNARE family protein	TRUE	TRUE																											TRUE		TRUE	TRUE	TRUE	TRUE	TRUE		TRUE	TRUE			TRUE					TRUE
Gohir.A01G138000	AT5G15770	AtGNA1,GNA1	glucose-6-phosphate acetyltransferase 1	TRUE	TRUE																											TRUE		TRUE	TRUE	TRUE	TRUE	TRUE		TRUE	TRUE			TRUE					TRUE
Gohir.A01G138100	AT5G03905		Iron-sulphur cluster biosynthesis family protein	TRUE	TRUE																											TRUE		TRUE	TRUE	TRUE	TRUE	TRUE		TRUE	TRUE			TRUE					TRUE
Gohir.A01G138200	AT3G52730		ubiquinol-cytochrome C reductase UQCRX/QCR9-like family protein																													TRUE		TRUE	TRUE	TRUE	TRUE	TRUE		TRUE	TRUE			TRUE					TRUE
Gohir.A01G138300	AT2G36290		alpha/beta-Hydrolases superfamily protein																													TRUE		TRUE	TRUE	TRUE	TRUE	TRUE		TRUE	TRUE			TRUE					TRUE
Gohir.A01G138400	AT3G10070	TAF12,TAFII58	TBP-associated factor 12	TRUE	TRUE																											TRUE		TRUE	TRUE	TRUE	TRUE	TRUE		TRUE	TRUE			TRUE					TRUE
Gohir.A01G138500	AT3G52760		Integral membrane Yip1 family protein																													TRUE		TRUE	TRUE	TRUE	TRUE	TRUE		TRUE	TRUE			TRUE					TRUE
Gohir.A01G138600	AT3G52870		IQ calmodulin-binding motif family protein	TRUE	TRUE	TRUE																										TRUE		TRUE	TRUE	TRUE	TRUE	TRUE		TRUE	TRUE			TRUE					TRUE
Gohir.A01G138700	AT5G03670																															TRUE		TRUE	TRUE	TRUE	TRUE	TRUE		TRUE	TRUE			TRUE					TRUE
Gohir.A01G138800	AT2G36450	HRD	Integrase-type DNA-binding superfamily protein	TRUE	TRUE		TRUE																									TRUE		TRUE	TRUE	TRUE	TRUE	TRUE		TRUE	TRUE			TRUE					TRUE
Gohir.A01G138900																																TRUE		TRUE	TRUE	TRUE	TRUE	TRUE		TRUE	TRUE			TRUE					TRUE
Gohir.A01G139000	AT5G03680	PTL	Duplicated homeodomain-like superfamily protein	TRUE	TRUE	TRUE																										TRUE		TRUE	TRUE	TRUE	TRUE	TRUE		TRUE	TRUE			TRUE					TRUE
Gohir.A01G139100	AT1G67190		F-box/RNI-like superfamily protein																													TRUE		TRUE	TRUE	TRUE	TRUE	TRUE		TRUE	TRUE			TRUE					TRUE
Gohir.A01G139200	AT1G24050		RNA-processing, Lsm domain																													TRUE		TRUE	TRUE	TRUE	TRUE	TRUE		TRUE	TRUE			TRUE					TRUE
Gohir.A01G139300	AT1G10550	XET,XTH33	xyloglucan:xyloglucosyl transferase 33																													TRUE		TRUE	TRUE	TRUE	TRUE	TRUE		TRUE	TRUE			TRUE					TRUE
Gohir.A01G139400	AT2G34680	AIR9	Outer arm dynein light chain 1 protein	TRUE	TRUE																											TRUE		TRUE	TRUE	TRUE	TRUE	TRUE		TRUE	TRUE			TRUE					TRUE
Gohir.A01G139500	AT1G24020	MLP423	MLP-like protein 423																													TRUE		TRUE	TRUE	TRUE	TRUE	TRUE		TRUE	TRUE			TRUE					TRUE
Gohir.A01G139600	AT2G37035																															TRUE		TRUE	TRUE	TRUE	TRUE	TRUE		TRUE	TRUE			TRUE					TRUE
Gohir.A01G139700	AT2G34250		SecY protein transport family protein		TRUE																											TRUE		TRUE	TRUE	TRUE	TRUE	TRUE		TRUE	TRUE			TRUE					TRUE
Gohir.A01G139800	AT2G27770		Plant protein of unknown function (DUF868)																													TRUE		TRUE	TRUE	TRUE	TRUE	TRUE		TRUE	TRUE			TRUE					TRUE
Gohir.A01G139900	AT5G03730	AtCTR1,CTR1,SIS1	Protein kinase superfamily protein																													TRUE		TRUE	TRUE	TRUE	TRUE	TRUE		TRUE	TRUE			TRUE					TRUE
Gohir.A01G140000					TRUE																											TRUE		TRUE	TRUE	TRUE	TRUE	TRUE		TRUE	TRUE			TRUE					TRUE
Gohir.A01G140100	AT4G12080	AHL1,ATAHL1	AT-hook motif nuclear-localized protein 1																													TRUE		TRUE	TRUE	TRUE	TRUE	TRUE		TRUE	TRUE			TRUE					TRUE
Gohir.A01G140200	AT2G36630		Sulfite exporter TauE/SafE family protein		TRUE																											TRUE		TRUE	TRUE	TRUE	TRUE	TRUE		TRUE	TRUE			TRUE					TRUE
Gohir.A01G140300	ATCG00330		chloroplast ribosomal protein S14																													TRUE		TRUE	TRUE	TRUE	TRUE	TRUE		TRUE	TRUE			TRUE					TRUE
Gohir.A01G140400	AT2G38280	ATAMPD,FAC1	AMP deaminase putative / myoadenylate deaminase putative	TRUE	TRUE	TRUE																										TRUE		TRUE	TRUE	TRUE	TRUE	TRUE		TRUE	TRUE			TRUE					TRUE
Gohir.A01G140500	AT1G09600		Protein kinase superfamily protein	TRUE	TRUE																											TRUE		TRUE	TRUE	TRUE	TRUE	TRUE		TRUE	TRUE			TRUE					TRUE
Gohir.A01G140600	AT1G09610		Protein of unknown function (DUF579)		TRUE	TRUE																										TRUE		TRUE	TRUE	TRUE	TRUE	TRUE		TRUE	TRUE			TRUE					TRUE
Gohir.A01G140700	AT2G06050	DDE1,OPR3	oxophytodienoate-reductase 3																													TRUE		TRUE	TRUE	TRUE	TRUE	TRUE		TRUE	TRUE			TRUE					TRUE
Gohir.A01G140800	AT5G08680		ATP synthase alpha/beta family protein																													TRUE		TRUE	TRUE	TRUE	TRUE	TRUE		TRUE	TRUE			TRUE					TRUE
Gohir.A01G140900	AT5G13260																															TRUE		TRUE	TRUE	TRUE	TRUE	TRUE		TRUE	TRUE			TRUE					TRUE
Gohir.A01G141000	AT1G52310		protein kinase family protein / C-type lectin domain-containing protein			TRUE																										TRUE		TRUE	TRUE	TRUE	TRUE	TRUE		TRUE	TRUE			TRUE					TRUE
Gohir.A01G141100	AT3G23255			TRUE	TRUE																											TRUE		TRUE	TRUE	TRUE	TRUE	TRUE		TRUE	TRUE			TRUE					TRUE
Gohir.A01G141200	AT1G10520		DNA polymerase lambda (POLL)	TRUE	TRUE																											TRUE		TRUE	TRUE	TRUE	TRUE	TRUE		TRUE	TRUE			TRUE					TRUE
Gohir.A01G141300	AT5G40240		nodulin MtN21 /EamA-like transporter family protein		TRUE																											TRUE		TRUE	TRUE	TRUE	TRUE	TRUE		TRUE	TRUE			TRUE					TRUE
Gohir.A01G141400	AT1G60070		Adaptor protein complex AP-1 gamma subunit																													TRUE		TRUE	TRUE	TRUE	TRUE	TRUE		TRUE	TRUE			TRUE					TRUE
Gohir.A01G141500	AT1G59710		Protein of unknown function (DUF569)																													TRUE		TRUE	TRUE	TRUE	TRUE	TRUE		TRUE	TRUE			TRUE					TRUE
Gohir.A01G141600	AT1G70300	KUP6	K+ uptake permease 6			TRUE																										TRUE		TRUE	TRUE	TRUE	TRUE	TRUE		TRUE	TRUE			TRUE					TRUE
Gohir.A01G141700	AT3G46100	ATHRS1,HRS1	Histidyl-tRNA synthetase 1																													TRUE		TRUE	TRUE	TRUE	TRUE	TRUE		TRUE	TRUE			TRUE					TRUE
Gohir.A01G141800	AT3G51030	ATTRX H1,ATTRX1,TRX1	thioredoxin H-type 1																													TRUE		TRUE	TRUE	TRUE	TRUE	TRUE		TRUE	TRUE			TRUE					TRUE
Gohir.A01G141900																																TRUE		TRUE	TRUE	TRUE	TRUE	TRUE		TRUE	TRUE			TRUE					TRUE
Gohir.A01G142000	AT1G69970	CLE26	CLAVATA3/ESR-RELATED 26																													TRUE		TRUE	TRUE	TRUE	TRUE	TRUE		TRUE	TRUE			TRUE					TRUE
Gohir.A01G142100	AT1G27150		Tetratricopeptide repeat (TPR)-like superfamily protein																													TRUE		TRUE	TRUE	TRUE	TRUE	TRUE		TRUE	TRUE			TRUE					TRUE
Gohir.A01G142200	AT5G27730		Protein of unknown function (DUF1624)																													TRUE		TRUE	TRUE	TRUE	TRUE	TRUE		TRUE	TRUE			TRUE					TRUE
Gohir.A01G142300	AT5G03470	ATB\' ALPHA	Protein phosphatase 2A regulatory B subunit family protein																													TRUE		TRUE	TRUE	TRUE	TRUE	TRUE		TRUE	TRUE			TRUE					TRUE
Gohir.A01G142400	AT5G03530	ATRAB,ATRAB ALPHA,ATRAB18B,ATRABC2A,RABC2A	RAB GTPase homolog C2A																													TRUE		TRUE	TRUE	TRUE	TRUE	TRUE		TRUE	TRUE			TRUE					TRUE
Gohir.A01G142500	AT1G59820	ALA3	aminophospholipid ATPase 3	TRUE	TRUE																											TRUE		TRUE	TRUE	TRUE	TRUE	TRUE		TRUE	TRUE			TRUE					TRUE
Gohir.A01G142600	AT5G15680		ARM repeat superfamily protein																													TRUE		TRUE	TRUE	TRUE	TRUE	TRUE		TRUE	TRUE			TRUE					TRUE
Gohir.A01G142700	AT1G23540	AtPERK12,IGI1	Protein kinase superfamily protein																													TRUE		TRUE	TRUE	TRUE	TRUE	TRUE		TRUE	TRUE			TRUE					TRUE
Gohir.A01G142800	AT1G14700	ATPAP3,PAP3	purple acid phosphatase 3																													TRUE		TRUE	TRUE	TRUE	TRUE	TRUE		TRUE	TRUE			TRUE					TRUE
Gohir.A01G142900	AT1G75240	AtHB33,HB33	homeobox protein 33																													TRUE		TRUE	TRUE	TRUE	TRUE	TRUE		TRUE	TRUE			TRUE					TRUE
Gohir.A01G143000	AT1G25240		ENTH/VHS/GAT family protein																													TRUE		TRUE	TRUE	TRUE	TRUE	TRUE		TRUE	TRUE			TRUE					TRUE
Gohir.A01G143100	AT2G01930	ATBPC1,BBR,BPC1	basic pentacysteine1																													TRUE		TRUE	TRUE	TRUE	TRUE	TRUE		TRUE	TRUE			TRUE					TRUE
Gohir.A01G143200				TRUE	TRUE																											TRUE		TRUE	TRUE	TRUE	TRUE	TRUE		TRUE	TRUE			TRUE					TRUE
Gohir.A01G143300																																TRUE		TRUE	TRUE	TRUE	TRUE	TRUE		TRUE	TRUE			TRUE					TRUE
Gohir.A01G143400	ATCG01050		NADH-Ubiquinone/plastoquinone (complex I) protein	TRUE	TRUE																											TRUE		TRUE	TRUE	TRUE	TRUE	TRUE		TRUE	TRUE			TRUE					TRUE
Gohir.A01G143500	AT1G73110		P-loop containing nucleoside triphosphate hydrolases superfamily protein		TRUE																											TRUE		TRUE	TRUE	TRUE	TRUE	TRUE		TRUE	TRUE			TRUE					TRUE
Gohir.A01G143600	AT1G14550		Peroxidase superfamily protein																													TRUE		TRUE	TRUE	TRUE	TRUE	TRUE		TRUE	TRUE			TRUE					TRUE
Gohir.A01G143700	AT2G35640		Homeodomain-like superfamily protein																													TRUE		TRUE	TRUE	TRUE	TRUE	TRUE		TRUE	TRUE			TRUE					TRUE
Gohir.A01G143800	AT3G47990	SIS3	SUGAR-INSENSITIVE 3			TRUE																										TRUE		TRUE	TRUE	TRUE	TRUE	TRUE		TRUE	TRUE			TRUE					TRUE
Gohir.A01G143900	AT2G02080	AtIDD4,IDD4	indeterminate(ID)-domain 4		TRUE																											TRUE		TRUE	TRUE	TRUE	TRUE	TRUE		TRUE	TRUE			TRUE					TRUE
Gohir.A01G144000	AT1G75010	ARC3	GTP binding																													TRUE		TRUE	TRUE	TRUE	TRUE	TRUE		TRUE	TRUE			TRUE					TRUE
Gohir.A01G144100	AT2G40260		Homeodomain-like superfamily protein																													TRUE		TRUE	TRUE	TRUE	TRUE	TRUE		TRUE	TRUE			TRUE					TRUE
Gohir.A01G144200	AT2G02050		NADH-ubiquinone oxidoreductase B18 subunit putative																													TRUE		TRUE	TRUE	TRUE	TRUE	TRUE		TRUE	TRUE			TRUE					TRUE
Gohir.A01G144300	AT2G02040	ATPTR2,ATPTR2-B,NTR1,PTR2,PTR2-B	peptide transporter 2																													TRUE		TRUE	TRUE	TRUE	TRUE	TRUE		TRUE	TRUE			TRUE					TRUE
Gohir.A01G144400	AT2G02010	GAD4	glutamate decarboxylase 4																													TRUE		TRUE	TRUE	TRUE	TRUE	TRUE		TRUE	TRUE			TRUE					TRUE
Gohir.A01G144500	AT2G37870		Bifunctional inhibitor/lipid-transfer protein/seed storage 2S albumin superfamily protein	TRUE	TRUE																											TRUE		TRUE	TRUE	TRUE	TRUE	TRUE		TRUE	TRUE			TRUE					TRUE
Gohir.A01G144600	AT1G14630				TRUE																											TRUE		TRUE	TRUE	TRUE	TRUE	TRUE		TRUE	TRUE			TRUE					TRUE
Gohir.A01G144700	AT4G13420	ATHAK5,HAK5	high affinity K+ transporter 5																													TRUE		TRUE	TRUE	TRUE	TRUE	TRUE		TRUE	TRUE			TRUE					TRUE
Gohir.A01G144800	AT2G01970		Endomembrane protein 70 protein family																													TRUE		TRUE	TRUE	TRUE	TRUE	TRUE		TRUE	TRUE			TRUE					TRUE
Gohir.A01G144900	AT1G59960		NAD(P)-linked oxidoreductase superfamily protein	TRUE	TRUE	TRUE																										TRUE		TRUE	TRUE	TRUE	TRUE	TRUE		TRUE	TRUE			TRUE					TRUE
Gohir.A01G145000	AT1G59960		NAD(P)-linked oxidoreductase superfamily protein																													TRUE		TRUE	TRUE	TRUE	TRUE	TRUE		TRUE	TRUE			TRUE					TRUE
Gohir.A01G145100	AT2G01950	BRL2,VH1	BRI1-like 2	TRUE	TRUE																											TRUE		TRUE	TRUE	TRUE	TRUE	TRUE		TRUE	TRUE			TRUE					TRUE
Gohir.A01G145200	AT2G01940	ATIDD15,SGR5	C2H2-like zinc finger protein	TRUE	TRUE	TRUE																										TRUE		TRUE	TRUE	TRUE	TRUE	TRUE		TRUE	TRUE			TRUE					TRUE
Gohir.A01G145300	AT2G45220		Plant invertase/pectin methylesterase inhibitor superfamily																													TRUE		TRUE	TRUE	TRUE	TRUE	TRUE		TRUE	TRUE			TRUE					TRUE
Gohir.A01G145400	AT2G45220		Plant invertase/pectin methylesterase inhibitor superfamily	TRUE	TRUE	TRUE																										TRUE		TRUE	TRUE	TRUE	TRUE	TRUE		TRUE	TRUE			TRUE					TRUE
Gohir.A01G145500	AT1G70730		Phosphoglucomutase/phosphomannomutase family protein	TRUE	TRUE																											TRUE		TRUE	TRUE	TRUE	TRUE			TRUE	TRUE			TRUE					TRUE
Gohir.A01G145600	AT1G70740		Protein kinase superfamily protein																													TRUE		TRUE	TRUE	TRUE	TRUE			TRUE	TRUE			TRUE					TRUE
Gohir.A01G145700	AT4G38360	LAZ1	Protein of unknown function (DUF300)																													TRUE		TRUE	TRUE	TRUE	TRUE			TRUE	TRUE			TRUE					TRUE
Gohir.A01G145800	AT2G02170		Remorin family protein		TRUE																											TRUE		TRUE	TRUE	TRUE	TRUE			TRUE	TRUE			TRUE					TRUE
Gohir.A01G145900	AT3G19900			TRUE	TRUE																											TRUE		TRUE	TRUE	TRUE	TRUE			TRUE	TRUE			TRUE					TRUE
Gohir.A01G146000	AT5G08290	YLS8	mRNA splicing factor thioredoxin-like U5 snRNP																													TRUE		TRUE	TRUE	TRUE	TRUE			TRUE	TRUE			TRUE					TRUE
Gohir.A01G146100	AT3G19895		RING/U-box superfamily protein	TRUE	TRUE																											TRUE		TRUE	TRUE	TRUE	TRUE			TRUE	TRUE			TRUE					TRUE
Gohir.A01G146200	AT3G19850		Phototropic-responsive NPH3 family protein																													TRUE		TRUE	TRUE	TRUE	TRUE			TRUE	TRUE			TRUE					TRUE
Gohir.A01G146300	AT1G50300	TAF15	TBP-associated factor 15																													TRUE		TRUE	TRUE	TRUE	TRUE			TRUE	TRUE			TRUE					TRUE
Gohir.A01G146400	AT1G24764	ATMAP70-2,MAP70-2	microtubule-associated proteins 70-2																													TRUE		TRUE	TRUE	TRUE	TRUE			TRUE	TRUE			TRUE					TRUE
Gohir.A01G146500																																TRUE		TRUE	TRUE	TRUE	TRUE			TRUE	TRUE			TRUE					TRUE
Gohir.A01G146600	AT2G01740		Tetratricopeptide repeat (TPR)-like superfamily protein																													TRUE		TRUE	TRUE	TRUE	TRUE			TRUE	TRUE			TRUE					TRUE
Gohir.A01G146700	AT1G25054		UDP-3-O-acyl N-acetylglycosamine deacetylase family protein																													TRUE		TRUE	TRUE	TRUE	TRUE			TRUE	TRUE			TRUE					TRUE
Gohir.A01G146800	AT1G68070		Zinc finger C3HC4 type (RING finger) family protein																													TRUE		TRUE	TRUE	TRUE	TRUE			TRUE	TRUE			TRUE					TRUE
Gohir.A01G146900																																TRUE		TRUE	TRUE	TRUE	TRUE			TRUE	TRUE			TRUE					TRUE
Gohir.A01G147000	AT2G01690		ARM repeat superfamily protein		TRUE	TRUE																										TRUE		TRUE	TRUE	TRUE	TRUE			TRUE	TRUE			TRUE					TRUE
Gohir.A01G147100	AT2G01680		Ankyrin repeat family protein	TRUE	TRUE																											TRUE		TRUE	TRUE	TRUE	TRUE			TRUE	TRUE			TRUE					TRUE
Gohir.A01G147200	AT1G24620		EF hand calcium-binding protein family	TRUE	TRUE																											TRUE		TRUE	TRUE	TRUE	TRUE			TRUE	TRUE			TRUE					TRUE
Gohir.A01G147300	AT1G67920																															TRUE		TRUE	TRUE	TRUE	TRUE			TRUE	TRUE			TRUE					TRUE
Gohir.A01G147400	AT1G14860	atnudt18,NUDT18	nudix hydrolase homolog 18		TRUE																											TRUE		TRUE	TRUE	TRUE	TRUE			TRUE	TRUE			TRUE					TRUE
Gohir.A01G147500																																TRUE		TRUE	TRUE	TRUE	TRUE			TRUE	TRUE			TRUE					TRUE
Gohir.A01G147600	AT1G23260	MMZ1,UEV1A	MMS ZWEI homologue 1																													TRUE		TRUE	TRUE	TRUE	TRUE			TRUE	TRUE			TRUE					TRUE
Gohir.A01G147700	AT1G14700	ATPAP3,PAP3	purple acid phosphatase 3																													TRUE		TRUE	TRUE	TRUE	TRUE			TRUE	TRUE			TRUE					TRUE
Gohir.A01G147800	AT1G70670		Caleosin-related family protein																													TRUE		TRUE	TRUE	TRUE	TRUE			TRUE	TRUE			TRUE					TRUE
Gohir.A01G147900	AT2G01650	PUX2	plant UBX domain-containing protein 2																													TRUE		TRUE	TRUE	TRUE	TRUE			TRUE	TRUE			TRUE					TRUE
Gohir.A01G148000	AT5G17190																															TRUE		TRUE	TRUE	TRUE	TRUE			TRUE	TRUE			TRUE					TRUE
Gohir.A01G148100	AT5G67360	ARA12	Subtilase family protein																													TRUE		TRUE	TRUE	TRUE	TRUE			TRUE	TRUE			TRUE					TRUE
Gohir.A01G148200	AT1G27700		Syntaxin/t-SNARE family protein																													TRUE		TRUE	TRUE	TRUE	TRUE			TRUE	TRUE			TRUE					TRUE
Gohir.A01G148300	AT5G48810	ATB5-B,ATCB5-D,B5 #3,CB5-D	cytochrome B5 isoform D			TRUE																										TRUE		TRUE	TRUE	TRUE	TRUE			TRUE	TRUE			TRUE					TRUE
Gohir.A01G148400	AT4G24220	AWI31,VEP1	NAD(P)-binding Rossmann-fold superfamily protein			TRUE																										TRUE		TRUE	TRUE	TRUE	TRUE			TRUE	TRUE			TRUE					TRUE
Gohir.A01G148500																																TRUE		TRUE	TRUE	TRUE	TRUE			TRUE	TRUE			TRUE					TRUE
Gohir.A01G148600	AT1G55570	sks12	SKU5 similar 12																													TRUE		TRUE	TRUE	TRUE	TRUE			TRUE	TRUE			TRUE					TRUE
Gohir.A01G148700	AT3G17860	JAI3,JAZ3,TIFY6B	jasmonate-zim-domain protein 3																													TRUE		TRUE	TRUE	TRUE	TRUE			TRUE	TRUE			TRUE					TRUE
Gohir.A01G148800	AT3G18570		Oleosin family protein																													TRUE		TRUE	TRUE	TRUE	TRUE			TRUE	TRUE			TRUE					TRUE
Gohir.A01G148900	AT2G01630		O-Glycosyl hydrolases family 17 protein	TRUE	TRUE																											TRUE		TRUE	TRUE	TRUE	TRUE			TRUE	TRUE			TRUE					TRUE
Gohir.A01G149000	AT2G01620	MEE11	RNI-like superfamily protein																													TRUE		TRUE	TRUE	TRUE	TRUE			TRUE	TRUE			TRUE					TRUE
Gohir.A01G149100	AT1G29450		SAUR-like auxin-responsive protein family																													TRUE		TRUE	TRUE	TRUE	TRUE			TRUE	TRUE			TRUE					TRUE
Gohir.A01G149200	AT1G23220		Dynein light chain type 1 family protein																													TRUE		TRUE	TRUE	TRUE	TRUE			TRUE	TRUE			TRUE					TRUE
Gohir.A01G149300	AT1G14870	PCR2	PLANT CADMIUM RESISTANCE 2																													TRUE		TRUE	TRUE	TRUE	TRUE			TRUE	TRUE			TRUE					TRUE
Gohir.A01G149400	AT1G14870	PCR2	PLANT CADMIUM RESISTANCE 2																													TRUE		TRUE	TRUE	TRUE	TRUE			TRUE	TRUE			TRUE					TRUE
Gohir.A01G149500	AT1G14870	PCR2	PLANT CADMIUM RESISTANCE 2																													TRUE		TRUE	TRUE	TRUE	TRUE			TRUE	TRUE			TRUE					TRUE
Gohir.A01G149600	AT3G63530	BB,BB2	RING/U-box superfamily protein																													TRUE		TRUE	TRUE	TRUE	TRUE			TRUE	TRUE			TRUE					TRUE
Gohir.A01G149700	AT1G14870	PCR2	PLANT CADMIUM RESISTANCE 2																													TRUE		TRUE	TRUE	TRUE	TRUE			TRUE	TRUE			TRUE					TRUE
Gohir.A01G149800	AT1G70710	ATGH9B1,CEL1,GH9B1	glycosyl hydrolase 9B1																													TRUE		TRUE	TRUE	TRUE	TRUE			TRUE	TRUE			TRUE					TRUE
Gohir.A01G149900																																TRUE		TRUE	TRUE	TRUE	TRUE			TRUE	TRUE			TRUE					TRUE
Gohir.A01G150000	AT1G70750		Protein of unknown function, DUF593	TRUE	TRUE																											TRUE		TRUE	TRUE	TRUE	TRUE			TRUE	TRUE			TRUE					TRUE
Gohir.A01G150100	AT1G23170		Protein of unknown function DUF2359, transmembrane		TRUE																											TRUE		TRUE	TRUE	TRUE	TRUE			TRUE	TRUE			TRUE					TRUE
Gohir.A01G150200	AT2G01570	RGA,RGA1	GRAS family transcription factor family protein			TRUE																										TRUE		TRUE	TRUE	TRUE	TRUE			TRUE	TRUE			TRUE					TRUE
Gohir.A01G150300	AT1G70780																															TRUE		TRUE	TRUE	TRUE	TRUE			TRUE	TRUE			TRUE					TRUE
Gohir.A01G150400	AT1G70782	CPuORF28	conserved peptide upstream open reading frame 28																													TRUE		TRUE	TRUE	TRUE	TRUE			TRUE	TRUE			TRUE					TRUE
Gohir.A01G150500																																TRUE		TRUE	TRUE	TRUE	TRUE			TRUE	TRUE			TRUE					TRUE
Gohir.A01G150600	AT1G70820		phosphoglucomutase, putative / glucose phosphomutase, putative																													TRUE		TRUE	TRUE	TRUE	TRUE			TRUE	TRUE			TRUE					TRUE
Gohir.A01G150700																																TRUE		TRUE	TRUE	TRUE	TRUE			TRUE	TRUE			TRUE					TRUE
Gohir.A01G150800	AT1G70830	MLP28	MLP-like protein 28																													TRUE		TRUE	TRUE	TRUE	TRUE			TRUE	TRUE			TRUE					TRUE
Gohir.A01G150900	AT2G01480		O-fucosyltransferase family protein																													TRUE		TRUE	TRUE	TRUE	TRUE			TRUE	TRUE			TRUE					TRUE
Gohir.A01G151000	AT3G21470		Pentatricopeptide repeat (PPR-like) superfamily protein	TRUE	TRUE																											TRUE		TRUE	TRUE	TRUE	TRUE			TRUE	TRUE			TRUE					TRUE
Gohir.A01G151100	AT4G17040	CLPR4	CLP protease R subunit 4	TRUE	TRUE																											TRUE		TRUE	TRUE	TRUE	TRUE			TRUE	TRUE			TRUE					TRUE
Gohir.A01G151200	AT2G01490		phytanoyl-CoA dioxygenase (PhyH) family protein	TRUE	TRUE																											TRUE		TRUE	TRUE	TRUE	TRUE			TRUE	TRUE			TRUE					TRUE
Gohir.A01G151300	AT3G18010	WOX1	WUSCHEL related homeobox 1																													TRUE		TRUE	TRUE	TRUE	TRUE			TRUE	TRUE			TRUE					TRUE
Gohir.A01G151400	AT1G23110			TRUE	TRUE																											TRUE		TRUE	TRUE	TRUE	TRUE			TRUE	TRUE			TRUE					TRUE
Gohir.A01G151500	AT1G18160		Protein kinase superfamily protein																													TRUE		TRUE	TRUE	TRUE	TRUE			TRUE	TRUE			TRUE					TRUE
Gohir.A01G151600	AT4G13690				TRUE																											TRUE		TRUE	TRUE	TRUE	TRUE			TRUE	TRUE			TRUE					TRUE
Gohir.A01G151700	AT1G80110	ATPP2-B11,PP2-B11	phloem protein 2-B11																													TRUE		TRUE	TRUE	TRUE	TRUE			TRUE	TRUE			TRUE					TRUE
Gohir.A01G151800	AT4G27940	ATMTM1,MTM1	manganese tracking factor for mitochondrial SOD2		TRUE																											TRUE		TRUE	TRUE	TRUE	TRUE			TRUE	TRUE			TRUE					TRUE
Gohir.A01G151900	AT5G63100		S-adenosyl-L-methionine-dependent methyltransferases superfamily protein		TRUE																											TRUE		TRUE	TRUE	TRUE	TRUE			TRUE	TRUE			TRUE					TRUE
Gohir.A01G152000	AT1G70940	ATPIN3,PIN3	Auxin efflux carrier family protein																													TRUE		TRUE	TRUE	TRUE	TRUE			TRUE	TRUE			TRUE					TRUE
Gohir.A01G152100	AT5G42930		alpha/beta-Hydrolases superfamily protein	TRUE	TRUE																											TRUE		TRUE	TRUE	TRUE	TRUE			TRUE	TRUE			TRUE					TRUE
Gohir.A01G152200	AT1G45249	ABF2,AREB1,ATAREB1	abscisic acid responsive elements-binding factor 2																													TRUE		TRUE	TRUE	TRUE	TRUE			TRUE	TRUE			TRUE					TRUE
Gohir.A01G152300																																TRUE		TRUE	TRUE	TRUE	TRUE			TRUE	TRUE			TRUE					TRUE
Gohir.A01G152400	AT1G23040		hydroxyproline-rich glycoprotein family protein																													TRUE		TRUE	TRUE	TRUE	TRUE			TRUE	TRUE			TRUE					TRUE
Gohir.A01G152500	AT5G19120		Eukaryotic aspartyl protease family protein																													TRUE		TRUE	TRUE	TRUE	TRUE			TRUE	TRUE			TRUE					TRUE
Gohir.A01G152600	AT2G01410		NHL domain-containing protein																													TRUE		TRUE	TRUE	TRUE	TRUE			TRUE	TRUE			TRUE					TRUE
Gohir.A01G152700	AT2G01400																															TRUE		TRUE	TRUE	TRUE	TRUE			TRUE	TRUE			TRUE					TRUE
Gohir.A01G152800	AT2G01350	QPT	quinolinate phoshoribosyltransferase	TRUE	TRUE																											TRUE		TRUE	TRUE	TRUE	TRUE			TRUE	TRUE			TRUE					TRUE
Gohir.A01G152900	AT1G71010	FAB1C	FORMS APLOID AND BINUCLEATE CELLS 1C		TRUE																											TRUE		TRUE	TRUE	TRUE	TRUE			TRUE	TRUE			TRUE					TRUE
Gohir.A01G153000	AT2G01340	At17.1																														TRUE		TRUE	TRUE	TRUE	TRUE			TRUE	TRUE			TRUE					TRUE
Gohir.A01G153100	AT1G23030		ARM repeat superfamily protein																													TRUE		TRUE	TRUE	TRUE	TRUE			TRUE	TRUE			TRUE					TRUE
Gohir.A01G153200	AT4G38620	ATMYB4,MYB4	myb domain protein 4		TRUE	TRUE																										TRUE		TRUE	TRUE	TRUE	TRUE			TRUE	TRUE			TRUE					TRUE
Gohir.A01G153300	AT3G18060		transducin family protein / WD-40 repeat family protein		TRUE																											TRUE		TRUE	TRUE	TRUE	TRUE			TRUE	TRUE			TRUE					TRUE
Gohir.A01G153400	AT1G71070		Core-2/I-branching beta-1,6-N-acetylglucosaminyltransferase family protein																													TRUE		TRUE	TRUE	TRUE	TRUE			TRUE	TRUE			TRUE					TRUE
Gohir.A01G153500	AT2G01320		ABC-2 type transporter family protein	TRUE	TRUE																											TRUE		TRUE	TRUE	TRUE	TRUE			TRUE	TRUE			TRUE					TRUE
Gohir.A01G153600	AT2G01300				TRUE																											TRUE		TRUE	TRUE	TRUE	TRUE			TRUE	TRUE			TRUE					TRUE
Gohir.A01G153700	AT2G01290	RPI2	ribose-5-phosphate isomerase 2																													TRUE		TRUE	TRUE	TRUE	TRUE			TRUE	TRUE			TRUE					TRUE
Gohir.A01G153800	AT2G01275		RING/FYVE/PHD zinc finger superfamily protein																													TRUE		TRUE	TRUE	TRUE	TRUE			TRUE	TRUE			TRUE					TRUE
Gohir.A01G153900	AT1G27980	ATDPL1,DPL1	dihydrosphingosine phosphate lyase	TRUE	TRUE																											TRUE		TRUE	TRUE	TRUE	TRUE			TRUE	TRUE			TRUE					TRUE
Gohir.A01G154000	AT5G13080	ATWRKY75,WRKY75	WRKY DNA-binding protein 75																													TRUE		TRUE	TRUE	TRUE	TRUE			TRUE	TRUE			TRUE					TRUE
Gohir.A01G154100	AT5G50570		Squamosa promoter-binding protein-like (SBP domain) transcription factor family protein	TRUE	TRUE																											TRUE		TRUE	TRUE	TRUE	TRUE			TRUE	TRUE			TRUE					TRUE
Gohir.A01G154200	AT1G27970	NTF2B	nuclear transport factor 2B																													TRUE		TRUE	TRUE	TRUE	TRUE			TRUE	TRUE			TRUE					TRUE
Gohir.A01G154300	AT1G27320	AHK3,HK3	histidine kinase 3	TRUE	TRUE	TRUE																										TRUE		TRUE	TRUE	TRUE	TRUE			TRUE	TRUE			TRUE					TRUE
Gohir.A01G154400	AT1G27330		Ribosome associated membrane protein RAMP4	TRUE	TRUE																											TRUE		TRUE	TRUE	TRUE	TRUE			TRUE	TRUE			TRUE					TRUE
Gohir.A01G154500	AT1G27340		Galactose oxidase/kelch repeat superfamily protein	TRUE	TRUE																											TRUE		TRUE	TRUE	TRUE	TRUE			TRUE	TRUE			TRUE					TRUE
Gohir.A01G154600	AT5G43270	SPL2	squamosa promoter binding protein-like 2																													TRUE		TRUE	TRUE	TRUE	TRUE			TRUE	TRUE			TRUE					TRUE
Gohir.A01G154700	AT3G13060	ECT5	evolutionarily conserved C-terminal region 5	TRUE	TRUE																											TRUE		TRUE	TRUE	TRUE	TRUE			TRUE	TRUE			TRUE					TRUE
Gohir.A01G154800	AT1G27950	LTPG1	glycosylphosphatidylinositol-anchored lipid protein transfer 1		TRUE	TRUE																										TRUE		TRUE	TRUE	TRUE	TRUE			TRUE	TRUE			TRUE					TRUE
Gohir.A01G154900	AT3G01860					TRUE																										TRUE		TRUE	TRUE	TRUE	TRUE			TRUE	TRUE			TRUE					TRUE
Gohir.A01G155000	AT1G67490	GCS1,KNF	glucosidase 1		TRUE																											TRUE		TRUE	TRUE	TRUE	TRUE			TRUE	TRUE			TRUE					TRUE
Gohir.A01G155100	AT1G67480		Galactose oxidase/kelch repeat superfamily protein		TRUE																											TRUE		TRUE	TRUE	TRUE	TRUE			TRUE	TRUE			TRUE					TRUE
Gohir.A01G155200																																TRUE		TRUE	TRUE	TRUE	TRUE			TRUE	TRUE			TRUE					TRUE
Gohir.A01G155300																																TRUE		TRUE	TRUE	TRUE	TRUE			TRUE	TRUE			TRUE					TRUE
Gohir.A01G155400	AT4G40042		Microsomal signal peptidase 12 kDa subunit (SPC12)	TRUE	TRUE																											TRUE		TRUE	TRUE	TRUE	TRUE			TRUE	TRUE			TRUE					TRUE
Gohir.A01G155500	AT1G67430		Ribosomal protein L22p/L17e family protein																													TRUE		TRUE	TRUE	TRUE	TRUE			TRUE	TRUE			TRUE					TRUE
Gohir.A01G155600	AT5G63400	ADK1	adenylate kinase 1																													TRUE		TRUE	TRUE	TRUE	TRUE			TRUE	TRUE			TRUE					TRUE
Gohir.A01G155700																																TRUE		TRUE	TRUE	TRUE	TRUE			TRUE	TRUE			TRUE					TRUE
Gohir.A01G155800	AT1G67590		Remorin family protein	TRUE	TRUE	TRUE																										TRUE		TRUE	TRUE	TRUE	TRUE			TRUE	TRUE			TRUE					TRUE
Gohir.A01G155900	AT4G38700		Disease resistance-responsive (dirigent-like protein) family protein																													TRUE		TRUE	TRUE	TRUE	TRUE			TRUE	TRUE			TRUE					TRUE
Gohir.A01G156000	AT4G38700		Disease resistance-responsive (dirigent-like protein) family protein		TRUE																											TRUE		TRUE	TRUE	TRUE	TRUE			TRUE	TRUE			TRUE					TRUE
Gohir.A01G156100	AT5G47030		ATPase, F1 complex, delta/epsilon subunit		TRUE																											TRUE		TRUE	TRUE	TRUE	TRUE			TRUE	TRUE			TRUE					TRUE
Gohir.A01G156200	AT1G27880		DEAD/DEAH box RNA helicase family protein	TRUE	TRUE	TRUE																										TRUE		TRUE	TRUE	TRUE	TRUE			TRUE	TRUE			TRUE					TRUE
Gohir.A01G156300	AT3G25980	MAD2	DNA-binding HORMA family protein		TRUE																											TRUE		TRUE	TRUE	TRUE	TRUE			TRUE	TRUE			TRUE					TRUE
Gohir.A01G156400	AT1G13450		Homeodomain-like superfamily protein		TRUE																											TRUE		TRUE	TRUE	TRUE	TRUE			TRUE	TRUE			TRUE					TRUE
Gohir.A01G156500	AT3G27320		alpha/beta-Hydrolases superfamily protein																													TRUE		TRUE	TRUE	TRUE	TRUE			TRUE	TRUE			TRUE					TRUE
Gohir.A01G156600	AT4G38200		SEC7-like guanine nucleotide exchange family protein	TRUE	TRUE																											TRUE		TRUE	TRUE	TRUE	TRUE			TRUE	TRUE			TRUE					TRUE
Gohir.A01G156700	AT3G48460		GDSL-like Lipase/Acylhydrolase superfamily protein																													TRUE		TRUE	TRUE	TRUE	TRUE			TRUE	TRUE			TRUE					TRUE
Gohir.A01G156800	AT1G24460			TRUE	TRUE	TRUE																										TRUE		TRUE	TRUE	TRUE	TRUE			TRUE	TRUE			TRUE					TRUE
Gohir.A01G156900	AT1G67740	PSBY,YCF32	photosystem II BY																													TRUE		TRUE	TRUE	TRUE	TRUE			TRUE	TRUE			TRUE					TRUE
Gohir.A01G157000	AT1G67750		Pectate lyase family protein	TRUE	TRUE																											TRUE		TRUE	TRUE	TRUE	TRUE			TRUE	TRUE			TRUE					TRUE
Gohir.A01G157100	AT2G01050		zinc ion binding;nucleic acid binding																													TRUE		TRUE	TRUE	TRUE	TRUE			TRUE	TRUE			TRUE					TRUE
Gohir.A01G157200	AT1G24510		TCP-1/cpn60 chaperonin family protein		TRUE																											TRUE		TRUE	TRUE	TRUE	TRUE			TRUE	TRUE			TRUE					TRUE
Gohir.A01G157300	AT2G23890		HAD-superfamily hydrolase, subfamily IG, 5\'-nucleotidase																													TRUE		TRUE	TRUE	TRUE	TRUE			TRUE	TRUE			TRUE					TRUE
Gohir.A01G157400																																TRUE		TRUE	TRUE	TRUE	TRUE			TRUE	TRUE			TRUE					TRUE
Gohir.A01G157500																																TRUE		TRUE	TRUE	TRUE	TRUE			TRUE	TRUE			TRUE					TRUE
Gohir.A01G157600	AT1G13180	ARP3,ATARP3,DIS1	Actin-like ATPase superfamily protein																													TRUE		TRUE	TRUE	TRUE	TRUE			TRUE	TRUE			TRUE					TRUE
Gohir.A01G157700	AT5G50260		Cysteine proteinases superfamily protein	TRUE	TRUE																											TRUE		TRUE	TRUE	TRUE	TRUE			TRUE	TRUE			TRUE					TRUE
Gohir.A01G157800	AT1G67785																															TRUE		TRUE	TRUE	TRUE	TRUE			TRUE	TRUE			TRUE					TRUE
Gohir.A01G157900	AT3G28345		ABC transporter family protein	TRUE	TRUE																											TRUE		TRUE	TRUE	TRUE	TRUE			TRUE	TRUE			TRUE					TRUE
Gohir.A01G158000	AT1G24530		Transducin/WD40 repeat-like superfamily protein																													TRUE		TRUE	TRUE	TRUE	TRUE			TRUE	TRUE			TRUE					TRUE
Gohir.A01G158100																																TRUE		TRUE	TRUE	TRUE	TRUE			TRUE	TRUE			TRUE					TRUE
Gohir.A01G158200	AT1G67360		Rubber elongation factor protein (REF)																													TRUE		TRUE	TRUE	TRUE	TRUE			TRUE	TRUE			TRUE					TRUE
Gohir.A01G158300	AT1G67340		HCP-like superfamily protein with MYND-type zinc finger																													TRUE		TRUE	TRUE	TRUE	TRUE			TRUE	TRUE			TRUE					TRUE
Gohir.A01G158400	AT1G13130		Cellulase (glycosyl hydrolase family 5) protein	TRUE	TRUE																											TRUE		TRUE	TRUE	TRUE	TRUE			TRUE	TRUE			TRUE					TRUE
Gohir.A01G158500	AT1G18350	ATMKK7,BUD1,MKK7	MAP kinase kinase 7																													TRUE		TRUE	TRUE	TRUE	TRUE			TRUE	TRUE			TRUE					TRUE
Gohir.A01G158600	AT3G55270	ATMKP1,MKP1	mitogen-activated protein kinase phosphatase 1		TRUE																											TRUE		TRUE	TRUE	TRUE	TRUE			TRUE	TRUE			TRUE					TRUE
Gohir.A01G158700	AT1G13030		sphere organelles protein-related	TRUE	TRUE																											TRUE		TRUE	TRUE	TRUE	TRUE			TRUE	TRUE			TRUE					TRUE
Gohir.A01G158800	AT1G67856		RING/U-box superfamily protein																													TRUE		TRUE	TRUE	TRUE	TRUE			TRUE	TRUE			TRUE					TRUE
Gohir.A01G158900	AT1G12990		beta-1,4-N-acetylglucosaminyltransferase family protein																													TRUE		TRUE	TRUE	TRUE	TRUE			TRUE	TRUE			TRUE					TRUE
Gohir.A01G159000	AT1G67900		Phototropic-responsive NPH3 family protein																													TRUE		TRUE	TRUE	TRUE	TRUE			TRUE	TRUE			TRUE					TRUE
Gohir.A01G159100	AT1G24590	DRN-LIKE,DRNL,ESR2,SOB2	DORNROSCHEN-like	TRUE	TRUE																											TRUE		TRUE	TRUE	TRUE	TRUE			TRUE	TRUE			TRUE					TRUE
Gohir.A01G159200	AT1G10740		alpha/beta-Hydrolases superfamily protein	TRUE	TRUE																											TRUE		TRUE	TRUE	TRUE	TRUE			TRUE	TRUE			TRUE					TRUE
Gohir.A01G159300	AT1G70590		F-box family protein																													TRUE		TRUE	TRUE	TRUE	TRUE			TRUE	TRUE			TRUE					TRUE
Gohir.A01G159400	AT2G42490		Copper amine oxidase family protein	TRUE	TRUE																											TRUE		TRUE	TRUE	TRUE	TRUE			TRUE	TRUE			TRUE					TRUE
Gohir.A01G159500	AT1G70600		Ribosomal protein L18e/L15 superfamily protein																													TRUE		TRUE	TRUE	TRUE	TRUE			TRUE	TRUE			TRUE					TRUE
Gohir.A01G159600	AT3G26580		Tetratricopeptide repeat (TPR)-like superfamily protein																													TRUE		TRUE	TRUE	TRUE	TRUE			TRUE	TRUE			TRUE					TRUE
Gohir.A01G159700	AT1G70610	ATTAP1,TAP1	transporter associated with antigen processing protein 1			TRUE																										TRUE		TRUE	TRUE	TRUE	TRUE			TRUE	TRUE			TRUE					TRUE
Gohir.A01G159800	AT1G10750		Protein of Unknown Function (DUF239)																													TRUE		TRUE	TRUE	TRUE	TRUE			TRUE	TRUE			TRUE					TRUE
Gohir.A01G159900	AT1G10760	GWD,GWD1,SEX1,SOP,SOP1	Pyruvate phosphate dikinase, PEP/pyruvate binding domain	TRUE	TRUE																											TRUE		TRUE	TRUE	TRUE	TRUE			TRUE	TRUE			TRUE					TRUE
Gohir.A01G160000	AT1G23360	MENG	S-adenosyl-L-methionine-dependent methyltransferases superfamily protein																													TRUE		TRUE	TRUE	TRUE	TRUE			TRUE	TRUE			TRUE					TRUE
Gohir.A01G160100	AT1G23390		Kelch repeat-containing F-box family protein			TRUE																										TRUE		TRUE	TRUE	TRUE	TRUE			TRUE	TRUE			TRUE					TRUE
Gohir.A01G160200	AT1G73805		Calmodulin binding protein-like																													TRUE		TRUE	TRUE	TRUE	TRUE			TRUE	TRUE			TRUE					TRUE
Gohir.A01G160300	AT1G27385																															TRUE		TRUE	TRUE	TRUE	TRUE			TRUE	TRUE			TRUE					TRUE
Gohir.A01G160400	AT1G67330		Protein of unknown function (DUF579)																													TRUE		TRUE	TRUE	TRUE	TRUE			TRUE	TRUE			TRUE					TRUE
Gohir.A01G160500	AT3G26340		N-terminal nucleophile aminohydrolases (Ntn hydrolases) superfamily protein																													TRUE		TRUE	TRUE	TRUE	TRUE			TRUE	TRUE			TRUE					TRUE
Gohir.A01G160600	AT1G67410		Exostosin family protein		TRUE																											TRUE		TRUE	TRUE	TRUE	TRUE			TRUE	TRUE			TRUE					TRUE
Gohir.A01G160700	AT2G01050		zinc ion binding;nucleic acid binding																													TRUE		TRUE	TRUE	TRUE	TRUE			TRUE	TRUE			TRUE					TRUE
Gohir.A01G160800	AT1G67420		Zn-dependent exopeptidases superfamily protein			TRUE																										TRUE		TRUE	TRUE	TRUE	TRUE			TRUE	TRUE			TRUE					TRUE
Gohir.A01G160900	AT1G67420		Zn-dependent exopeptidases superfamily protein	TRUE	TRUE																											TRUE		TRUE	TRUE	TRUE	TRUE			TRUE	TRUE			TRUE					TRUE
Gohir.A01G161000	AT5G14230			TRUE	TRUE																											TRUE		TRUE	TRUE	TRUE	TRUE			TRUE	TRUE			TRUE					TRUE
Gohir.A01G161100	AT3G01810			TRUE	TRUE																											TRUE		TRUE	TRUE	TRUE	TRUE			TRUE	TRUE			TRUE					TRUE
Gohir.A01G161200	AT3G57810		Cysteine proteinases superfamily protein																													TRUE		TRUE	TRUE	TRUE	TRUE			TRUE	TRUE			TRUE					TRUE
Gohir.A01G161300	AT1G24330		ARM repeat superfamily protein	TRUE	TRUE																											TRUE		TRUE	TRUE	TRUE	TRUE			TRUE	TRUE			TRUE					TRUE
Gohir.A01G161400	AT5G46210	ATCUL4,CUL4	cullin4																													TRUE		TRUE	TRUE	TRUE	TRUE			TRUE	TRUE			TRUE					TRUE
Gohir.A01G161500					TRUE																											TRUE		TRUE	TRUE	TRUE	TRUE			TRUE	TRUE			TRUE					TRUE
Gohir.A01G161600	AT1G70480		Domain of unknown function (DUF220)	TRUE	TRUE																											TRUE		TRUE	TRUE	TRUE	TRUE			TRUE	TRUE			TRUE					TRUE
Gohir.A01G161700	AT1G10630	ARFA1F,ATARFA1F	ADP-ribosylation factor A1F		TRUE																											TRUE		TRUE	TRUE	TRUE	TRUE			TRUE	TRUE			TRUE					TRUE
Gohir.A01G161800	AT1G60490	ATVPS34,PI3K,VPS34	vacuolar protein sorting 34		TRUE																											TRUE		TRUE	TRUE	TRUE	TRUE			TRUE	TRUE			TRUE					TRUE
Gohir.A01G161900																																TRUE		TRUE	TRUE	TRUE	TRUE			TRUE	TRUE			TRUE					TRUE
Gohir.A01G162000	AT1G23460		Pectin lyase-like superfamily protein	TRUE	TRUE																											TRUE		TRUE	TRUE	TRUE	TRUE			TRUE	TRUE			TRUE					TRUE
Gohir.A01G162100	AT1G06140		Pentatricopeptide repeat (PPR) superfamily protein																													TRUE		TRUE	TRUE	TRUE	TRUE			TRUE	TRUE			TRUE					TRUE
Gohir.A01G162200	AT2G27790		RNA-binding (RRM/RBD/RNP motifs) family protein																													TRUE		TRUE	TRUE	TRUE	TRUE			TRUE	TRUE			TRUE					TRUE
Gohir.A01G162300	AT1G10650		SBP (S-ribonuclease binding protein) family protein	TRUE	TRUE																											TRUE		TRUE	TRUE	TRUE	TRUE			TRUE	TRUE			TRUE					TRUE
Gohir.A01G162400	AT1G10657		Plant protein 1589 of unknown function		TRUE																											TRUE		TRUE	TRUE	TRUE	TRUE			TRUE	TRUE			TRUE					TRUE
Gohir.A01G162500	AT1G23420	INO	Plant-specific transcription factor YABBY family protein																													TRUE		TRUE	TRUE	TRUE	TRUE			TRUE	TRUE			TRUE					TRUE
Gohir.A01G162600	AT1G08220																															TRUE		TRUE	TRUE	TRUE	TRUE			TRUE	TRUE			TRUE					TRUE
Gohir.A01G162700	AT3G61470	LHCA2	photosystem I light harvesting complex gene 2		TRUE																											TRUE		TRUE	TRUE	TRUE	TRUE			TRUE	TRUE			TRUE					TRUE
Gohir.A01G162800	AT5G11860	SSP5	SCP1-like small phosphatase 5																													TRUE		TRUE	TRUE	TRUE	TRUE			TRUE	TRUE			TRUE					TRUE
Gohir.A01G162900	AT1G74110	CYP78A10	cytochrome P450, family 78, subfamily A, polypeptide 10	TRUE	TRUE																											TRUE		TRUE	TRUE	TRUE	TRUE			TRUE	TRUE			TRUE					TRUE
Gohir.A01G163000	AT3G26400	EIF4B1	eukaryotic translation initiation factor 4B1																													TRUE		TRUE	TRUE	TRUE	TRUE			TRUE	TRUE			TRUE					TRUE
Gohir.A01G163100	AT4G00430	PIP1;4,PIP1E,TMP-C	plasma membrane intrinsic protein 1;4	TRUE	TRUE																											TRUE		TRUE	TRUE	TRUE	TRUE			TRUE	TRUE			TRUE					TRUE
Gohir.A01G163200	ATCG00590		electron carriers																													TRUE		TRUE	TRUE	TRUE	TRUE			TRUE	TRUE			TRUE					TRUE
Gohir.A01G163300	AT2G21190		ER lumen protein retaining receptor family protein	TRUE	TRUE																											TRUE		TRUE	TRUE	TRUE	TRUE			TRUE	TRUE			TRUE					TRUE
Gohir.A01G163400	AT4G30150			TRUE	TRUE																											TRUE		TRUE	TRUE	TRUE	TRUE			TRUE	TRUE			TRUE					TRUE
Gohir.A01G163500	AT5G19875																															TRUE		TRUE	TRUE	TRUE	TRUE			TRUE	TRUE			TRUE					TRUE
Gohir.A01G163600	AT2G21170	PDTPI,TIM	triosephosphate isomerase																													TRUE		TRUE	TRUE	TRUE	TRUE			TRUE	TRUE			TRUE					TRUE
Gohir.A01G163700	AT5G07900		Mitochondrial transcription termination factor family protein	TRUE	TRUE																											TRUE		TRUE	TRUE	TRUE	TRUE			TRUE	TRUE			TRUE					TRUE
Gohir.A01G163800																																TRUE		TRUE	TRUE	TRUE	TRUE			TRUE	TRUE			TRUE					TRUE
Gohir.A01G163900	AT1G27970	NTF2B	nuclear transport factor 2B		TRUE																											TRUE		TRUE	TRUE	TRUE	TRUE			TRUE	TRUE			TRUE					TRUE
Gohir.A01G164000	AT2G16595		Translocon-associated protein (TRAP), alpha subunit																													TRUE		TRUE	TRUE	TRUE	TRUE			TRUE	TRUE			TRUE					TRUE
Gohir.A01G164100	AT2G21140	ATPRP2,PRP2	proline-rich protein 2	TRUE	TRUE	TRUE																										TRUE		TRUE	TRUE	TRUE	TRUE			TRUE	TRUE			TRUE					TRUE
Gohir.A01G164200	AT2G16600	ROC3	rotamase CYP 3																													TRUE		TRUE	TRUE	TRUE	TRUE			TRUE	TRUE			TRUE					TRUE
Gohir.A01G164300	AT2G16630		Pollen Ole e 1 allergen and extensin family protein	TRUE	TRUE																											TRUE		TRUE	TRUE	TRUE	TRUE			TRUE	TRUE			TRUE					TRUE
Gohir.A01G164400	AT4G34880		Amidase family protein																													TRUE		TRUE	TRUE	TRUE	TRUE			TRUE	TRUE			TRUE					TRUE
Gohir.A01G164500	ATCG00350		Photosystem I, PsaA/PsaB protein																													TRUE		TRUE	TRUE	TRUE	TRUE			TRUE	TRUE			TRUE					TRUE
Gohir.A01G164600	ATCG00350		Photosystem I, PsaA/PsaB protein																													TRUE		TRUE	TRUE	TRUE	TRUE			TRUE	TRUE			TRUE					TRUE
Gohir.A01G164700	ATCG00340		Photosystem I, PsaA/PsaB protein																													TRUE		TRUE	TRUE	TRUE	TRUE			TRUE	TRUE			TRUE					TRUE
Gohir.A01G164800	ATCG00300		YCF9																													TRUE		TRUE	TRUE	TRUE	TRUE			TRUE	TRUE			TRUE					TRUE
Gohir.A01G164900	AT4G17910		transferases, transferring acyl groups																													TRUE		TRUE	TRUE	TRUE	TRUE			TRUE	TRUE			TRUE					TRUE
Gohir.A01G165000	AT2G21110		Disease resistance-responsive (dirigent-like protein) family protein																													TRUE		TRUE	TRUE	TRUE	TRUE			TRUE	TRUE			TRUE					TRUE
Gohir.A01G165100	AT2G21110		Disease resistance-responsive (dirigent-like protein) family protein		TRUE																											TRUE		TRUE	TRUE	TRUE	TRUE			TRUE	TRUE			TRUE					TRUE
Gohir.A01G165200	AT4G38700		Disease resistance-responsive (dirigent-like protein) family protein																													TRUE		TRUE	TRUE	TRUE	TRUE			TRUE	TRUE			TRUE					TRUE
Gohir.A01G165300	AT1G26170		ARM repeat superfamily protein																													TRUE		TRUE	TRUE	TRUE	TRUE			TRUE	TRUE			TRUE					TRUE
Gohir.A01G165400	AT2G21110		Disease resistance-responsive (dirigent-like protein) family protein																													TRUE		TRUE	TRUE	TRUE	TRUE			TRUE	TRUE			TRUE					TRUE
Gohir.A01G165500	AT2G21060	ATCSP4,ATGRP2B,GRP2B	glycine-rich protein 2B																													TRUE		TRUE	TRUE	TRUE	TRUE			TRUE	TRUE			TRUE					TRUE
Gohir.A01G165600	AT1G57870	ATSK42,SK42	shaggy-like kinase 42	TRUE	TRUE																											TRUE		TRUE	TRUE	TRUE	TRUE			TRUE	TRUE			TRUE					TRUE
Gohir.A01G165700	AT2G21060	ATCSP4,ATGRP2B,GRP2B	glycine-rich protein 2B																													TRUE		TRUE	TRUE	TRUE	TRUE			TRUE	TRUE			TRUE					TRUE
Gohir.A01G165800																																TRUE		TRUE	TRUE	TRUE	TRUE			TRUE	TRUE			TRUE					TRUE
Gohir.A01G165900	AT2G21050	LAX2	like AUXIN RESISTANT 2		TRUE																											TRUE		TRUE	TRUE	TRUE	TRUE			TRUE	TRUE			TRUE					TRUE
Gohir.A01G166000	AT2G24960																															TRUE		TRUE	TRUE	TRUE	TRUE			TRUE	TRUE			TRUE					TRUE
Gohir.A01G166100	AT4G38670		Pathogenesis-related thaumatin superfamily protein																													TRUE		TRUE	TRUE	TRUE	TRUE			TRUE	TRUE			TRUE					TRUE
Gohir.A01G166200	AT4G38660		Pathogenesis-related thaumatin superfamily protein																													TRUE		TRUE	TRUE	TRUE	TRUE			TRUE	TRUE			TRUE					TRUE
Gohir.A01G166300	AT4G38650		Glycosyl hydrolase family 10 protein																													TRUE		TRUE	TRUE	TRUE	TRUE			TRUE	TRUE			TRUE					TRUE
Gohir.A01G166400	AT4G34950		Major facilitator superfamily protein	TRUE	TRUE																											TRUE		TRUE	TRUE	TRUE	TRUE			TRUE	TRUE			TRUE					TRUE
Gohir.A01G166500	AT2G33793				TRUE																											TRUE		TRUE	TRUE	TRUE	TRUE			TRUE	TRUE			TRUE					TRUE
Gohir.A01G166600																																TRUE		TRUE	TRUE	TRUE	TRUE			TRUE	TRUE			TRUE					TRUE
Gohir.A01G166700	AT4G38640		Plasma-membrane choline transporter family protein																													TRUE		TRUE	TRUE	TRUE	TRUE			TRUE	TRUE			TRUE					TRUE
Gohir.A01G166800	AT4G38630	ATMCB1,MBP1,MCB1,RPN10	regulatory particle non-ATPase 10	TRUE	TRUE																											TRUE		TRUE	TRUE	TRUE	TRUE			TRUE	TRUE			TRUE					TRUE
Gohir.A01G166900	AT2G16700	ADF5,ATADF5	actin depolymerizing factor 5	TRUE	TRUE																											TRUE		TRUE	TRUE	TRUE	TRUE			TRUE	TRUE			TRUE					TRUE
Gohir.A01G167000	AT4G34980	SLP2	subtilisin-like serine protease 2	TRUE	TRUE																											TRUE		TRUE	TRUE	TRUE	TRUE			TRUE	TRUE			TRUE					TRUE
Gohir.A01G167100	AT5G09220	AAP2	amino acid permease 2	TRUE	TRUE																											TRUE		TRUE	TRUE	TRUE	TRUE			TRUE	TRUE			TRUE					TRUE
Gohir.A01G167200																																TRUE		TRUE	TRUE	TRUE	TRUE			TRUE	TRUE			TRUE					TRUE
Gohir.A01G167300	AT4G38620	ATMYB4,MYB4	myb domain protein 4		TRUE																											TRUE		TRUE	TRUE	TRUE	TRUE			TRUE	TRUE			TRUE					TRUE
Gohir.A01G167400	AT4G35000	APX3	ascorbate peroxidase 3																													TRUE		TRUE	TRUE	TRUE	TRUE			TRUE	TRUE			TRUE					TRUE
Gohir.A01G167500	AT2G47760	ALG3,AtALG3	asparagine-linked glycosylation 3	TRUE	TRUE																											TRUE		TRUE	TRUE	TRUE	TRUE			TRUE	TRUE			TRUE					TRUE
Gohir.A01G167600	AT4G38600	KAK,UPL3	HEAT repeat ;HECT-domain (ubiquitin-transferase)	TRUE	TRUE																											TRUE		TRUE	TRUE	TRUE	TRUE			TRUE	TRUE			TRUE					TRUE
Gohir.A01G167700					TRUE																											TRUE		TRUE	TRUE	TRUE	TRUE			TRUE	TRUE			TRUE					TRUE
Gohir.A01G167800	AT5G06240	emb2735	embryo defective 2735	TRUE	TRUE																											TRUE		TRUE	TRUE	TRUE	TRUE			TRUE	TRUE			TRUE					TRUE
Gohir.A01G167900	AT2G16730	BGAL13	glycosyl hydrolase family 35 protein																													TRUE		TRUE	TRUE	TRUE	TRUE			TRUE	TRUE			TRUE					TRUE
Gohir.A01G168000	AT2G16730	BGAL13	glycosyl hydrolase family 35 protein																													TRUE		TRUE	TRUE	TRUE	TRUE			TRUE	TRUE			TRUE					TRUE
Gohir.A01G168100	AT2G20980	MCM10	minichromosome maintenance 10	TRUE	TRUE																											TRUE		TRUE	TRUE	TRUE	TRUE			TRUE	TRUE			TRUE					TRUE
Gohir.A01G168200	AT4G35020	ARAC3,ATROP6,RAC3,RHO1PS,ROP6	RAC-like 3		TRUE																											TRUE		TRUE	TRUE	TRUE	TRUE			TRUE	TRUE			TRUE					TRUE
Gohir.A01G168300	AT5G53300	UBC10	ubiquitin-conjugating enzyme 10		TRUE																											TRUE			TRUE	TRUE					TRUE			TRUE
Gohir.A01G168400	AT2G16750		Protein kinase protein with adenine nucleotide alpha hydrolases-like domain	TRUE	TRUE																											TRUE			TRUE	TRUE					TRUE			TRUE
Gohir.A01G168500	AT4G35040	bZIP19	Basic-leucine zipper (bZIP) transcription factor family protein		TRUE																											TRUE			TRUE	TRUE					TRUE			TRUE
Gohir.A01G168600					TRUE																											TRUE			TRUE	TRUE					TRUE			TRUE
Gohir.A01G168700	AT4G38580	ATFP6,FP6,HIPP26	farnesylated protein 6																													TRUE			TRUE	TRUE					TRUE			TRUE
Gohir.A01G168800	AT4G35070		SBP (S-ribonuclease binding protein) family protein																													TRUE			TRUE	TRUE					TRUE			TRUE
Gohir.A01G168900	AT1G68000	ATPIS,ATPIS1,PIS1	phosphatidylinositol synthase 1	TRUE	TRUE																											TRUE			TRUE	TRUE					TRUE			TRUE
Gohir.A01G169000	AT2G16800		high-affinity nickel-transport family protein																													TRUE			TRUE	TRUE					TRUE			TRUE
Gohir.A01G169100	AT1G68010	ATHPR1,HPR	hydroxypyruvate reductase																													TRUE			TRUE	TRUE					TRUE			TRUE
Gohir.A01G169200	AT1G75950	ASK1,ATSKP1,SKP1,SKP1A,UIP1	S phase kinase-associated protein 1			TRUE																										TRUE			TRUE	TRUE					TRUE			TRUE
Gohir.A01G169300					TRUE																											TRUE			TRUE	TRUE					TRUE			TRUE
Gohir.A01G169400	AT4G35100	PIP2;7,PIP3,PIP3A,SIMIP	plasma membrane intrinsic protein 3																													TRUE			TRUE	TRUE					TRUE			TRUE
Gohir.A01G169500	AT2G16860		GCIP-interacting family protein		TRUE																											TRUE			TRUE	TRUE					TRUE			TRUE
Gohir.A01G169600	AT5G26330		Cupredoxin superfamily protein	TRUE	TRUE																											TRUE			TRUE	TRUE					TRUE			TRUE
Gohir.A01G169700	AT1G20200	EMB2719,HAP15	PAM domain (PCI/PINT associated module) protein	TRUE	TRUE																											TRUE			TRUE	TRUE					TRUE			TRUE
Gohir.A01G169800	AT4G38540		FAD/NAD(P)-binding oxidoreductase family protein		TRUE																											TRUE			TRUE	TRUE					TRUE			TRUE
Gohir.A01G169900	AT5G05320		FAD/NAD(P)-binding oxidoreductase family protein																													TRUE			TRUE	TRUE					TRUE			TRUE
Gohir.A01G170000	AT4G38520		Protein phosphatase 2C family protein		TRUE																											TRUE			TRUE	TRUE					TRUE			TRUE
Gohir.A01G170100	AT1G21740		Protein of unknown function (DUF630 and DUF632)																													TRUE			TRUE	TRUE					TRUE			TRUE
Gohir.A01G170200	AT2G20920		Protein of unknown function (DUF3353)																													TRUE			TRUE	TRUE					TRUE			TRUE
Gohir.A01G170300	AT4G38500		Protein of unknown function (DUF616)																													TRUE			TRUE	TRUE					TRUE			TRUE
Gohir.A01G170400	AT5G23590		DNAJ heat shock N-terminal domain-containing protein	TRUE	TRUE																											TRUE			TRUE	TRUE					TRUE			TRUE
Gohir.A01G170500	AT5G03570	ATIREG2,FPN2,IREG2	iron regulated 2		TRUE																											TRUE			TRUE	TRUE					TRUE			TRUE
Gohir.A01G170600	AT2G16950	ATTRN1,TRN1	transportin 1	TRUE	TRUE																											TRUE			TRUE	TRUE					TRUE			TRUE
Gohir.A01G170700																																TRUE			TRUE	TRUE					TRUE			TRUE
Gohir.A01G170800	AT4G35130		Tetratricopeptide repeat (TPR)-like superfamily protein	TRUE	TRUE																											TRUE			TRUE	TRUE					TRUE			TRUE
Gohir.A01G170900				TRUE	TRUE																											TRUE			TRUE	TRUE					TRUE			TRUE
Gohir.A01G171000	AT2G16990		Major facilitator superfamily protein		TRUE																											TRUE			TRUE	TRUE					TRUE			TRUE
Gohir.A01G171100	AT4G35140		Transducin/WD40 repeat-like superfamily protein																													TRUE			TRUE	TRUE					TRUE			TRUE
Gohir.A01G171200	AT1G78610	MSL6	mechanosensitive channel of small conductance-like 6																													TRUE			TRUE	TRUE					TRUE			TRUE
Gohir.A01G171300	AT4G38470		ACT-like protein tyrosine kinase family protein		TRUE																											TRUE			TRUE	TRUE					TRUE			TRUE
Gohir.A01G171400	AT4G38460	GGR	geranylgeranyl reductase	TRUE	TRUE																											TRUE			TRUE	TRUE					TRUE			TRUE
Gohir.A01G171500					TRUE																											TRUE			TRUE	TRUE					TRUE			TRUE
Gohir.A01G171600	AT4G38440			TRUE	TRUE																											TRUE			TRUE	TRUE					TRUE			TRUE
Gohir.A01G171700	AT2G17030		F-box family protein with a domain of unknown function (DUF295)																													TRUE			TRUE	TRUE					TRUE			TRUE
Gohir.A01G171800	AT4G38430	ATROPGEF1,ROPGEF1	rho guanyl-nucleotide exchange factor 1	TRUE	TRUE																											TRUE			TRUE	TRUE					TRUE			TRUE
Gohir.A01G171900	AT1G16210			TRUE	TRUE																											TRUE			TRUE	TRUE					TRUE			TRUE
Gohir.A01G172000	AT5G55050		GDSL-like Lipase/Acylhydrolase superfamily protein																													TRUE			TRUE	TRUE					TRUE			TRUE
Gohir.A01G172100	AT1G76160	sks5	SKU5 similar 5		TRUE																											TRUE			TRUE	TRUE					TRUE			TRUE
Gohir.A01G172200	AT2G41990																															TRUE			TRUE	TRUE					TRUE			TRUE
Gohir.A01G172300	AT4G35180	LHT7	LYS/HIS transporter 7	TRUE	TRUE																											TRUE			TRUE	TRUE					TRUE			TRUE
Gohir.A01G172400	AT1G47670		Transmembrane amino acid transporter family protein																													TRUE			TRUE	TRUE					TRUE			TRUE
Gohir.A01G172500	AT1G29500		SAUR-like auxin-responsive protein family																													TRUE			TRUE	TRUE					TRUE			TRUE
Gohir.A01G172600	AT3G45970	ATEXLA1,ATEXPL1,ATHEXP BETA 2.1,EXLA1,EXPL1	expansin-like A1		TRUE																											TRUE			TRUE	TRUE					TRUE			TRUE
Gohir.A01G172700	AT4G35190		Putative lysine decarboxylase family protein																													TRUE			TRUE	TRUE					TRUE			TRUE
Gohir.A01G172800	AT3G12500	ATHCHIB,B-CHI,CHI-B,HCHIB,PR-3,PR3	basic chitinase	TRUE	TRUE																											TRUE			TRUE						TRUE			TRUE
Gohir.A01G172900	AT2G17080		Arabidopsis protein of unknown function (DUF241)	TRUE	TRUE																											TRUE			TRUE						TRUE			TRUE
Gohir.A01G173000	AT2G17080		Arabidopsis protein of unknown function (DUF241)	TRUE	TRUE																											TRUE			TRUE						TRUE			TRUE
Gohir.A01G173100	AT2G17080		Arabidopsis protein of unknown function (DUF241)																													TRUE			TRUE						TRUE			TRUE
Gohir.A01G173200	AT5G17240	SDG40	SET domain group 40	TRUE	TRUE																											TRUE			TRUE						TRUE			TRUE
Gohir.A01G173300	AT4G35230	BSK1	BR-signaling kinase 1		TRUE																											TRUE			TRUE						TRUE			TRUE
Gohir.A01G173400	AT4G35240		Protein of unknown function (DUF630 and DUF632)		TRUE																											TRUE			TRUE						TRUE			TRUE
Gohir.A01G173500	AT3G21000		Gag-Pol-related retrotransposon family protein																													TRUE			TRUE						TRUE			TRUE
Gohir.A01G173600				TRUE	TRUE																											TRUE			TRUE						TRUE			TRUE
Gohir.A01G173700	AT1G20550		O-fucosyltransferase family protein																													TRUE			TRUE						TRUE			TRUE
Gohir.A01G173800	AT2G17120	LYM2	lysm domain GPI-anchored protein 2 precursor	TRUE	TRUE																											TRUE			TRUE						TRUE			TRUE
Gohir.A01G173900	AT1G19250	FMO1	flavin-dependent monooxygenase 1																													TRUE			TRUE						TRUE			TRUE
Gohir.A01G174000																																TRUE			TRUE						TRUE			TRUE
Gohir.A01G174100	AT1G19250	FMO1	flavin-dependent monooxygenase 1																													TRUE			TRUE						TRUE			TRUE
Gohir.A01G174200	AT4G38360	LAZ1	Protein of unknown function (DUF300)																													TRUE			TRUE						TRUE			TRUE
Gohir.A01G174300	AT2G30920	ATCOQ3,COQ3,EMB3002	coenzyme Q 3																													TRUE			TRUE						TRUE			TRUE
Gohir.A01G174400	AT2G17980	ATSLY1	Sec1/munc18-like (SM) proteins superfamily																													TRUE			TRUE						TRUE			TRUE
Gohir.A01G174500	AT1G76310	CYCB2;4	CYCLIN B2;4																													TRUE			TRUE						TRUE			TRUE
Gohir.A01G174600	AT5G42340	PUB15	Plant U-Box 15																													TRUE			TRUE						TRUE			TRUE
Gohir.A01G174700	AT2G30920	ATCOQ3,COQ3,EMB3002	coenzyme Q 3																													TRUE			TRUE						TRUE			TRUE
Gohir.A01G174800	AT2G17200	DSK2	ubiquitin family protein																													TRUE			TRUE						TRUE			TRUE
Gohir.A01G174900	AT2G45250		Integral membrane protein hemolysin-III homolog																													TRUE			TRUE						TRUE			TRUE
Gohir.A01G175000	AT4G35280		C2H2-like zinc finger protein																													TRUE			TRUE						TRUE			TRUE
Gohir.A01G175100	AT4G35270		Plant regulator RWP-RK family protein																													TRUE			TRUE						TRUE			TRUE
Gohir.A01G175200	AT4G38350		Patched family protein																													TRUE			TRUE						TRUE			TRUE
Gohir.A01G175300	AT2G31740		S-adenosyl-L-methionine-dependent methyltransferases superfamily protein																													TRUE			TRUE						TRUE			TRUE
Gohir.A01G175400	AT1G76010		Alba DNA/RNA-binding protein																													TRUE			TRUE						TRUE			TRUE
Gohir.A01G175500	AT5G23280		TCP family transcription factor																													TRUE			TRUE						TRUE			TRUE
Gohir.A01G175600	AT5G44080		Basic-leucine zipper (bZIP) transcription factor family protein																													TRUE			TRUE						TRUE			TRUE
Gohir.A01G175700	AT1G25280	AtTLP10,TLP10	tubby like protein 10																													TRUE			TRUE						TRUE			TRUE
Gohir.A01G175800	AT1G25270		nodulin MtN21 /EamA-like transporter family protein			TRUE																										TRUE			TRUE						TRUE			TRUE
Gohir.A01G175900	AT5G09810	ACT7	actin 7																													TRUE			TRUE						TRUE			TRUE
Gohir.A01G176000																																TRUE			TRUE						TRUE			TRUE
Gohir.A01G176100																																TRUE			TRUE						TRUE			TRUE
Gohir.A01G176200	AT1G68290	ENDO 2	endonuclease 2																													TRUE			TRUE						TRUE			TRUE
Gohir.A01G176300	AT1G68150	ATWRKY9,WRKY9	WRKY DNA-binding protein 9		TRUE																											TRUE			TRUE						TRUE			TRUE
Gohir.A01G176400	AT1G36990			TRUE	TRUE																											TRUE			TRUE						TRUE			TRUE
Gohir.A01G176500	AT3G54630			TRUE	TRUE																											TRUE			TRUE						TRUE			TRUE
Gohir.A01G176600	AT4G22970	AESP,ESP,RSW4	homolog of separase																													TRUE			TRUE						TRUE			TRUE
Gohir.A01G176700	AT1G68140		Protein of unknown function (DUF1644)																													TRUE			TRUE						TRUE			TRUE
Gohir.A01G176800	AT5G09770		Ribosomal protein L17 family protein			TRUE																										TRUE			TRUE						TRUE			TRUE
Gohir.A01G176900	AT1G25260		Ribosomal protein L10 family protein																													TRUE			TRUE						TRUE			TRUE
Gohir.A01G177000	AT1G11400	PYM	partner of Y14-MAGO																													TRUE			TRUE						TRUE			TRUE
Gohir.A01G177100	AT2G01070		Lung seven transmembrane receptor family protein																													TRUE			TRUE						TRUE			TRUE
Gohir.A01G177200	AT3G49430	SRp34a	SER/ARG-rich protein 34A		TRUE																											TRUE			TRUE						TRUE			TRUE
Gohir.A01G177300	AT4G25980		Peroxidase superfamily protein																													TRUE			TRUE						TRUE			TRUE
Gohir.A01G177400																																TRUE			TRUE						TRUE			TRUE
Gohir.A01G177500	AT5G23570	ATSGS3,SGS3	XS domain-containing protein / XS zinc finger domain-containing protein-related	TRUE	TRUE																											TRUE			TRUE						TRUE			TRUE
Gohir.A01G177600	AT2G02850	ARPN	plantacyanin																													TRUE			TRUE						TRUE			TRUE
Gohir.A01G177700	AT5G06240	emb2735	embryo defective 2735		TRUE																											TRUE			TRUE						TRUE			TRUE
Gohir.A01G177800	AT3G26070		Plastid-lipid associated protein PAP / fibrillin family protein	TRUE	TRUE																											TRUE			TRUE						TRUE			TRUE
Gohir.A01G177900	AT1G71240		Plant protein of unknown function (DUF639)	TRUE	TRUE																											TRUE			TRUE						TRUE			TRUE
Gohir.A01G178000	AT3G06470		GNS1/SUR4 membrane protein family			TRUE																										TRUE			TRUE						TRUE			TRUE
Gohir.A01G178100	AT1G25290	ATRBL10,RBL10	RHOMBOID-like protein 10		TRUE																											TRUE			TRUE						TRUE			TRUE
Gohir.A01G178200	AT1G25290	ATRBL10,RBL10	RHOMBOID-like protein 10	TRUE	TRUE																											TRUE			TRUE						TRUE			TRUE
Gohir.A01G178300	AT5G47160		YDG/SRA domain-containing protein		TRUE																											TRUE			TRUE						TRUE			TRUE
Gohir.A01G178400	AT1G10780		F-box/RNI-like superfamily protein																													TRUE			TRUE						TRUE			TRUE
Gohir.A01G178500	AT1G49310																															TRUE			TRUE						TRUE			TRUE
Gohir.A01G178600	AT3G48860																															TRUE			TRUE						TRUE			TRUE
Gohir.A01G178700	AT5G64470	TBL12	Plant protein of unknown function (DUF828)																													TRUE			TRUE						TRUE			TRUE
Gohir.A01G178800	AT5G64500		Major facilitator superfamily protein																													TRUE			TRUE						TRUE			TRUE
Gohir.A01G178900	AT5G09650	AtPPa6,PPa6	pyrophosphorylase 6																													TRUE			TRUE						TRUE			TRUE
Gohir.A01G179000	AT2G14255		Ankyrin repeat family protein with DHHC zinc finger domain																													TRUE			TRUE						TRUE			TRUE
Gohir.A01G179100	AT4G37850		basic helix-loop-helix (bHLH) DNA-binding superfamily protein																													TRUE			TRUE						TRUE			TRUE
Gohir.A01G179200	AT5G64510																															TRUE			TRUE						TRUE			TRUE
Gohir.A01G179300	AT5G09660	PMDH2	peroxisomal NAD-malate dehydrogenase 2																													TRUE			TRUE						TRUE			TRUE
Gohir.A01G179400	AT5G27470		seryl-tRNA synthetase / serine--tRNA ligase																													TRUE			TRUE						TRUE			TRUE
Gohir.A01G179500	AT1G09970	LRR XI-23,RLK7	Leucine-rich receptor-like protein kinase family protein																													TRUE			TRUE						TRUE			TRUE
Gohir.A01G179600	AT1G50110		D-aminoacid aminotransferase-like PLP-dependent enzymes superfamily protein																													TRUE			TRUE						TRUE			TRUE
Gohir.A01G179700	AT4G33700		CBS domain-containing protein with a domain of unknown function (DUF21)																													TRUE			TRUE						TRUE			TRUE
Gohir.A01G179800	AT3G49720																															TRUE			TRUE						TRUE			TRUE
Gohir.A01G179900	AT2G14530	TBL13	TRICHOME BIREFRINGENCE-LIKE 13																													TRUE			TRUE						TRUE			TRUE
Gohir.A01G180000	AT1G50090		D-aminoacid aminotransferase-like PLP-dependent enzymes superfamily protein		TRUE	TRUE																										TRUE			TRUE						TRUE			TRUE
Gohir.A01G180100																																TRUE			TRUE						TRUE			TRUE
Gohir.A01G180200	AT4G33720		CAP (Cysteine-rich secretory proteins, Antigen 5, and Pathogenesis-related 1 protein) superfamily protein		TRUE																											TRUE			TRUE						TRUE			TRUE
Gohir.A01G180300	AT2G14580	ATPRB1,PRB1	basic pathogenesis-related protein 1	TRUE	TRUE																											TRUE			TRUE						TRUE			TRUE
Gohir.A01G180400	AT4G13420	ATHAK5,HAK5	high affinity K+ transporter 5																													TRUE			TRUE						TRUE			TRUE
Gohir.A01G180500																																TRUE			TRUE						TRUE			TRUE
Gohir.A01G180600	AT1G71430				TRUE	TRUE																										TRUE			TRUE						TRUE			TRUE
Gohir.A01G180700	AT2G14620	XTH10	xyloglucan endotransglucosylase/hydrolase 10	TRUE	TRUE																											TRUE			TRUE						TRUE			TRUE
Gohir.A01G180800	AT3G19680		Protein of unknown function (DUF1005)																													TRUE			TRUE						TRUE			TRUE
Gohir.A01G180900	AT4G33760		tRNA synthetase class II (D, K and N) family protein																													TRUE			TRUE						TRUE			TRUE
Gohir.A01G181000	AT5G66600		Protein of unknown function, DUF547																													TRUE			TRUE						TRUE			TRUE
Gohir.A01G181100	AT2G16070	PDV2	plastid division2																													TRUE			TRUE						TRUE			TRUE
Gohir.A01G181200	AT2G15980		Tetratricopeptide repeat (TPR)-like superfamily protein																													TRUE			TRUE						TRUE			TRUE
Gohir.A01G181300	AT3G50810		Uncharacterised protein family (UPF0497)																													TRUE			TRUE						TRUE			TRUE
Gohir.A01G181400	AT3G18930		RING/U-box superfamily protein																													TRUE			TRUE						TRUE			TRUE
Gohir.A01G181500	AT1G49430	LACS2,LRD2	long-chain acyl-CoA synthetase 2	TRUE	TRUE	TRUE																										TRUE			TRUE						TRUE			TRUE
Gohir.A01G181600	AT2G23460	ATXLG1,XLG1	extra-large G-protein 1	TRUE	TRUE	TRUE																										TRUE			TRUE						TRUE			TRUE
Gohir.A01G181700	AT2G15960																															TRUE			TRUE						TRUE			TRUE
Gohir.A01G181800	AT1G50030	TOR	target of rapamycin	TRUE	TRUE																											TRUE			TRUE						TRUE			TRUE
Gohir.A01G181900	AT2G26500		cytochrome b6f complex subunit (petM), putative	TRUE	TRUE																											TRUE			TRUE						TRUE			TRUE
Gohir.A01G182000	AT4G06634		zinc finger (C2H2 type) family protein		TRUE																											TRUE			TRUE						TRUE			TRUE
Gohir.A01G182100	AT5G23170		Protein kinase superfamily protein																													TRUE			TRUE						TRUE			TRUE
Gohir.A01G182200	AT1G58100		TCP family transcription factor			TRUE																										TRUE			TRUE						TRUE			TRUE
Gohir.A01G182300	AT1G71900		Protein of unknown function (DUF803)		TRUE																											TRUE			TRUE						TRUE			TRUE
Gohir.A01G182400	AT4G01500	NGA4	AP2/B3-like transcriptional factor family protein	TRUE	TRUE																											TRUE			TRUE						TRUE			TRUE
Gohir.A01G182500	AT4G01500	NGA4	AP2/B3-like transcriptional factor family protein	TRUE	TRUE																											TRUE			TRUE						TRUE			TRUE
Gohir.A01G182600	AT5G49940	ATCNFU2,NFU2	NIFU-like protein 2																													TRUE			TRUE						TRUE			TRUE
Gohir.A01G182700	AT1G58070				TRUE	TRUE																										TRUE			TRUE						TRUE			TRUE
Gohir.A01G182800	AT1G58060		RNA helicase family protein	TRUE	TRUE	TRUE																										TRUE			TRUE						TRUE			TRUE
Gohir.A01G182900	AT4G24330		Protein of unknown function (DUF1682)																													TRUE			TRUE						TRUE			TRUE
Gohir.A01G183000	AT5G49950		alpha/beta-Hydrolases superfamily protein																													TRUE			TRUE						TRUE			TRUE
Gohir.A01G183100	AT4G24320		Ubiquitin carboxyl-terminal hydrolase family protein	TRUE	TRUE																											TRUE			TRUE						TRUE			TRUE
Gohir.A01G183200	AT5G20900	JAZ12,TIFY3B	jasmonate-zim-domain protein 12	TRUE	TRUE																											TRUE			TRUE						TRUE			TRUE
Gohir.A01G183300	AT1G80740	CMT1,DMT4	chromomethylase 1	TRUE	TRUE																											TRUE			TRUE						TRUE			TRUE
Gohir.A01G183400	AT5G19780	TUA5	tubulin alpha-5																													TRUE			TRUE						TRUE			TRUE
Gohir.A01G183500	AT3G02430		Protein of unknown function (DUF679)	TRUE	TRUE	TRUE																										TRUE			TRUE						TRUE			TRUE
Gohir.A01G183600	AT1G58025		DNA-binding bromodomain-containing protein	TRUE	TRUE																											TRUE			TRUE						TRUE			TRUE
Gohir.A01G183700	AT1G58025		DNA-binding bromodomain-containing protein																													TRUE			TRUE						TRUE			TRUE
Gohir.A01G183800	AT1G09800		Pseudouridine synthase family protein																													TRUE			TRUE						TRUE			TRUE
Gohir.A01G183900	AT5G65700	BAM1	Leucine-rich receptor-like protein kinase family protein	TRUE	TRUE																											TRUE			TRUE						TRUE			TRUE
Gohir.A01G184000	AT1G61580	ARP2,RPL3B	R-protein L3 B																													TRUE			TRUE						TRUE			TRUE
Gohir.A01G184100	AT1G09812				TRUE																											TRUE			TRUE						TRUE			TRUE
Gohir.A01G184200	AT4G24290		MAC/Perforin domain-containing protein	TRUE	TRUE																											TRUE			TRUE						TRUE			TRUE
Gohir.A01G184300	AT4G24290		MAC/Perforin domain-containing protein	TRUE	TRUE																											TRUE			TRUE						TRUE			TRUE
Gohir.A01G184400																																TRUE			TRUE						TRUE			TRUE
Gohir.A01G184500	AT1G68510	LBD42	LOB domain-containing protein 42																													TRUE			TRUE						TRUE			TRUE
Gohir.A01G184600																																TRUE			TRUE						TRUE			TRUE
Gohir.A01G184700	AT1G68500																															TRUE			TRUE						TRUE			TRUE
Gohir.A01G184800	AT1G57770		FAD/NAD(P)-binding oxidoreductase family protein																													TRUE			TRUE						TRUE			TRUE
Gohir.A01G184900	AT1G09840	ATSK41,SK41	shaggy-like protein kinase 41		TRUE																											TRUE			TRUE						TRUE			TRUE
Gohir.A01G185000	AT1G09830		Glycinamide ribonucleotide (GAR) synthetase			TRUE																										TRUE			TRUE						TRUE			TRUE
Gohir.A01G185100	AT5G49920		Octicosapeptide/Phox/Bem1p family protein	TRUE	TRUE																											TRUE			TRUE						TRUE			TRUE
Gohir.A01G185200					TRUE																											TRUE			TRUE						TRUE			TRUE
Gohir.A01G185300	AT1G25440		B-box type zinc finger protein with CCT domain	TRUE	TRUE																											TRUE			TRUE						TRUE			TRUE
Gohir.A01G185400	AT1G68530	CER6,CUT1,G2,KCS6,POP1	3-ketoacyl-CoA synthase 6					TRUE																								TRUE			TRUE						TRUE			TRUE
Gohir.A01G185500	AT1G68320	AtMYB62,BW62B,BW62C,MYB62	myb domain protein 62	TRUE	TRUE																											TRUE			TRUE						TRUE			TRUE
Gohir.A01G185600	AT3G25220	FKBP15-1	FK506-binding protein 15 kD-1																													TRUE			TRUE						TRUE			TRUE
Gohir.A01G185700	AT3G06070																															TRUE			TRUE						TRUE			TRUE
Gohir.A01G185800	AT1G30960		GTP-binding family protein	TRUE	TRUE																											TRUE			TRUE						TRUE			TRUE
Gohir.A01G185900	AT1G68330			TRUE	TRUE																											TRUE			TRUE						TRUE			TRUE
Gohir.A01G186000	AT5G07900		Mitochondrial transcription termination factor family protein																													TRUE			TRUE						TRUE			TRUE
Gohir.A01G186100	AT1G35910		Haloacid dehalogenase-like hydrolase (HAD) superfamily protein		TRUE																											TRUE			TRUE						TRUE			TRUE
Gohir.A01G186200	AT1G78060		Glycosyl hydrolase family protein	TRUE	TRUE																											TRUE			TRUE						TRUE			TRUE
Gohir.A01G186300					TRUE																											TRUE			TRUE						TRUE			TRUE
Gohir.A01G186400	AT1G53710		Calcineurin-like metallo-phosphoesterase superfamily protein																													TRUE			TRUE						TRUE			TRUE
Gohir.A01G186500	AT1G51590	MANIB,MNS1	alpha-mannosidase 1																													TRUE			TRUE						TRUE			TRUE
Gohir.A01G186600	AT1G36160	ACC1,AT-ACC1,EMB22,GK,PAS3	acetyl-CoA carboxylase 1	TRUE	TRUE	TRUE																										TRUE			TRUE						TRUE			TRUE
Gohir.A01G186700	AT5G20950		Glycosyl hydrolase family protein	TRUE	TRUE																											TRUE			TRUE						TRUE			TRUE
Gohir.A01G186800	AT4G08570		Heavy metal transport/detoxification superfamily protein		TRUE																											TRUE			TRUE						TRUE			TRUE
Gohir.A01G186900	AT4G08550		electron carriers;protein disulfide oxidoreductases																													TRUE			TRUE						TRUE			TRUE
Gohir.A01G187000				TRUE	TRUE																											TRUE			TRUE						TRUE			TRUE
Gohir.A01G187100	AT1G77920		bZIP transcription factor family protein	TRUE	TRUE																											TRUE			TRUE						TRUE			TRUE
Gohir.A01G187200	AT1G77930		Chaperone DnaJ-domain superfamily protein		TRUE																											TRUE			TRUE						TRUE			TRUE
Gohir.A01G187300	AT1G12350	ATCOAB,COAB	4-phospho-panto-thenoylcysteine synthetase	TRUE	TRUE																											TRUE			TRUE						TRUE			TRUE
Gohir.A01G187400	AT1G36730		Translation initiation factor IF2/IF5	TRUE	TRUE	TRUE																										TRUE			TRUE						TRUE			TRUE
Gohir.A01G187500	AT1G36732	CPuORF19	conserved peptide upstream open reading frame 19																													TRUE			TRUE						TRUE			TRUE
Gohir.A01G187600	AT1G77800		PHD finger family protein	TRUE	TRUE																											TRUE			TRUE						TRUE			TRUE
Gohir.A01G187700	AT1G36980																															TRUE			TRUE						TRUE			TRUE
Gohir.A01G187800	AT1G77765			TRUE	TRUE																											TRUE			TRUE						TRUE			TRUE
Gohir.A01G187900	AT1G37130	ATNR2,B29,CHL3,NIA2,NIA2-1,NR,NR2	nitrate reductase 2	TRUE	TRUE	TRUE																										TRUE			TRUE						TRUE			TRUE
Gohir.A01G188000	AT1G60360		RING/U-box superfamily protein		TRUE																											TRUE			TRUE						TRUE			TRUE
Gohir.A01G188100	AT1G21910		Integrase-type DNA-binding superfamily protein	TRUE	TRUE																											TRUE			TRUE						TRUE			TRUE
Gohir.A01G188200	AT1G44820		Peptidase M20/M25/M40 family protein		TRUE																											TRUE			TRUE						TRUE			TRUE
Gohir.A01G188300	AT4G08300		nodulin MtN21 /EamA-like transporter family protein		TRUE																											TRUE			TRUE						TRUE			TRUE
Gohir.A01G188400	AT4G08300		nodulin MtN21 /EamA-like transporter family protein	TRUE	TRUE																											TRUE			TRUE						TRUE			TRUE
Gohir.A01G188500	AT1G44770				TRUE																											TRUE			TRUE						TRUE			TRUE
Gohir.A01G188600	AT1G76450		Photosystem II reaction center PsbP family protein		TRUE																											TRUE			TRUE						TRUE			TRUE
Gohir.A01G188700	AT1G21880	LYM1	lysm domain GPI-anchored protein 1 precursor																													TRUE			TRUE						TRUE			TRUE
Gohir.A01G188800	AT1G77600		ARM repeat superfamily protein	TRUE	TRUE																											TRUE			TRUE						TRUE			TRUE
Gohir.A01G188900	AT1G21830																															TRUE			TRUE						TRUE			TRUE
Gohir.A01G189000	AT4G08330																															TRUE			TRUE						TRUE			TRUE
Gohir.A01G189100	AT1G44575	NPQ4,PSBS	Chlorophyll A-B binding family protein																													TRUE			TRUE						TRUE			TRUE
Gohir.A01G189200	AT1G21770		Acyl-CoA N-acyltransferases (NAT) superfamily protein																													TRUE			TRUE						TRUE			TRUE
Gohir.A01G189300	AT5G54160	ATOMT1,OMT1	O-methyltransferase 1																													TRUE			TRUE						TRUE			TRUE
Gohir.A01G189400	AT5G54160	ATOMT1,OMT1	O-methyltransferase 1																													TRUE			TRUE						TRUE			TRUE
Gohir.A01G189500	AT1G76340	GONST3	golgi nucleotide sugar transporter 3																													TRUE			TRUE						TRUE			TRUE
Gohir.A01G189600	AT1G21750	ATPDI5,ATPDIL1-1,PDI5,PDIL1-1	PDI-like 1-1																													TRUE			TRUE						TRUE			TRUE
Gohir.A01G189700	AT3G56840		FAD-dependent oxidoreductase family protein	TRUE	TRUE																											TRUE			TRUE						TRUE			TRUE
Gohir.A01G189800	AT5G44600		S-adenosyl-L-methionine-dependent methyltransferases superfamily protein																													TRUE			TRUE						TRUE			TRUE
Gohir.A01G189900	AT1G77120	ADH,ADH1,ATADH,ATADH1	alcohol dehydrogenase 1			TRUE																										TRUE			TRUE						TRUE			TRUE
Gohir.A01G190000					TRUE																											TRUE			TRUE						TRUE			TRUE
Gohir.A01G190100	AT1G21550		Calcium-binding EF-hand family protein																													TRUE			TRUE						TRUE			TRUE
Gohir.A01G190200	AT1G21550		Calcium-binding EF-hand family protein																													TRUE			TRUE						TRUE			TRUE
Gohir.A01G190300	AT5G20240	PI	K-box region and MADS-box transcription factor family protein																													TRUE			TRUE						TRUE			TRUE
Gohir.A01G190400	AT1G77380	AAP3,ATAAP3	amino acid permease 3																													TRUE			TRUE						TRUE			TRUE
Gohir.A01G190500	AT5G10970		C2H2 and C2HC zinc fingers superfamily protein																													TRUE			TRUE						TRUE			TRUE
Gohir.A01G190600	AT3G58040	SINAT2	seven in absentia of Arabidopsis 2		TRUE																											TRUE			TRUE						TRUE			TRUE
Gohir.A01G190700	AT5G06700	TBR	Plant protein of unknown function (DUF828)	TRUE	TRUE																											TRUE			TRUE						TRUE			TRUE
Gohir.A01G190800	AT2G42810	PAPP5,PP5,PP5.2	protein phosphatase 5.2																													TRUE			TRUE						TRUE			TRUE
Gohir.A01G190900																																TRUE			TRUE						TRUE			TRUE
Gohir.A01G191000	AT5G06740		Concanavalin A-like lectin protein kinase family protein	TRUE	TRUE																											TRUE			TRUE						TRUE			TRUE
Gohir.A01G191100	AT5G06740		Concanavalin A-like lectin protein kinase family protein	TRUE	TRUE																											TRUE			TRUE						TRUE			TRUE
Gohir.A01G191200	AT3G12100		Cation efflux family protein		TRUE																											TRUE			TRUE						TRUE			TRUE
Gohir.A01G191300	AT2G42110																															TRUE			TRUE						TRUE			TRUE
Gohir.A01G191400	AT2G42140		VQ motif-containing protein																													TRUE			TRUE						TRUE			TRUE
Gohir.A01G191500	AT5G06760	LEA4-5	Late Embryogenesis Abundant 4-5																													TRUE			TRUE						TRUE			TRUE
Gohir.A01G191600	AT1G77380	AAP3,ATAAP3	amino acid permease 3																													TRUE			TRUE						TRUE			TRUE
Gohir.A01G191700	AT5G06760	LEA4-5	Late Embryogenesis Abundant 4-5		TRUE																											TRUE			TRUE						TRUE			TRUE
Gohir.A01G191800	AT5G06770		KH domain-containing protein / zinc finger (CCCH type) family protein	TRUE	TRUE																											TRUE			TRUE						TRUE			TRUE
Gohir.A01G191900	AT2G42220		Rhodanese/Cell cycle control phosphatase superfamily protein																													TRUE			TRUE						TRUE			TRUE
Gohir.A01G192000	AT2G42210	ATOEP16-3,OEP16-3	Mitochondrial import inner membrane translocase subunit Tim17/Tim22/Tim23 family protein		TRUE																											TRUE			TRUE						TRUE			TRUE
Gohir.A01G192100	AT3G57930			TRUE	TRUE																											TRUE			TRUE						TRUE			TRUE
Gohir.A01G192200	AT5G06810		Mitochondrial transcription termination factor family protein	TRUE	TRUE																											TRUE			TRUE						TRUE			TRUE
Gohir.A01G192300	AT5G06790																															TRUE			TRUE						TRUE			TRUE
Gohir.A01G192400	AT3G56940	ACSF,CHL27,CRD1	dicarboxylate diiron protein, putative (Crd1)																													TRUE			TRUE						TRUE			TRUE
Gohir.A01G192500	AT3G10740	ARAF,ARAF1,ASD1,ATASD1	alpha-L-arabinofuranosidase 1																													TRUE			TRUE						TRUE			TRUE
Gohir.A01G192600	AT3G10310		P-loop nucleoside triphosphate hydrolases superfamily protein with CH (Calponin Homology) domain																													TRUE			TRUE						TRUE			TRUE
Gohir.A01G192700	AT2G41670		P-loop containing nucleoside triphosphate hydrolases superfamily protein																													TRUE			TRUE						TRUE			TRUE
Gohir.A01G192800	AT3G56910	PSRP5	plastid-specific 50S ribosomal protein 5																													TRUE			TRUE						TRUE			TRUE
Gohir.A01G192900	AT2G41010	ATCAMBP25,CAMBP25	calmodulin (CAM)-binding protein of 25 kDa	TRUE	TRUE																											TRUE			TRUE						TRUE			TRUE
Gohir.A01G193000	AT5G05070		DHHC-type zinc finger family protein																													TRUE			TRUE						TRUE			TRUE
Gohir.A01G193100	AT2G41210	PIP5K5	phosphatidylinositol- 4-phosphate 5-kinase 5																													TRUE			TRUE						TRUE			TRUE
Gohir.A01G193200	AT5G04140	FD-GOGAT,GLS1,GLU1,GLUS	glutamate synthase 1	TRUE	TRUE																											TRUE			TRUE						TRUE			TRUE
Gohir.A01G193300	AT2G41370	BOP2	Ankyrin repeat family protein / BTB/POZ domain-containing protein																													TRUE			TRUE						TRUE			TRUE
Gohir.A01G193400																																TRUE			TRUE						TRUE			TRUE
Gohir.A01G193500	AT2G41410		Calcium-binding EF-hand family protein		TRUE																											TRUE			TRUE						TRUE			TRUE
Gohir.A01G193600					TRUE																											TRUE			TRUE						TRUE			TRUE
Gohir.A01G193700	AT5G04010		F-box family protein	TRUE	TRUE																											TRUE			TRUE						TRUE			TRUE
Gohir.A01G193800	AT2G41530	ATSFGH,SFGH	S-formylglutathione hydrolase	TRUE	TRUE																											TRUE			TRUE						TRUE			TRUE
Gohir.A01G193900	AT1G52970	DD11	downregulated in DIF1 11																													TRUE			TRUE						TRUE			TRUE
Gohir.A01G194000	AT3G57360				TRUE																											TRUE			TRUE						TRUE			TRUE
Gohir.A01G194100	AT2G31750	UGT74D1	UDP-glucosyl transferase 74D1	TRUE	TRUE																											TRUE			TRUE						TRUE			TRUE
Gohir.A01G194200	AT2G41290	SSL2	strictosidine synthase-like 2	TRUE	TRUE																											TRUE			TRUE						TRUE			TRUE
Gohir.A01G194300					TRUE																											TRUE			TRUE						TRUE			TRUE
Gohir.A01G194400																																TRUE			TRUE						TRUE			TRUE
Gohir.A01G194500	AT3G57890		Tubulin binding cofactor C domain-containing protein		TRUE																											TRUE			TRUE						TRUE			TRUE
Gohir.A01G194600	AT5G06839	bZIP65,TGA10	bZIP transcription factor family protein																													TRUE			TRUE						TRUE			TRUE
Gohir.A01G194700	AT1G74050		Ribosomal protein L6 family protein																													TRUE			TRUE						TRUE			TRUE
Gohir.A01G194800	AT3G12150				TRUE																											TRUE			TRUE						TRUE			TRUE
Gohir.A01G194900	AT5G06900	CYP93D1	cytochrome P450, family 93, subfamily D, polypeptide 1	TRUE	TRUE																											TRUE			TRUE						TRUE			TRUE
Gohir.A01G195000	AT5G06900	CYP93D1	cytochrome P450, family 93, subfamily D, polypeptide 1			TRUE																										TRUE			TRUE						TRUE			TRUE
Gohir.A01G195100	AT2G42250	CYP712A1	cytochrome P450, family 712, subfamily A, polypeptide 1																													TRUE			TRUE						TRUE			TRUE
Gohir.A01G195200	AT2G42280		basic helix-loop-helix (bHLH) DNA-binding superfamily protein	TRUE	TRUE																											TRUE			TRUE						TRUE			TRUE
Gohir.A01G195300	AT3G57800		basic helix-loop-helix (bHLH) DNA-binding superfamily protein																													TRUE			TRUE						TRUE			TRUE
Gohir.A01G195400	AT1G51200		A20/AN1-like zinc finger family protein																													TRUE			TRUE						TRUE			TRUE
Gohir.A01G195500	AT3G12170		Chaperone DnaJ-domain superfamily protein	TRUE	TRUE																											TRUE			TRUE						TRUE			TRUE
Gohir.A01G195600	AT3G20860	ATNEK5,NEK5	NIMA-related kinase 5																													TRUE			TRUE						TRUE			TRUE
Gohir.A01G195700	AT2G41905																															TRUE			TRUE						TRUE			TRUE
Gohir.A01G195800	AT2G41905																															TRUE			TRUE						TRUE			TRUE
Gohir.A01G195900	AT2G41905																															TRUE			TRUE						TRUE			TRUE
Gohir.A01G196000	AT3G57680		Peptidase S41 family protein	TRUE	TRUE																											TRUE			TRUE						TRUE			TRUE
Gohir.A01G196100	AT5G61240		Leucine-rich repeat (LRR) family protein		TRUE																											TRUE			TRUE						TRUE			TRUE
Gohir.A01G196200	AT3G18140		Transducin/WD40 repeat-like superfamily protein		TRUE																											TRUE			TRUE						TRUE			TRUE
Gohir.A01G196300	AT3G57650	LPAT2	lysophosphatidyl acyltransferase 2	TRUE	TRUE																											TRUE			TRUE						TRUE			TRUE
Gohir.A01G196400	AT3G52105																															TRUE			TRUE						TRUE			TRUE
Gohir.A01G196500	AT3G57570		ARM repeat superfamily protein																													TRUE			TRUE						TRUE			TRUE
Gohir.A01G196600	AT5G52630	MEF1	mitochondrial RNAediting factor 1																													TRUE			TRUE						TRUE			TRUE
Gohir.A01G196700	AT1G51340		MATE efflux family protein																													TRUE			TRUE						TRUE			TRUE
Gohir.A01G196800	AT2G41835		zinc finger (C2H2 type, AN1-like) family protein																													TRUE			TRUE						TRUE			TRUE
Gohir.A01G196900	AT2G41830		Uncharacterized protein	TRUE	TRUE																											TRUE			TRUE						TRUE			TRUE
Gohir.A01G197000	AT1G01170		Protein of unknown function (DUF1138)																													TRUE			TRUE						TRUE			TRUE
Gohir.A01G197100	AT2G41740	ATVLN2,VLN2	villin 2		TRUE	TRUE																										TRUE			TRUE						TRUE			TRUE
Gohir.A01G197200	AT3G10760		Homeodomain-like superfamily protein		TRUE																											TRUE			TRUE						TRUE			TRUE
Gohir.A01G197300	AT2G40890	CYP98A3	cytochrome P450, family 98, subfamily A, polypeptide 3																													TRUE			TRUE						TRUE			TRUE
Gohir.A01G197400	AT2G41120																															TRUE			TRUE						TRUE			TRUE
Gohir.A01G197500	AT1G76730		NagB/RpiA/CoA transferase-like superfamily protein																													TRUE			TRUE						TRUE			TRUE
Gohir.A01G197600	AT4G24380					TRUE																										TRUE			TRUE						TRUE			TRUE
Gohir.A01G197700	AT1G43710	emb1075	Pyridoxal phosphate (PLP)-dependent transferases superfamily protein																													TRUE			TRUE						TRUE			TRUE
Gohir.A01G197800	AT1G21200		sequence-specific DNA binding transcription factors																													TRUE			TRUE						TRUE			TRUE
Gohir.A01G197900	AT1G76880		Duplicated homeodomain-like superfamily protein																													TRUE			TRUE						TRUE			TRUE
Gohir.A01G198000	AT1G68540		NAD(P)-binding Rossmann-fold superfamily protein		TRUE																											TRUE			TRUE						TRUE			TRUE
Gohir.A01G198100	AT2G19160		Core-2/I-branching beta-1,6-N-acetylglucosaminyltransferase family protein																													TRUE			TRUE						TRUE			TRUE
Gohir.A01G198200	AT3G01800		Ribosome recycling factor		TRUE																											TRUE			TRUE						TRUE			TRUE
Gohir.A01G198300	AT1G09690		Translation protein SH3-like family protein																													TRUE			TRUE						TRUE			TRUE
Gohir.A01G198400	AT3G58560		DNAse I-like superfamily protein	TRUE	TRUE																											TRUE			TRUE						TRUE			TRUE
Gohir.A01G198500	AT2G42520		P-loop containing nucleoside triphosphate hydrolases superfamily protein	TRUE	TRUE																											TRUE			TRUE						TRUE			TRUE
Gohir.A01G198600	AT3G58500	PP2A-4	protein phosphatase 2A-4		TRUE	TRUE																										TRUE			TRUE						TRUE			TRUE
Gohir.A01G198700	AT2G44310		Calcium-binding EF-hand family protein	TRUE	TRUE																											TRUE			TRUE						TRUE			TRUE
Gohir.A01G198800	AT3G58480		calmodulin-binding family protein	TRUE	TRUE																											TRUE			TRUE						TRUE			TRUE
Gohir.A01G198900	AT3G11940	AML1,ATRPS5A,RPS5A	ribosomal protein 5A																													TRUE			TRUE						TRUE			TRUE
Gohir.A01G199000	AT5G06600	UBP12	ubiquitin-specific protease 12	TRUE	TRUE																											TRUE			TRUE						TRUE			TRUE
Gohir.A01G199100	AT5G27740	EMB161,EMB251,EMB2775,RFC3	ATPase family associated with various cellular activities (AAA)																													TRUE			TRUE						TRUE			TRUE
Gohir.A01G199200	AT3G11890		Sterile alpha motif (SAM) domain-containing protein	TRUE	TRUE																											TRUE			TRUE						TRUE			TRUE
Gohir.A01G199300	AT3G11900	ANT1	aromatic and neutral transporter 1																													TRUE			TRUE						TRUE			TRUE
Gohir.A01G199400	AT5G06560		Protein of unknown function, DUF593		TRUE																											TRUE			TRUE						TRUE			TRUE
Gohir.A01G199500	AT3G54750			TRUE	TRUE																											TRUE			TRUE						TRUE			TRUE
Gohir.A01G199600	AT3G01360		Family of unknown function (DUF716)																													TRUE			TRUE						TRUE			TRUE
Gohir.A01G199700	AT5G06530		ABC-2 type transporter family protein	TRUE	TRUE																											TRUE			TRUE						TRUE			TRUE
Gohir.A01G199800	AT3G11690																															TRUE			TRUE						TRUE			TRUE
Gohir.A01G199900	AT2G35880		TPX2 (targeting protein for Xklp2) protein family																													TRUE			TRUE						TRUE			TRUE
Gohir.A01G200000	AT2G35900			TRUE	TRUE																											TRUE			TRUE						TRUE			TRUE
Gohir.A01G200100	AT5G06410		DNAJ heat shock N-terminal domain-containing protein	TRUE	TRUE																											TRUE			TRUE						TRUE			TRUE
Gohir.A01G200200	AT4G28360		Ribosomal protein L22p/L17e family protein																													TRUE			TRUE						TRUE			TRUE
Gohir.A01G200300	AT3G11760			TRUE	TRUE																											TRUE			TRUE						TRUE			TRUE
Gohir.A01G200400	AT3G44150				TRUE																											TRUE			TRUE						TRUE			TRUE
Gohir.A01G200500				TRUE	TRUE																											TRUE			TRUE						TRUE			TRUE
Gohir.A01G200600	AT5G06510	NF-YA10	nuclear factor Y, subunit A10	TRUE	TRUE		TRUE																									TRUE			TRUE						TRUE			TRUE
Gohir.A01G200700	AT1G74360		Leucine-rich repeat protein kinase family protein	TRUE	TRUE																											TRUE			TRUE						TRUE			TRUE
Gohir.A01G200800	AT5G23960	ATTPS21,TPS21	terpene synthase 21	TRUE	TRUE																											TRUE			TRUE						TRUE			TRUE
Gohir.A01G200900	AT5G23960	ATTPS21,TPS21	terpene synthase 21	TRUE	TRUE																											TRUE			TRUE						TRUE			TRUE
Gohir.A01G201000	AT3G52440		Dof-type zinc finger DNA-binding family protein	TRUE	TRUE																											TRUE			TRUE						TRUE			TRUE
Gohir.A01G201100	AT2G35930	PUB23	plant U-box 23		TRUE																											TRUE			TRUE						TRUE			TRUE
Gohir.A01G201200	AT2G35940	BLH1,EDA29	BEL1-like homeodomain 1	TRUE	TRUE																											TRUE			TRUE						TRUE			TRUE
Gohir.A01G201300	AT3G11670	DGD1	UDP-Glycosyltransferase superfamily protein	TRUE	TRUE																											TRUE			TRUE						TRUE			TRUE
Gohir.A01G201400	AT5G06360		Ribosomal protein S8e family protein																													TRUE			TRUE						TRUE			TRUE
Gohir.A01G201500	AT2G01820		Leucine-rich repeat protein kinase family protein	TRUE	TRUE																											TRUE			TRUE						TRUE			TRUE
Gohir.A01G201600	AT3G09180																															TRUE			TRUE						TRUE			TRUE
Gohir.A01G201700	AT5G06340	ATNUDX27,NUDX27	nudix hydrolase homolog 27		TRUE																											TRUE			TRUE						TRUE			TRUE
Gohir.A01G201800	AT2G35950	EDA12	embryo sac development arrest 12	TRUE	TRUE																											TRUE			TRUE						TRUE			TRUE
Gohir.A01G201900	AT3G52460		hydroxyproline-rich glycoprotein family protein	TRUE	TRUE																											TRUE			TRUE						TRUE			TRUE
Gohir.A01G202000	AT3G11660	NHL1	NDR1/HIN1-like 1																													TRUE			TRUE						TRUE			TRUE
Gohir.A01G202100	AT2G35980	ATNHL10,NHL10,YLS9	Late embryogenesis abundant (LEA) hydroxyproline-rich glycoprotein family		TRUE																											TRUE			TRUE						TRUE			TRUE
Gohir.A01G202200	AT3G52500		Eukaryotic aspartyl protease family protein	TRUE	TRUE																											TRUE			TRUE						TRUE			TRUE
Gohir.A01G202300	AT5G06300		Putative lysine decarboxylase family protein																													TRUE			TRUE						TRUE			TRUE
Gohir.A01G202400	AT5G06280			TRUE	TRUE																											TRUE			TRUE						TRUE			TRUE
Gohir.A01G202500	AT2G36020	HVA22J	HVA22-like protein J																													TRUE			TRUE						TRUE			TRUE
Gohir.A01G202600	AT2G36026		Ovate family protein		TRUE	TRUE																										TRUE			TRUE						TRUE			TRUE
Gohir.A01G202700	AT5G04820	ATOFP13,OFP13	ovate family protein 13																													TRUE			TRUE						TRUE			TRUE
Gohir.A01G202800	AT3G52560	MMZ4,UEV1D,UEV1D-4	ubiquitin E2 variant 1D-4		TRUE																											TRUE			TRUE						TRUE			TRUE
Gohir.A01G202900	AT3G11600				TRUE																											TRUE			TRUE						TRUE			TRUE
Gohir.A02G031200	AT1G03130	PSAD-2	photosystem I subunit D-2			TRUE																																											TRUE
Gohir.A02G031300	AT3G22400	LOX5	PLAT/LH2 domain-containing lipoxygenase family protein																																														TRUE
Gohir.A02G031400	AT1G03130	PSAD-2	photosystem I subunit D-2			TRUE																																											TRUE
Gohir.A02G031500	AT1G31710		Copper amine oxidase family protein																																														TRUE
Gohir.A02G031600	AT1G05370		Sec14p-like phosphatidylinositol transfer family protein																																														TRUE
Gohir.A02G031700						TRUE																																											TRUE
Gohir.A02G031800	AT3G04910	ATWNK1,WNK1,ZIK4	with no lysine (K) kinase 1	TRUE	TRUE	TRUE																																											TRUE
Gohir.A02G031900	AT2G18570		UDP-Glycosyltransferase superfamily protein		TRUE	TRUE																																											TRUE
Gohir.A02G032000	AT1G54520					TRUE																																											TRUE
Gohir.A02G032100	AT4G14920		Acyl-CoA N-acyltransferase with RING/FYVE/PHD-type zinc finger protein	TRUE	TRUE																																												TRUE
Gohir.A02G032200	AT3G22440		FRIGIDA-like protein	TRUE	TRUE																																												TRUE
Gohir.A02G032300	AT3G22450		Ribosomal L18p/L5e family protein	TRUE	TRUE																																												TRUE
Gohir.A02G032400	AT3G22490		Seed maturation protein	TRUE	TRUE			TRUE																																									TRUE
Gohir.A02G032500					TRUE																																												TRUE
Gohir.A02G032600	AT3G22520																																																TRUE
Gohir.A02G032700	AT3G22630	PBD1,PRCGB	20S proteasome beta subunit D1																																														TRUE
Gohir.A02G032800	AT4G10250	ATHSP22.0	HSP20-like chaperones superfamily protein																																														TRUE
Gohir.A02G032900	AT4G10250	ATHSP22.0	HSP20-like chaperones superfamily protein																																														TRUE
Gohir.A02G033000	AT1G59960		NAD(P)-linked oxidoreductase superfamily protein	TRUE	TRUE	TRUE																																											TRUE
Gohir.A02G033100	AT3G22620		Bifunctional inhibitor/lipid-transfer protein/seed storage 2S albumin superfamily protein																																														TRUE
Gohir.A02G033200	AT2G48130		Bifunctional inhibitor/lipid-transfer protein/seed storage 2S albumin superfamily protein		TRUE																																												TRUE
Gohir.A02G033300	AT3G22600		Bifunctional inhibitor/lipid-transfer protein/seed storage 2S albumin superfamily protein		TRUE	TRUE																																											TRUE
Gohir.A02G033400	AT3G22590	CDC73,PHP	PLANT HOMOLOGOUS TO PARAFIBROMIN		TRUE																																												TRUE
Gohir.A02G033500	AT2G32030		Acyl-CoA N-acyltransferases (NAT) superfamily protein		TRUE																																												TRUE
Gohir.A02G033600	AT3G22740	HMT3	homocysteine S-methyltransferase 3	TRUE	TRUE																																												TRUE
Gohir.A02G033700	AT3G22750		Protein kinase superfamily protein																																														TRUE
Gohir.A02G033800	AT4G14770	ATTCX2,TCX2	TESMIN/TSO1-like CXC 2	TRUE	TRUE																																												TRUE
Gohir.A02G033900	AT4G34670		Ribosomal protein S3Ae																																														TRUE
Gohir.A02G034000	AT3G22810		Plant protein of unknown function (DUF828) with plant pleckstrin homology-like region		TRUE																																												TRUE
Gohir.A02G034100	AT5G62950		RNA polymerase II, Rpb4, core protein		TRUE																																												TRUE
Gohir.A02G034200	AT4G14710	ATARD2	RmlC-like cupins superfamily protein		TRUE																																												TRUE
Gohir.A02G034300	AT1G60680		NAD(P)-linked oxidoreductase superfamily protein																																														TRUE
Gohir.A02G034400	AT1G60690		NAD(P)-linked oxidoreductase superfamily protein	TRUE	TRUE																																												TRUE
Gohir.A02G034500	AT3G22880	ARLIM15,ATDMC1,DMC1	DNA repair (Rad51) family protein				TRUE																																										TRUE
Gohir.A02G034600	AT3G22890	APS1	ATP sulfurylase 1		TRUE																																												TRUE
Gohir.A02G034700				TRUE	TRUE																																												TRUE
Gohir.A02G034800	AT4G14640	CAM8	calmodulin 8		TRUE																																												TRUE
Gohir.A02G034900	AT3G63410	APG1,E37,IEP37,VTE3	S-adenosyl-L-methionine-dependent methyltransferases superfamily protein	TRUE	TRUE																																												TRUE
Gohir.A02G035000	AT4G14615																																																TRUE
Gohir.A02G035100	AT3G23000	ATSR2,ATSRPK1,CIPK7,PKS7,SnRK3.10	CBL-interacting protein kinase 7																																														TRUE
Gohir.A02G035200	AT5G43700	ATAUX2-11,IAA4	AUX/IAA transcriptional regulator family protein		TRUE																																												TRUE
Gohir.A02G035300	AT4G14550	IAA14,SLR	indole-3-acetic acid inducible 14																																														TRUE
Gohir.A02G035400	AT5G43680			TRUE	TRUE																																												TRUE
Gohir.A02G035500	AT5G43650	BHLH92	basic helix-loop-helix (bHLH) DNA-binding superfamily protein																																														TRUE
Gohir.A02G035600	AT1G04270	RPS15	cytosolic ribosomal protein S15																																														TRUE
Gohir.A02G035700	AT2G34160		Alba DNA/RNA-binding protein																																														TRUE
Gohir.A02G035800	AT1G12300		Tetratricopeptide repeat (TPR)-like superfamily protein																																														TRUE
Gohir.A02G035900																																																	TRUE
Gohir.A02G036000						TRUE																																											TRUE
Gohir.A02G036100																																																	TRUE
Gohir.A02G036200	AT3G02400		SMAD/FHA domain-containing protein																																														TRUE
Gohir.A02G036300																																																	TRUE
Gohir.A02G036400	AT1G04300		TRAF-like superfamily protein																																														TRUE
Gohir.A02G036500																																																	TRUE
Gohir.A02G036600	AT5G11200		DEAD/DEAH box RNA helicase family protein																																														TRUE
Gohir.A02G036700																																																	TRUE
Gohir.A02G036800	AT4G24000	ATCSLG2,CSLG2	cellulose synthase like G2																																														TRUE
Gohir.A02G036900	AT3G23130	FLO10,FON1,SUP	C2H2 and C2HC zinc fingers superfamily protein																																														TRUE
Gohir.A02G037000	AT3G04580	EIN4	Signal transduction histidine kinase, hybrid-type, ethylene sensor	TRUE	TRUE	TRUE																																											TRUE
Gohir.A02G037100	AT4G14450				TRUE																																												TRUE
Gohir.A02G037200	AT5G22355		Cysteine/Histidine-rich C1 domain family protein																																														TRUE
Gohir.A02G037300	AT4G14440	ATECI3,ECI3,HCD1	3-hydroxyacyl-CoA dehydratase 1		TRUE																																												TRUE
Gohir.A02G037400	AT4G14420		HR-like lesion-inducing protein-related		TRUE																																												TRUE
Gohir.A02G037500	AT1G06620		2-oxoglutarate (2OG) and Fe(II)-dependent oxygenase superfamily protein																																														TRUE
Gohir.A02G037600	AT1G06620		2-oxoglutarate (2OG) and Fe(II)-dependent oxygenase superfamily protein	TRUE	TRUE																																												TRUE
Gohir.A02G037700	AT1G06620		2-oxoglutarate (2OG) and Fe(II)-dependent oxygenase superfamily protein																																														TRUE
Gohir.A02G037800	AT5G59540		2-oxoglutarate (2OG) and Fe(II)-dependent oxygenase superfamily protein																																														TRUE
Gohir.A02G037900	AT1G06620		2-oxoglutarate (2OG) and Fe(II)-dependent oxygenase superfamily protein																																														TRUE
Gohir.A02G038000	AT1G06620		2-oxoglutarate (2OG) and Fe(II)-dependent oxygenase superfamily protein		TRUE																																												TRUE
Gohir.A02G038100	AT3G23200		Uncharacterised protein family (UPF0497)																																														TRUE
Gohir.A02G038200	AT4G08300		nodulin MtN21 /EamA-like transporter family protein																																														TRUE
Gohir.A02G038300	AT5G43420		RING/U-box superfamily protein																																														TRUE
Gohir.A02G038400				TRUE	TRUE																																												TRUE
Gohir.A02G038500																																																	TRUE
Gohir.A02G038600					TRUE																																												TRUE
Gohir.A02G038700																																																	TRUE
Gohir.A02G038800				TRUE	TRUE																																												TRUE
Gohir.A02G038900				TRUE	TRUE																																												TRUE
Gohir.A02G039000				TRUE	TRUE																																												TRUE
Gohir.A02G039100	AT5G43380	TOPP6	type one serine/threonine protein phosphatase 6		TRUE																																												TRUE
Gohir.A02G039200	AT1G04400	AT-PHH1,ATCRY2,CRY2,FHA,PHH1	cryptochrome 2	TRUE	TRUE	TRUE																																											TRUE
Gohir.A02G039300	AT4G14385																																																TRUE
Gohir.A02G039400	AT1G04410		Lactate/malate dehydrogenase family protein		TRUE																																												TRUE
Gohir.A02G039500	AT1G65660	SMP1	Pre-mRNA splicing Prp18-interacting factor																																														TRUE
Gohir.A02G039600	AT1G04430		S-adenosyl-L-methionine-dependent methyltransferases superfamily protein																																														TRUE
Gohir.A02G039700	AT4G14350		AGC (cAMP-dependent cGMP-dependent and protein kinase C) kinase family protein		TRUE																																												TRUE
Gohir.A02G039800	AT4G14340	CKI1,CKL11	casein kinase I	TRUE	TRUE																																												TRUE
Gohir.A02G039900	AT4G27500	PPI1	proton pump interactor 1		TRUE																																												TRUE
Gohir.A02G040000	AT5G43310		COP1-interacting protein-related	TRUE	TRUE																																												TRUE
Gohir.A02G040100	AT4G27090		Ribosomal protein L14		TRUE																																												TRUE
Gohir.A02G040200	AT2G33470	ATGLTP1,GLTP1	glycolipid transfer protein 1		TRUE																																												TRUE
Gohir.A02G040300	AT4G14330		P-loop containing nucleoside triphosphate hydrolases superfamily protein																																														TRUE
Gohir.A02G040400	AT5G45170		Haloacid dehalogenase-like hydrolase (HAD) superfamily protein		TRUE																																												TRUE
Gohir.A02G040500	AT4G14310		Transducin/WD40 repeat-like superfamily protein	TRUE	TRUE																																												TRUE
Gohir.A02G040600	AT3G23430	ATPHO1,PHO1	phosphate 1		TRUE																																												TRUE
Gohir.A02G040700	AT2G33470	ATGLTP1,GLTP1	glycolipid transfer protein 1																																														TRUE
Gohir.A02G040800	AT4G14330		P-loop containing nucleoside triphosphate hydrolases superfamily protein																																														TRUE
Gohir.A02G040900	AT3G23440	EDA6,MEE37	embryo sac development arrest 6																																														TRUE
Gohir.A02G041000	AT3G23450																																																TRUE
Gohir.A02G041100	AT4G28600	NPGR2	no pollen germination related 2																																														TRUE
Gohir.A02G041200	AT2G33450		Ribosomal L28 family		TRUE																																												TRUE
Gohir.A02G041300	AT2G33430	DAL,DAL1	differentiation and greening-like 1																																														TRUE
Gohir.A02G041400	AT3G23490	CYN	cyanase	TRUE	TRUE																																												TRUE
Gohir.A02G041500																																																	TRUE
Gohir.A02G041600	AT5G46050	ATPTR3,PTR3	peptide transporter 3	TRUE	TRUE																																												TRUE
Gohir.A02G041700	AT2G33420		Protein of unknown function (DUF810)	TRUE	TRUE																																												TRUE
Gohir.A02G041800	AT2G33410		RNA-binding (RRM/RBD/RNP motifs) family protein		TRUE																																												TRUE
Gohir.A02G041900	AT3G23510		Cyclopropane-fatty-acyl-phospholipid synthase	TRUE	TRUE																																												TRUE
Gohir.A02G042000	AT3G23530		Cyclopropane-fatty-acyl-phospholipid synthase	TRUE	TRUE																																												TRUE
Gohir.A02G042100	AT2G33410		RNA-binding (RRM/RBD/RNP motifs) family protein		TRUE																																												TRUE
Gohir.A02G042200	AT2G33390																																																TRUE
Gohir.A02G042300	AT5G35620	EIF(ISO)4E,EIF4E2,eIFiso4E,LSP,LSP1	Eukaryotic initiation factor 4E protein			TRUE																																											TRUE
Gohir.A02G042400	AT2G33370		Ribosomal protein L14p/L23e family protein																																														TRUE
Gohir.A02G042500	AT2G33360		Protein of unknown function (DUF3527)		TRUE																																												TRUE
Gohir.A02G042600	AT1G04500		CCT motif family protein																																														TRUE
Gohir.A02G042700	AT1G04510	MAC3A	MOS4-associated complex 3A																																														TRUE
Gohir.A02G042800	AT2G05590		TLD-domain containing nucleolar protein																																														TRUE
Gohir.A02G042900	AT2G03880		Pentatricopeptide repeat (PPR) superfamily protein	TRUE	TRUE																																												TRUE
Gohir.A02G043000	AT4G21865			TRUE	TRUE																																												TRUE
Gohir.A02G043100	AT1G60000		RNA-binding (RRM/RBD/RNP motifs) family protein																																														TRUE
Gohir.A02G043200	AT5G43960		Nuclear transport factor 2 (NTF2) family protein with RNA binding (RRM-RBD-RNP motifs) domain		TRUE																																												TRUE
Gohir.A02G043300	AT1G04540		Calcium-dependent lipid-binding (CaLB domain) family protein																																														TRUE
Gohir.A02G043400	AT1G04540		Calcium-dependent lipid-binding (CaLB domain) family protein		TRUE																																												TRUE
Gohir.A02G043500	AT4G13450		Adenine nucleotide alpha hydrolases-like superfamily protein																																														TRUE
Gohir.A02G043600	AT3G24315	AtSec20	Sec20 family protein																																														TRUE
Gohir.A02G043700	AT2G36690		2-oxoglutarate (2OG) and Fe(II)-dependent oxygenase superfamily protein																																														TRUE
Gohir.A02G043800	AT4G13480	AtMYB79,MYB79	myb domain protein 79		TRUE																																												TRUE
Gohir.A02G043900	AT3G12770	MEF22	mitochondrial editing factor 22	TRUE	TRUE																																												TRUE
Gohir.A02G044000	AT4G13510	AMT1;1,ATAMT1,ATAMT1;1	ammonium transporter 1;1	TRUE	TRUE																																												TRUE
Gohir.A02G044100																																																	TRUE
Gohir.A02G044200	AT5G24030	SLAH3	SLAC1 homologue 3			TRUE																																											TRUE
Gohir.A02G044300	AT4G13520	SMAP1	small acidic protein 1																																														TRUE
Gohir.A02G044400	AT4G15470		Bax inhibitor-1 family protein																																														TRUE
Gohir.A02G044500	AT4G13110		BSD domain-containing protein																																														TRUE
Gohir.A02G044600	AT5G18930	BUD2,SAMDC4	Adenosylmethionine decarboxylase family protein	TRUE	TRUE																																												TRUE
Gohir.A02G044700	AT3G06270		Protein phosphatase 2C family protein																																														TRUE
Gohir.A02G044800	AT4G03000		RING/U-box superfamily protein																																														TRUE
Gohir.A02G044900	AT4G15545				TRUE																																												TRUE
Gohir.A02G045000	AT5G18860		inosine-uridine preferring nucleoside hydrolase family protein	TRUE	TRUE																																												TRUE
Gohir.A02G045100	AT5G18840		Major facilitator superfamily protein	TRUE	TRUE																																												TRUE
Gohir.A02G045200	AT5G18830	ATSPL7,SPL7	squamosa promoter binding protein-like 7	TRUE	TRUE																																												TRUE
Gohir.A02G045300																																																	TRUE
Gohir.A02G045400	AT3G62450																																																TRUE
Gohir.A02G045500	AT3G21480		BRCT domain-containing DNA repair protein	TRUE	TRUE																																												TRUE
Gohir.A02G045600	AT5G18750		DNAJ heat shock N-terminal domain-containing protein	TRUE	TRUE																																												TRUE
Gohir.A02G045700	AT5G18700	EMB3013,RUK	Protein kinase family protein with ARM repeat domain	TRUE	TRUE																																												TRUE
Gohir.A02G045800	AT3G05030	ATNHX2,NHX2	sodium hydrogen exchanger 2																																														TRUE
Gohir.A02G045900																																																	TRUE
Gohir.A02G046000																																																	TRUE
Gohir.A02G046100	AT1G40087		Plant transposase (Ptta/En/Spm family)																																														TRUE
Gohir.A02G046200	AT2G47900	AtTLP3,TLP3	tubby like protein 3		TRUE																																												TRUE
Gohir.A02G046300	AT5G18670	BAM9,BMY3	beta-amylase 3	TRUE	TRUE																																												TRUE
Gohir.A02G046400	AT4G15610		Uncharacterised protein family (UPF0497)																																														TRUE
Gohir.A02G046500	AT4G15630		Uncharacterised protein family (UPF0497)																																														TRUE
Gohir.A02G046600	AT5G18650		CHY-type/CTCHY-type/RING-type Zinc finger protein			TRUE																																											TRUE
Gohir.A02G046700	AT5G18640		alpha/beta-Hydrolases superfamily protein																																														TRUE
Gohir.A02G046800	AT1G19910	ATVHA-C2,AVA-2PE,AVA-P2	ATPase F0/V0 complex subunit C protein		TRUE																																												TRUE
Gohir.A02G046900	AT2G16530		3-oxo-5-alpha-steroid 4-dehydrogenase family protein																																														TRUE
Gohir.A02G047000	AT2G21240	ATBPC4,BBR,BPC4	basic pentacysteine 4		TRUE																																												TRUE
Gohir.A02G047100	AT1G04570		Major facilitator superfamily protein																																														TRUE
Gohir.A02G047200	AT3G12770	MEF22	mitochondrial editing factor 22	TRUE	TRUE																																												TRUE
Gohir.A02G047300	AT3G06400	CHR11	chromatin-remodeling protein 11	TRUE	TRUE																																												TRUE
Gohir.A02G047400	AT3G21460		Glutaredoxin family protein																																														TRUE
Gohir.A02G047500	AT5G18600		Thioredoxin superfamily protein	TRUE	TRUE																																												TRUE
Gohir.A02G047600	AT5G18560	PUCHI	Integrase-type DNA-binding superfamily protein																																														TRUE
Gohir.A02G047700	AT5G18550		Zinc finger C-x8-C-x5-C-x3-H type family protein	TRUE	TRUE																																												TRUE
Gohir.A02G047800																																																	TRUE
Gohir.A02G047900	AT3G21430	ALY3,ATALY3	DNA binding	TRUE	TRUE																																												TRUE
Gohir.A02G048000	AT5G07900		Mitochondrial transcription termination factor family protein																																														TRUE
Gohir.A02G048100	AT5G07900		Mitochondrial transcription termination factor family protein	TRUE	TRUE																																												TRUE
Gohir.A02G048200	AT5G18540				TRUE																																												TRUE
Gohir.A02G048300	AT1G09020	ATSNF4,SNF4	homolog of yeast sucrose nonfermenting 4		TRUE																																												TRUE
Gohir.A02G048400	AT4G15730		CW-type Zinc Finger	TRUE	TRUE																																												TRUE
Gohir.A02G048500	AT4G02570	ATCUL1,AXR6,CUL1	cullin 1																																														TRUE
Gohir.A02G048600																																																	TRUE
Gohir.A02G048700	AT2G47810	NF-YB5	nuclear factor Y subunit B5		TRUE																																												TRUE
Gohir.A02G048800	AT3G21400				TRUE																																												TRUE
Gohir.A02G048900	AT5G48970		Mitochondrial substrate carrier family protein	TRUE	TRUE																																												TRUE
Gohir.A02G049000				TRUE	TRUE																																												TRUE
Gohir.A02G049100					TRUE																																												TRUE
Gohir.A02G049200	AT4G15800	RALFL33	ralf-like 33																																														TRUE
Gohir.A02G049300	AT4G15802	AtHSBP,HSBP	heat shock factor binding protein		TRUE																																												TRUE
Gohir.A02G049400	AT3G62720	ATXT1,XT1,XXT1	xylosyltransferase 1	TRUE	TRUE																																												TRUE
Gohir.A02G049500	AT4G15830		ARM repeat superfamily protein	TRUE	TRUE																																												TRUE
Gohir.A02G049600	AT4G15840		BTB/POZ domain-containing protein	TRUE	TRUE																																												TRUE
Gohir.A02G049700	AT3G16640	TCTP	translationally controlled tumor protein																																														TRUE
Gohir.A02G049800	AT5G49060		Heat shock protein DnaJ N-terminal with domain of unknown function (DUF1977)																																														TRUE
Gohir.A02G049900	AT4G15900	PRL1	pleiotropic regulatory locus 1																																														TRUE
Gohir.A02G050000	AT3G62830	ATUXS2,AUD1,UXS2	NAD(P)-binding Rossmann-fold superfamily protein																																														TRUE
Gohir.A02G050100	AT4G15920		Nodulin MtN3 family protein																																														TRUE
Gohir.A02G050200	AT4G15930		Dynein light chain type 1 family protein																																														TRUE
Gohir.A02G050300	AT5G49120		Protein of unknown function (DUF581)																																														TRUE
Gohir.A02G050400	AT5G49130		MATE efflux family protein																																														TRUE
Gohir.A02G050500					TRUE																																												TRUE
Gohir.A02G050600	AT5G49150	ATGEX2,GEX2	gamete expressed 2	TRUE	TRUE																																												TRUE
Gohir.A02G050700	AT3G06840				TRUE																																												TRUE
Gohir.A02G050800	AT3G16730																																																TRUE
Gohir.A02G050900	AT5G27870		Plant invertase/pectin methylesterase inhibitor superfamily	TRUE	TRUE																																												TRUE
Gohir.A02G051000	AT3G06810	IBR3	acyl-CoA dehydrogenase-related	TRUE	TRUE																																												TRUE
Gohir.A02G051100	AT1G02790	PGA4	polygalacturonase 4	TRUE	TRUE																																												TRUE
Gohir.A02G051200	AT3G16780		Ribosomal protein L19e family protein		TRUE																																												TRUE
Gohir.A02G051300	AT3G16785	PLD ZETA 1,PLDP1,PLDZ1,PLDZETA1	phospholipase D P1	TRUE	TRUE																																												TRUE
Gohir.A02G051400	AT3G05640		Protein phosphatase 2C family protein	TRUE	TRUE																																												TRUE
Gohir.A02G051500	AT1G06330		Heavy metal transport/detoxification superfamily protein	TRUE	TRUE																																												TRUE
Gohir.A02G051600	AT1G66070		Translation initiation factor eIF3 subunit		TRUE																																												TRUE
Gohir.A02G051700	AT1G24020	MLP423	MLP-like protein 423																																														TRUE
Gohir.A02G051800	AT1G24020	MLP423	MLP-like protein 423		TRUE																																												TRUE
Gohir.A02G051900	AT1G24020	MLP423	MLP-like protein 423																																														TRUE
Gohir.A02G052000	AT1G24020	MLP423	MLP-like protein 423	TRUE	TRUE																																												TRUE
Gohir.A02G052100	AT1G24020	MLP423	MLP-like protein 423	TRUE	TRUE																																												TRUE
Gohir.A02G052200	AT4G24580	REN1	Rho GTPase activation protein (RhoGAP) with PH domain		TRUE	TRUE																																											TRUE
Gohir.A02G052300	AT1G24020	MLP423	MLP-like protein 423																																														TRUE
Gohir.A02G052400	AT1G24020	MLP423	MLP-like protein 423																																														TRUE
Gohir.A02G052500	AT2G44860		Ribosomal protein L24e family protein																																														TRUE
Gohir.A02G052600	AT1G24020	MLP423	MLP-like protein 423																																														TRUE
Gohir.A02G052700	AT1G24020	MLP423	MLP-like protein 423																																														TRUE
Gohir.A02G052800	AT3G06760		Drought-responsive family protein		TRUE																																												TRUE
Gohir.A02G052900	AT4G16120	ATSEB1,COBL7,SEB1	COBRA-like protein-7 precursor		TRUE																																												TRUE
Gohir.A02G053000	AT1G24020	MLP423	MLP-like protein 423																																														TRUE
Gohir.A02G053100	AT3G06720	AIMP ALPHA,AT-IMP,ATKAP ALPHA,IMPA-1,IMPA1	importin alpha isoform 1		TRUE																																												TRUE
Gohir.A02G053200	AT3G16910	AAE7,ACN1	acyl-activating enzyme 7																																														TRUE
Gohir.A02G053300	AT3G16910	AAE7,ACN1	acyl-activating enzyme 7	TRUE	TRUE	TRUE																																											TRUE
Gohir.A02G053400	AT3G16910	AAE7,ACN1	acyl-activating enzyme 7																																														TRUE
Gohir.A02G053500	AT4G16150		calmodulin binding;transcription regulators	TRUE	TRUE																																												TRUE
Gohir.A02G053600	AT3G62560		Ras-related small GTP-binding family protein																																														TRUE
Gohir.A02G053700	AT3G06680		Ribosomal L29e protein family																																														TRUE
Gohir.A02G053800	AT3G06670		binding	TRUE	TRUE																																												TRUE
Gohir.A02G053900	AT3G03450	RGL2	RGA-like 2																																														TRUE
Gohir.A02G054000	AT3G06660		PAPA-1-like family protein / zinc finger (HIT type) family protein	TRUE	TRUE																																												TRUE
Gohir.A02G054100	AT3G66658	ALDH22A1	aldehyde dehydrogenase 22A1																																														TRUE
Gohir.A02G054200	AT3G66654		Cyclophilin-like peptidyl-prolyl cis-trans isomerase family protein	TRUE	TRUE	TRUE																																											TRUE
Gohir.A02G054300	AT2G23060		Acyl-CoA N-acyltransferases (NAT) superfamily protein																																														TRUE
Gohir.A02G054400	AT1G22710	ATSUC2,SUC2,SUT1	sucrose-proton symporter 2																																														TRUE
Gohir.A02G054500	AT5G28680	ANX2	Malectin/receptor-like protein kinase family protein																																														TRUE
Gohir.A02G054600				TRUE	TRUE																																												TRUE
Gohir.A02G054700	AT3G15740		RING/U-box superfamily protein																																														TRUE
Gohir.A02G054800	AT3G06620		PAS domain-containing protein tyrosine kinase family protein																																														TRUE
Gohir.A02G054900	AT3G06610		DNA-binding enhancer protein-related																																														TRUE
Gohir.A02G055000	AT3G17090		Protein phosphatase 2C family protein		TRUE																																												TRUE
Gohir.A02G055100																																																	TRUE
Gohir.A02G055200																																																	TRUE
Gohir.A02G055300	AT3G06590		basic helix-loop-helix (bHLH) DNA-binding superfamily protein	TRUE	TRUE																																												TRUE
Gohir.A02G055400	AT5G49520	ATWRKY48,WRKY48	WRKY DNA-binding protein 48	TRUE	TRUE																																												TRUE
Gohir.A02G055500	AT4G16270		Peroxidase superfamily protein																																														TRUE
Gohir.A02G055600	AT3G12460		Polynucleotidyl transferase ribonuclease H-like superfamily protein																																														TRUE
Gohir.A02G055700	AT3G06560	PAPS3	poly(A) polymerase 3	TRUE	TRUE																																												TRUE
Gohir.A02G055800	AT5G65960		GTP binding	TRUE	TRUE	TRUE																																											TRUE
Gohir.A02G055900	AT5G49540		Rab5-interacting family protein																																														TRUE
Gohir.A02G056000	AT5G49600		Protein of unknown function DUF538																																														TRUE
Gohir.A02G056100	AT5G49620	AtMYB78,MYB78	myb domain protein 78																																														TRUE
Gohir.A02G056200	AT5G49930	emb1441	zinc knuckle (CCHC-type) family protein																																														TRUE
Gohir.A02G056300	AT5G30510	ARRPS1,RPS1	ribosomal protein S1																																														TRUE
Gohir.A02G056400	AT5G30490				TRUE																																												TRUE
Gohir.A02G056500	AT1G48030	mtLPD1	mitochondrial lipoamide dehydrogenase 1																																														TRUE
Gohir.A02G056600	AT3G62260		Protein phosphatase 2C family protein																																														TRUE
Gohir.A02G056700	AT3G06440		Galactosyltransferase family protein	TRUE	TRUE																																												TRUE
Gohir.A02G056800	AT1G48090		calcium-dependent lipid-binding family protein	TRUE	TRUE	TRUE																																											TRUE
Gohir.A02G056900	AT3G06480		DEAD box RNA helicase family protein	TRUE	TRUE																																												TRUE
Gohir.A02G057000																																																	TRUE
Gohir.A02G057100	AT4G29510	ATPRMT11,ATPRMT1B,PRMT11,PRMT1B	arginine methyltransferase 11																																														TRUE
Gohir.A02G057200	AT5G04070		NAD(P)-binding Rossmann-fold superfamily protein	TRUE	TRUE																																												TRUE
Gohir.A02G057300	AT3G17365		S-adenosyl-L-methionine-dependent methyltransferases superfamily protein																																														TRUE
Gohir.A02G057400	AT3G17380		TRAF-like family protein		TRUE																																												TRUE
Gohir.A02G057500	AT3G15580	APG8H,ATG8I	Ubiquitin-like superfamily protein		TRUE																																												TRUE
Gohir.A02G057600	AT3G17390	MAT4,MTO3,SAMS3	S-adenosylmethionine synthetase family protein																																														TRUE
Gohir.A02G057700	AT2G47070	SPL1	squamosa promoter binding protein-like 1																																														TRUE
Gohir.A02G057800	AT3G17410	none	Protein kinase superfamily protein																																														TRUE
Gohir.A02G057900	AT5G18500		Protein kinase superfamily protein	TRUE	TRUE	TRUE																																											TRUE
Gohir.A02G058000	AT5G23710		DNA binding;DNA-directed RNA polymerases																																														TRUE
Gohir.A02G058100	AT3G17440	ATNPSN13,NPSN13	novel plant snare 13		TRUE																																												TRUE
Gohir.A02G058200	AT5G30495		Fcf2 pre-rRNA processing protein																																														TRUE
Gohir.A02G058300																																																	TRUE
Gohir.A02G058400	AT1G09520																																																TRUE
Gohir.A02G058500	AT3G17465	RPL3P	ribosomal protein L3 plastid		TRUE																																												TRUE
Gohir.A02G058600	AT2G18340		late embryogenesis abundant domain-containing protein / LEA domain-containing protein		TRUE																																												TRUE
Gohir.A02G058700	AT4G13200			TRUE	TRUE																																												TRUE
Gohir.A02G058800	AT3G06950		Pseudouridine synthase family protein																																														TRUE
Gohir.A02G058900	AT1G48270	GCR1	G-protein-coupled receptor 1																																														TRUE
Gohir.A02G059000	AT5G48960		HAD-superfamily hydrolase subfamily IG 5\-nucleotidase		TRUE																																												TRUE
Gohir.A02G059100	AT1G48280		hydroxyproline-rich glycoprotein family protein	TRUE	TRUE																																												TRUE
Gohir.A02G059200																																																	TRUE
Gohir.A02G059300	AT3G21760	HYR1	UDP-Glycosyltransferase superfamily protein	TRUE	TRUE	TRUE																																											TRUE
Gohir.A02G059400	AT1G11910	APA1,ATAPA1	aspartic proteinase A1	TRUE	TRUE																																												TRUE
Gohir.A02G059500	AT1G11910	APA1,ATAPA1	aspartic proteinase A1																																														TRUE
Gohir.A02G059600	AT1G48320		Thioesterase superfamily protein	TRUE	TRUE																																												TRUE
Gohir.A02G059700					TRUE																																												TRUE
Gohir.A02G059800	AT3G05858																																																TRUE
Gohir.A02G059900	AT1G35510		O-fucosyltransferase family protein	TRUE	TRUE																																												TRUE
Gohir.A02G060000	AT4G34890	ATXDH1,XDH1	xanthine dehydrogenase 1																																														TRUE
Gohir.A02G060100	AT1G35670	ATCDPK2,ATCPK11,CDPK2,CPK11	calcium-dependent protein kinase 2			TRUE																																											TRUE
Gohir.A02G060200	AT4G09580		SNARE associated Golgi protein family	TRUE	TRUE																																												TRUE
Gohir.A02G060300	AT1G75750	GASA1	GAST1 protein homolog 1	TRUE	TRUE																																												TRUE
Gohir.A02G060400	AT4G09620		Mitochondrial transcription termination factor family protein																																														TRUE
Gohir.A02G060500	AT4G09630		Protein of unknown function (DUF616)						TRUE																																								TRUE
Gohir.A02G060600	AT4G02600	ATMLO1,MLO1	Seven transmembrane MLO family protein	TRUE	TRUE				TRUE																																								TRUE
Gohir.A02G060700	AT1G34370	STOP1	C2H2 and C2HC zinc fingers superfamily protein		TRUE	TRUE			TRUE																																								TRUE
Gohir.A02G060800	AT1G34340		alpha/beta-Hydrolases superfamily protein		TRUE				TRUE																																								TRUE
Gohir.A02G060900	AT1G22710	ATSUC2,SUC2,SUT1	sucrose-proton symporter 2						TRUE																																								TRUE
Gohir.A02G061000	AT1G07950	MED22B	Surfeit locus protein 5 subunit 22 of Mediator complex																																														TRUE
Gohir.A02G061100	AT1G07950	MED22B	Surfeit locus protein 5 subunit 22 of Mediator complex						TRUE																																								TRUE
Gohir.A02G061200	AT1G34320		Protein of unknown function (DUF668)						TRUE																																								TRUE
Gohir.A02G061300	AT1G34300		lectin protein kinase family protein	TRUE	TRUE																																												TRUE
Gohir.A02G061400	AT1G34270		Exostosin family protein	TRUE	TRUE																																												TRUE
Gohir.A02G061500	AT3G02430		Protein of unknown function (DUF679)																																														TRUE
Gohir.A02G061600	AT1G34245	EPF2	Putative membrane lipoprotein																																														TRUE
Gohir.A02G061700	AT1G34190	anac017,NAC017	NAC domain containing protein 17																																														TRUE
Gohir.A02G061800	AT1G34150		Pseudouridine synthase family protein	TRUE	TRUE				TRUE																																								TRUE
Gohir.A02G061900	AT1G22730		MA3 domain-containing protein		TRUE				TRUE																																								TRUE
Gohir.A02G062000	AT4G09720	ATRABG3A,RABG3A	RAB GTPase homolog G3A						TRUE																																								TRUE
Gohir.A02G062100	AT5G09360	LAC14	laccase 14						TRUE																																								TRUE
Gohir.A02G062200	AT1G71760								TRUE																																								TRUE
Gohir.A02G062300	AT1G71720		Nucleic acid-binding proteins superfamily		TRUE				TRUE																																								TRUE
Gohir.A02G062400	AT1G71710		DNAse I-like superfamily protein																																														TRUE
Gohir.A02G062500	AT2G41350								TRUE																																								TRUE
Gohir.A02G062600	AT1G22770	FB,GI	gigantea protein (GI)	TRUE	TRUE				TRUE																																								TRUE
Gohir.A02G062700	AT1G34030		Ribosomal protein S13/S18 family			TRUE			TRUE																																								TRUE
Gohir.A02G062800	AT4G09830		Uncharacterised conserved protein UCP009193		TRUE				TRUE																																								TRUE
Gohir.A02G062900	AT4G24100		Protein kinase superfamily protein		TRUE				TRUE																																								TRUE
Gohir.A02G063000	AT1G71695		Peroxidase superfamily protein																																														TRUE
Gohir.A02G063100	AT4G09890		Protein of unknown function (DUF3511)						TRUE																																								TRUE
Gohir.A02G063200	AT4G24630		DHHC-type zinc finger family protein						TRUE																																								TRUE
Gohir.A02G063300	AT5G61890		Integrase-type DNA-binding superfamily protein						TRUE																																								TRUE
Gohir.A02G063400									TRUE																																								TRUE
Gohir.A02G063500	AT1G43190	PTB3	polypyrimidine tract-binding protein 3						TRUE																																								TRUE
Gohir.A02G063600	AT1G43170	ARP1,emb2207,RP1,RPL3A	ribosomal protein 1			TRUE																																											TRUE
Gohir.A02G063700	AT5G44080		Basic-leucine zipper (bZIP) transcription factor family protein		TRUE																																												TRUE
Gohir.A02G063800	AT1G21090		Cupredoxin superfamily protein	TRUE	TRUE																																												TRUE
Gohir.A02G063900	AT1G18740		Protein of unknown function (DUF793)																																														TRUE
Gohir.A02G064000																																																	TRUE
Gohir.A02G064100					TRUE																																												TRUE
Gohir.A02G064200	AT1G21200		sequence-specific DNA binding transcription factors		TRUE																																												TRUE
Gohir.A02G064300	AT1G76850	SEC5A	exocyst complex component sec5		TRUE																																												TRUE
Gohir.A02G064400	AT2G31290		Ubiquitin carboxyl-terminal hydrolase family protein	TRUE	TRUE																																												TRUE
Gohir.A02G064500	AT1G43700	SUE3,VIP1	VIRE2-interacting protein 1		TRUE																																												TRUE
Gohir.A02G064600	AT4G02580		NADH-ubiquinone oxidoreductase 24 kDa subunit putative																																														TRUE
Gohir.A02G064700	AT5G45340	CYP707A3	cytochrome P450 family 707 subfamily A polypeptide 3																																														TRUE
Gohir.A02G064800																																																	TRUE
Gohir.A02G064900	AT4G38470		ACT-like protein tyrosine kinase family protein		TRUE																																												TRUE
Gohir.A02G065000				TRUE	TRUE																																												TRUE
Gohir.A02G065100				TRUE	TRUE																																												TRUE
Gohir.A02G065200					TRUE																																												TRUE
Gohir.A02G065300				TRUE	TRUE																																												TRUE
Gohir.A02G065400	AT1G43670		Inositol monophosphatase family protein																																														TRUE
Gohir.A02G065500	AT5G42140		Regulator of chromosome condensation (RCC1) family with FYVE zinc finger domain	TRUE	TRUE																																												TRUE
Gohir.A02G065600	AT3G18710	ATPUB29,PUB29	plant U-box 29																																														TRUE
Gohir.A02G065700	AT5G42120		Concanavalin A-like lectin protein kinase family protein	TRUE	TRUE																																												TRUE
Gohir.A02G065800	AT1G10830	Z-ISO,Z-ISO1.1,Z-ISO1.2	15-cis-zeta-carotene isomerase	TRUE	TRUE																																												TRUE
Gohir.A02G065900																																																	TRUE
Gohir.A02G066000	AT3G52440		Dof-type zinc finger DNA-binding family protein																																														TRUE
Gohir.A02G066100	AT5G48940		Leucine-rich repeat transmembrane protein kinase family protein																																														TRUE
Gohir.A02G066200	AT1G21370																																																TRUE
Gohir.A02G066300	AT1G78780		pathogenesis-related family protein																																														TRUE
Gohir.A02G066400	AT3G09040		Pentatricopeptide repeat (PPR) superfamily protein																																														TRUE
Gohir.A02G066500	AT1G43790	TED6	tracheary element differentiation-related 6																																														TRUE
Gohir.A02G066600	AT1G77120	ADH,ADH1,ATADH,ATADH1	alcohol dehydrogenase 1																																														TRUE
Gohir.A02G066700	AT2G39940	COI1	RNI-like superfamily protein																																														TRUE
Gohir.A02G066800	AT1G77120	ADH,ADH1,ATADH,ATADH1	alcohol dehydrogenase 1		TRUE	TRUE																																											TRUE
Gohir.A02G066900	AT1G77110	PIN6	Auxin efflux carrier family protein																																														TRUE
Gohir.A02G067000	AT4G08350	GTA02,GTA2	global transcription factor group A2																																														TRUE
Gohir.A02G067100	AT1G21480		Exostosin family protein		TRUE																																												TRUE
Gohir.A02G067200	AT1G77090		Mog1/PsbP/DUF1795-like photosystem II reaction center PsbP family protein																																														TRUE
Gohir.A02G067300					TRUE																																												TRUE
Gohir.A02G067400	AT1G21460		Nodulin MtN3 family protein																																														TRUE
Gohir.A02G067500																																																	TRUE
Gohir.A02G067600																																																	TRUE
Gohir.A02G067700																																																	TRUE
Gohir.A02G067800	AT1G43850	SEU	SEUSS transcriptional co-regulator																																														TRUE
Gohir.A02G067900	AT4G03520	ATHM2	Thioredoxin superfamily protein																																														TRUE
Gohir.A02G068000	AT1G53570	MAP3KA,MAPKKK3	mitogen-activated protein kinase kinase kinase 3																																														TRUE
Gohir.A02G068100	AT1G43860		sequence-specific DNA binding transcription factors		TRUE																																												TRUE
Gohir.A02G068200	AT5G25800		Polynucleotidyl transferase ribonuclease H-like superfamily protein																																														TRUE
Gohir.A02G068300	AT1G21450	SCL1	SCARECROW-like 1		TRUE																																												TRUE
Gohir.A02G068400	AT1G43890	ATRAB-C1,ATRAB18,ATRABC1,RAB18,RAB18-1,RABC1	RAB GTPASE HOMOLOG B18																																														TRUE
Gohir.A02G068500	AT1G43900		Protein phosphatase 2C family protein																																														TRUE
Gohir.A02G068600	AT1G77030		hydrolases acting on acid anhydrides in phosphorus-containing anhydrides;ATP-dependent helicases;nucleic acid binding;ATP binding;RNA binding;helicases	TRUE	TRUE																																												TRUE
Gohir.A02G068700	AT1G77000	ATSKP2;2,SKP2B	RNI-like superfamily protein																																														TRUE
Gohir.A02G068800	AT1G76990	ACR3	ACT domain repeat 3	TRUE	TRUE																																												TRUE
Gohir.A02G068900	AT1G55200		Protein kinase protein with adenine nucleotide alpha hydrolases-like domain	TRUE	TRUE																																												TRUE
Gohir.A02G069000	AT1G21400		Thiamin diphosphate-binding fold (THDP-binding) superfamily protein																																														TRUE
Gohir.A02G069100	AT1G43980		Tetratricopeptide repeat (TPR)-like superfamily protein	TRUE	TRUE																																												TRUE
Gohir.A02G069200	AT1G77010		Pentatricopeptide repeat (PPR) superfamily protein	TRUE	TRUE																																												TRUE
Gohir.A02G069300	AT1G76980																																																TRUE
Gohir.A02G069400	AT1G44000			TRUE	TRUE																																												TRUE
Gohir.A02G069500	AT1G21270	WAK2	wall-associated kinase 2																																														TRUE
Gohir.A02G069600									TRUE																																								TRUE
Gohir.A02G069700	AT1G29470		S-adenosyl-L-methionine-dependent methyltransferases superfamily protein	TRUE	TRUE	TRUE			TRUE																																								TRUE
Gohir.A02G069800									TRUE																																								TRUE
Gohir.A02G069900	AT1G21270	WAK2	wall-associated kinase 2	TRUE	TRUE				TRUE																																								TRUE
Gohir.A02G070000	AT1G78630	emb1473	Ribosomal protein L13 family protein	TRUE	TRUE				TRUE																																								TRUE
Gohir.A02G070100	AT1G21270	WAK2	wall-associated kinase 2						TRUE																																								TRUE
Gohir.A02G070200	AT1G21240	WAK3	wall associated kinase 3	TRUE	TRUE				TRUE																																								TRUE
Gohir.A02G070300	AT4G08455		BTB/POZ domain-containing protein	TRUE	TRUE				TRUE																																								TRUE
Gohir.A02G070400	AT1G77260		S-adenosyl-L-methionine-dependent methyltransferases superfamily protein	TRUE	TRUE				TRUE																																								TRUE
Gohir.A02G070500	AT1G21550		Calcium-binding EF-hand family protein						TRUE																																								TRUE
Gohir.A02G070600	AT1G77270								TRUE																																								TRUE
Gohir.A02G070700	AT1G77300	ASHH2,CCR1,EFS,SDG8	histone methyltransferases(H3-K4 specific);histone methyltransferases(H3-K36 specific)	TRUE	TRUE				TRUE																																								TRUE
Gohir.A02G070800	AT5G20240	PI	K-box region and MADS-box transcription factor family protein	TRUE	TRUE				TRUE																																								TRUE
Gohir.A02G070900									TRUE																																								TRUE
Gohir.A02G071000	AT1G21600	PTAC6	plastid transcriptionally active 6		TRUE				TRUE																																								TRUE
Gohir.A02G071100	AT2G47760	ALG3,AtALG3	asparagine-linked glycosylation 3		TRUE																																												TRUE
Gohir.A02G071200	AT1G21610		wound-responsive family protein	TRUE	TRUE				TRUE																																								TRUE
Gohir.A02G071300	AT1G77330		2-oxoglutarate (2OG) and Fe(II)-dependent oxygenase superfamily protein						TRUE																																								TRUE
Gohir.A02G071400	AT1G77330		2-oxoglutarate (2OG) and Fe(II)-dependent oxygenase superfamily protein						TRUE																																								TRUE
Gohir.A02G071500									TRUE																																								TRUE
Gohir.A02G071600	AT1G21650		Preprotein translocase SecA family protein						TRUE																																								TRUE
Gohir.A02G071700	AT1G11050		Protein kinase superfamily protein	TRUE	TRUE				TRUE																																								TRUE
Gohir.A02G071800	AT1G21680		DPP6 N-terminal domain-like protein						TRUE																																								TRUE
Gohir.A02G071900	AT1G21700	ATSWI3C,CHB4,SWI3C	SWITCH/sucrose nonfermenting 3C	TRUE	TRUE	TRUE			TRUE																																								TRUE
Gohir.A02G072000																																																	TRUE
Gohir.A02G072100	AT1G53310	ATPEPC1,ATPPC1,PEPC1,PPC1	phosphoenolpyruvate carboxylase 1	TRUE	TRUE																																												TRUE
Gohir.A02G072200	AT1G21720	PBC1	proteasome beta subunit C1		TRUE																																												TRUE
Gohir.A02G072300	AT4G35890		winged-helix DNA-binding transcription factor family protein																																														TRUE
Gohir.A02G072400	AT1G01720	ANAC002,ATAF1	NAC (No Apical Meristem) domain transcriptional regulator superfamily protein	TRUE	TRUE																																												TRUE
Gohir.A02G072500	AT1G44130		Eukaryotic aspartyl protease family protein	TRUE	TRUE																																												TRUE
Gohir.A02G072600	AT1G44130		Eukaryotic aspartyl protease family protein	TRUE	TRUE																																												TRUE
Gohir.A02G072700	AT1G44170	ALDH3H1,ALDH4	aldehyde dehydrogenase 3H1		TRUE																																												TRUE
Gohir.A02G072800	AT1G21780		BTB/POZ domain-containing protein																																														TRUE
Gohir.A02G072900	AT1G44446	ATCAO,CAO,CH1	Pheophorbide a oxygenase family protein with Rieske [2Fe-2S] domain																																														TRUE
Gohir.A02G073000	AT3G26430		GDSL-like Lipase/Acylhydrolase superfamily protein																																														TRUE
Gohir.A02G073100	AT1G21830																																																TRUE
Gohir.A02G073200	AT1G77610		EamA-like transporter family protein	TRUE	TRUE																																												TRUE
Gohir.A02G073300	AT1G44760		Adenine nucleotide alpha hydrolases-like superfamily protein																																														TRUE
Gohir.A02G073400					TRUE	TRUE																																											TRUE
Gohir.A02G073500	AT4G32880	ATHB-8,ATHB8,HB-8	homeobox gene 8																																														TRUE
Gohir.A02G073600	AT4G08300		nodulin MtN21 /EamA-like transporter family protein		TRUE																																												TRUE
Gohir.A02G073700	AT1G44835		YbaK/aminoacyl-tRNA synthetase-associated domain																																														TRUE
Gohir.A02G073800	AT1G60360		RING/U-box superfamily protein																																														TRUE
Gohir.A02G073900	AT1G77670		Pyridoxal phosphate (PLP)-dependent transferases superfamily protein			TRUE																																											TRUE
Gohir.A02G074000	AT4G08230		glycine-rich protein		TRUE																																												TRUE
Gohir.A02G074100	AT1G77700		Pathogenesis-related thaumatin superfamily protein		TRUE																																												TRUE
Gohir.A02G074200	AT1G77710				TRUE																																												TRUE
Gohir.A02G074300	AT2G17900	SDG37	SET domain group 37																																														TRUE
Gohir.A02G074400	AT4G08180	ORP1C	OSBP(oxysterol binding protein)-related protein 1C																																														TRUE
Gohir.A02G074500																																																	TRUE
Gohir.A02G074600	AT5G14320		Ribosomal protein S13/S18 family																																														TRUE
Gohir.A02G074700	AT1G37130	ATNR2,B29,CHL3,NIA2,NIA2-1,NR,NR2	nitrate reductase 2	TRUE	TRUE																																												TRUE
Gohir.A02G074800	AT4G08500	ARAKIN,ATMEKK1,MAPKKK8,MEKK1	MAPK/ERK kinase kinase 1																																														TRUE
Gohir.A02G074900	AT1G36990			TRUE	TRUE																																												TRUE
Gohir.A02G075000	AT1G36980				TRUE																																												TRUE
Gohir.A02G075100	AT1G36370	SHM7	serine hydroxymethyltransferase 7																																														TRUE
Gohir.A02G075200	AT1G22030				TRUE																																												TRUE
Gohir.A02G075300	AT1G77920		bZIP transcription factor family protein		TRUE																																												TRUE
Gohir.A02G075400	AT4G08540		DNA-directed RNA polymerase II protein		TRUE																																												TRUE
Gohir.A02G075500	AT1G22060					TRUE																																											TRUE
Gohir.A02G075600	AT1G22130	AGL104	AGAMOUS-like 104	TRUE	TRUE																																												TRUE
Gohir.A02G075700	AT4G08685	SAH7	Pollen Ole e 1 allergen and extensin family protein																																														TRUE
Gohir.A02G075800	AT1G78060		Glycosyl hydrolase family protein	TRUE	TRUE																																												TRUE
Gohir.A02G075900	AT1G78080	RAP2.4	related to AP2 4																																														TRUE
Gohir.A02G076000	AT4G16210	E-COAH-2,ECHIA	enoyl-CoA hydratase/isomerase A						TRUE																																								TRUE
Gohir.A02G076100	AT1G78170																																																TRUE
Gohir.A02G076200																																																	TRUE
Gohir.A02G076300	AT1G34630								TRUE																																								TRUE
Gohir.A02G076400	AT1G34780	APRL4,ATAPRL4	APR-like 4						TRUE																																								TRUE
Gohir.A02G076500	AT4G08950	EXO	Phosphate-responsive 1 family protein																																														TRUE
Gohir.A02G076600	AT4G08950	EXO	Phosphate-responsive 1 family protein						TRUE																																								TRUE
Gohir.A02G076700	AT1G78290	SNRK2-8,SNRK2.8,SRK2C	Protein kinase superfamily protein			TRUE			TRUE																																								TRUE
Gohir.A02G076800	AT1G35210			TRUE	TRUE				TRUE																																								TRUE
Gohir.A02G076900	AT2G14095								TRUE																																								TRUE
Gohir.A02G077000	AT1G72210		basic helix-loop-helix (bHLH) DNA-binding superfamily protein		TRUE				TRUE																																								TRUE
Gohir.A02G077100	AT1G72200		RING/U-box superfamily protein		TRUE																																												TRUE
Gohir.A02G077200	AT1G28200	FIP1	FH interacting protein 1	TRUE	TRUE	TRUE			TRUE																																								TRUE
[truncated: 26,533 more rows]
[truncated: 5 more columns]
